# Supplementary material for: In Vitro and In Silico Evaluation of New 1,3,4-Oxadiazole Derivatives of Pyrrolo[3,4-d]pyridazinone as Promising Cyclooxygenase Inhibitors
Source: MDPI journal article supplement (doi:10.3390/ijms22179130), 2021-08-24
Supplement: s1 [file s1]

# SUPPLEMENTARY DATA

## *In vitro* and *in silico* evaluation of new oxadiazole derivatives of pyrrolo[3,4-d]pyridazinone as promising cyclooxygenase inhibitors

Krzysztof Peregrym<sup>1</sup>, Łukasz Szczukowski<sup>1</sup>, Benita Wiatrak<sup>2</sup>, Katarzyna Potyrak<sup>2</sup>, Żaneta Czyżnikowska<sup>3</sup> and Piotr Świątek<sup>1</sup>

<sup>1</sup> Department of Medicinal Chemistry, Faculty of Pharmacy, Wrocław Medical University, Borowska 211, 50-556 Wrocław, Poland; krzysztof.peregrym@student.umed.wroc.pl (K.P.), lukasz.szczukowski@umed.wroc.pl (Ł.S.), piotr.swiatek@umed.wroc.pl (P.Ś.)

<sup>2</sup> Department of Pharmacology, Faculty of Medicine, Wrocław Medical University, Mikulicza-Radeckiego 2, 50-345 Wrocław, Poland; benita.wiatrak@umed.wroc.pl (B.W.), katarzyna.potyrak@student.umed.wroc.pl (K.P.)

<sup>3</sup> Department of Inorganic Chemistry, Wrocław Medical University, Borowska 211, 50-556 Wrocław, Poland; zaneta.czyznikowska@umed.wroc.pl (Ż.C.)

\* Correspondence: piotr.swiatek@umed.wroc.pl ; Tel.: +48 71 784 03 91

## Table of contents

|                                                                                                       |    |
|-------------------------------------------------------------------------------------------------------|----|
| Table S1. Structures of new compounds.....                                                            | 2  |
| Table S2. NMR spectra of new compounds .....                                                          | 5  |
| Table S3. IR spectra of new compounds .....                                                           | 17 |
| Table S4. Mass spectra of new compounds .....                                                         | 23 |
| Table S5. The 2D intermolecular interactions of investigated compounds in the active site of COX..... | 29 |
| Table S6. Binding mode of investigated compounds to COX-1.....                                        | 41 |
| Table S7. Binding mode of investigated compounds to COX-2.....                                        | 43 |

**Table S1.** Structures of new compounds

|                                                                                     |
|-------------------------------------------------------------------------------------|
| 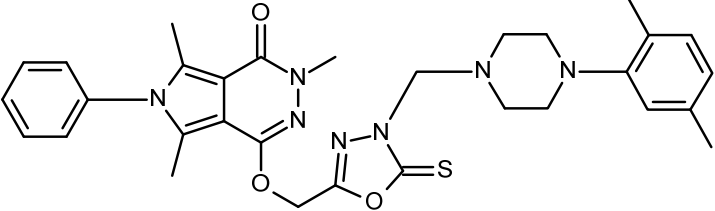   |
| 2a                                                                                  |
|    |
| 2b                                                                                  |
|  |
| 3a                                                                                  |
|  |
| 3b                                                                                  |
|  |
| 4a                                                                                  |

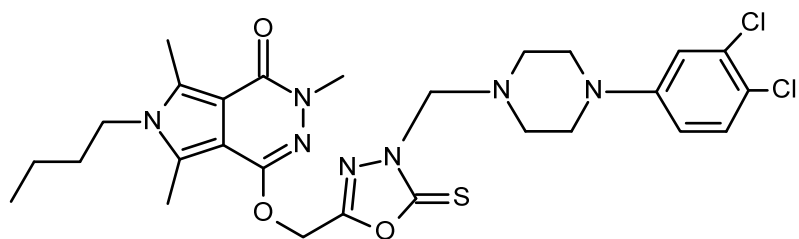

4b

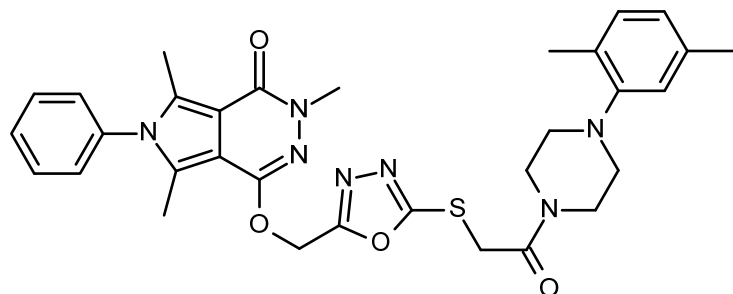

5a

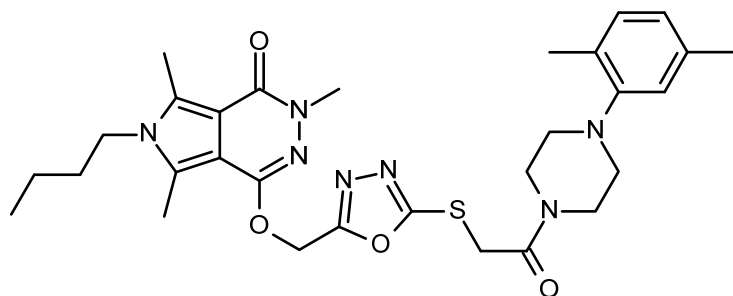

5b

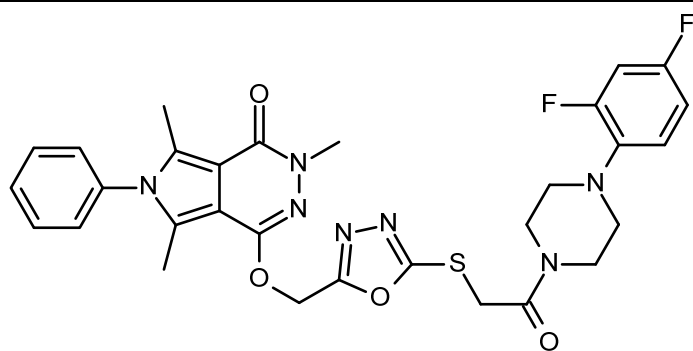

6a

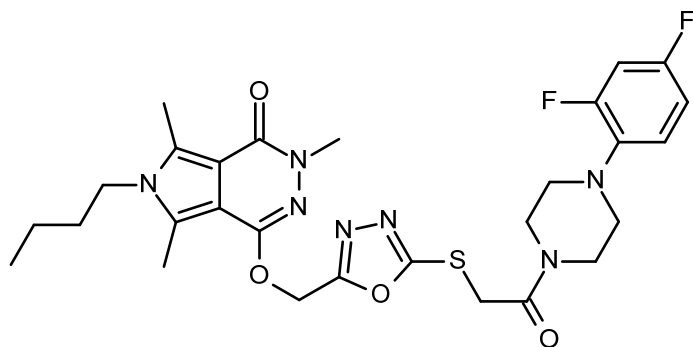

6b

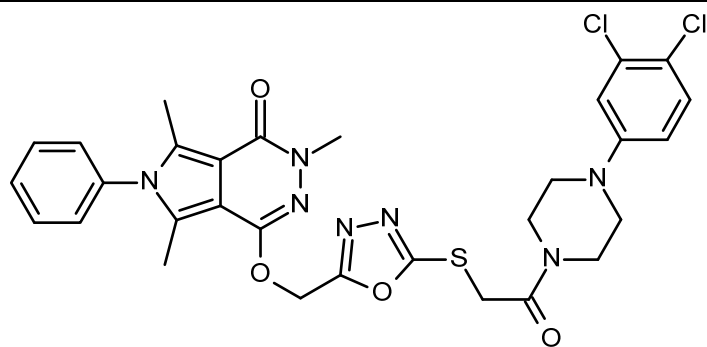

7a

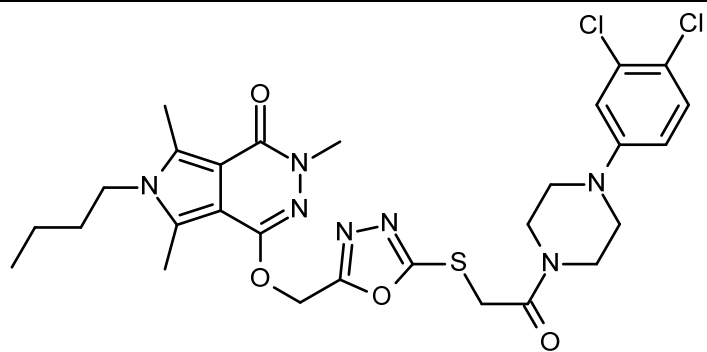

7b



**Table S2.** NMR spectra of new compounds

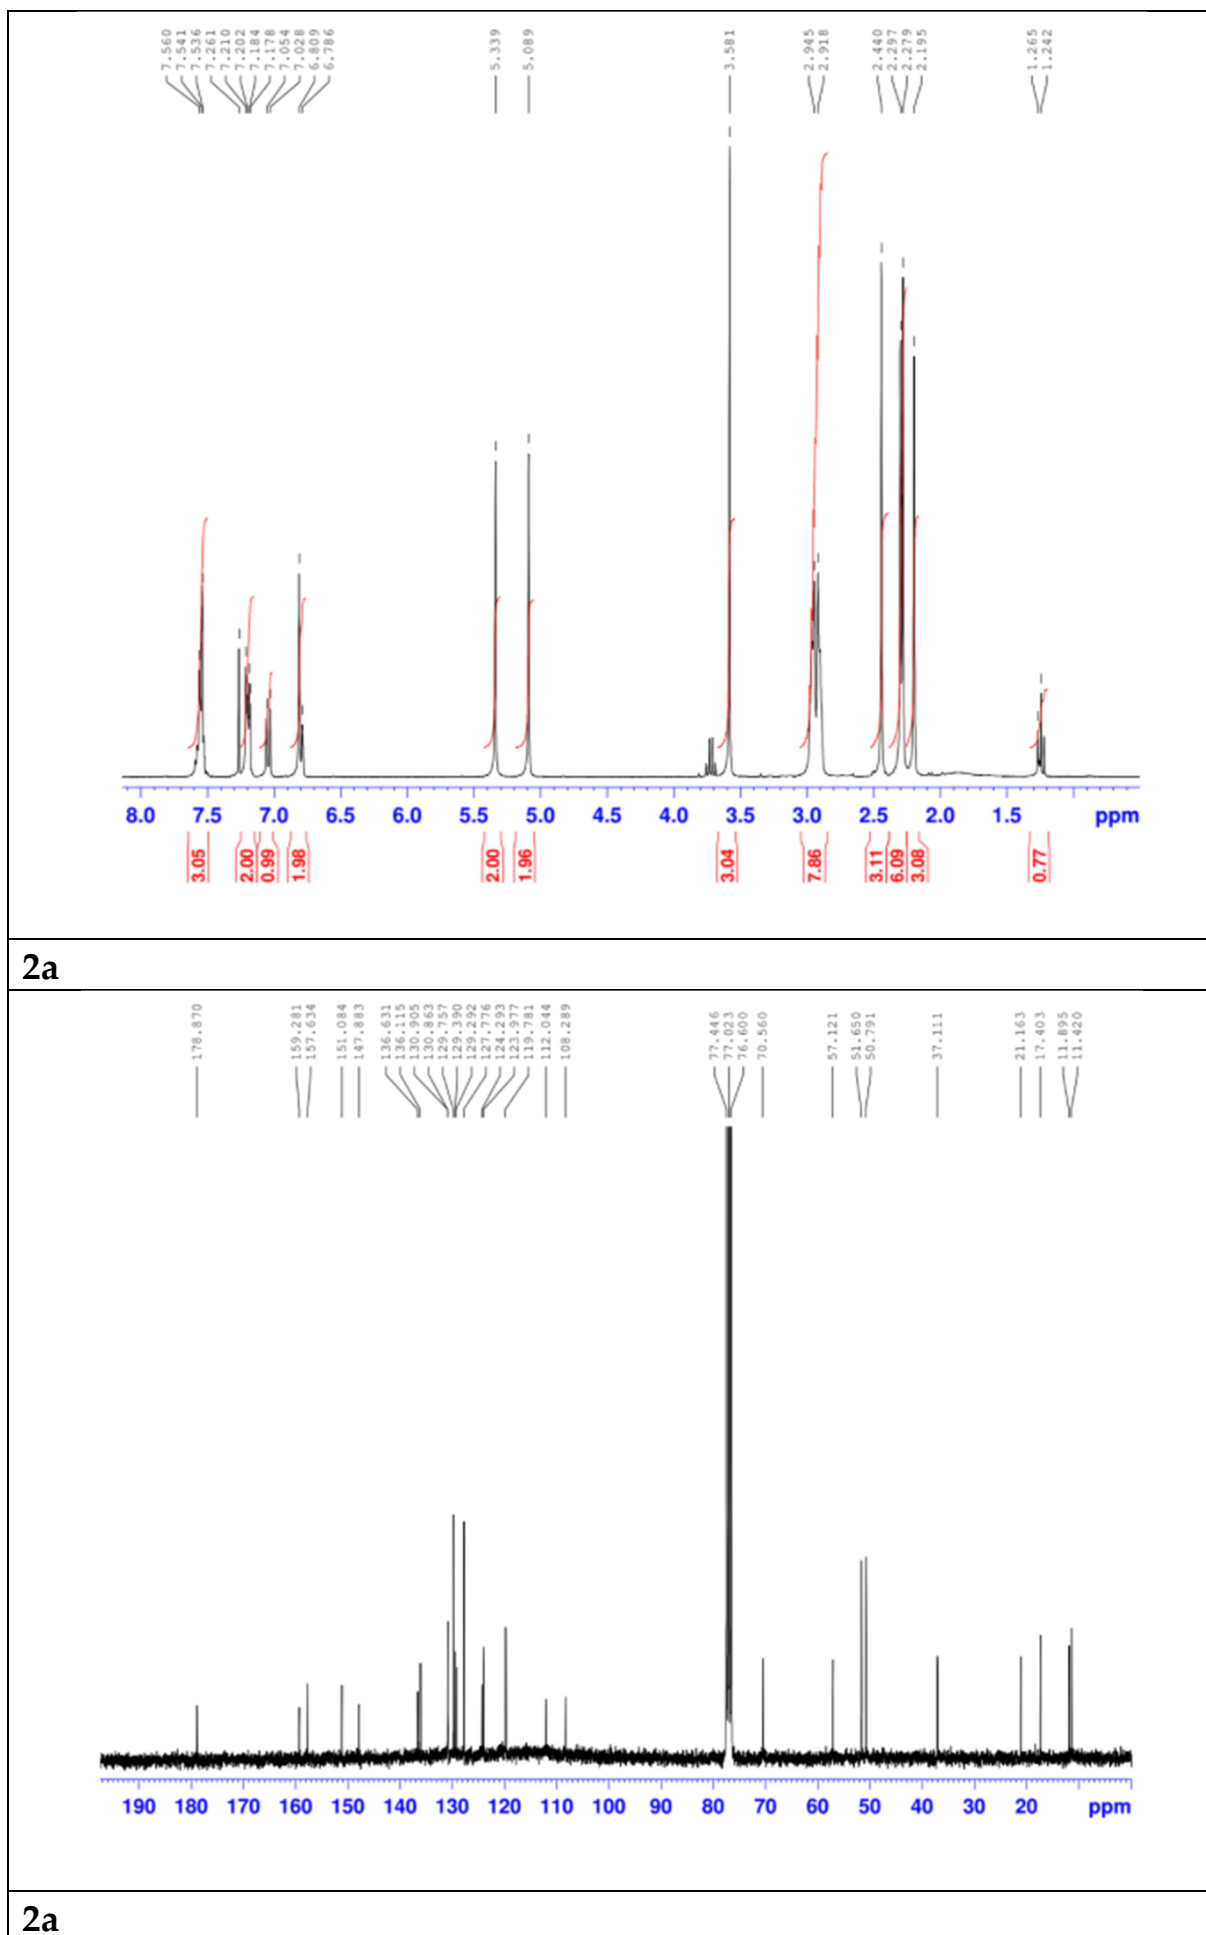

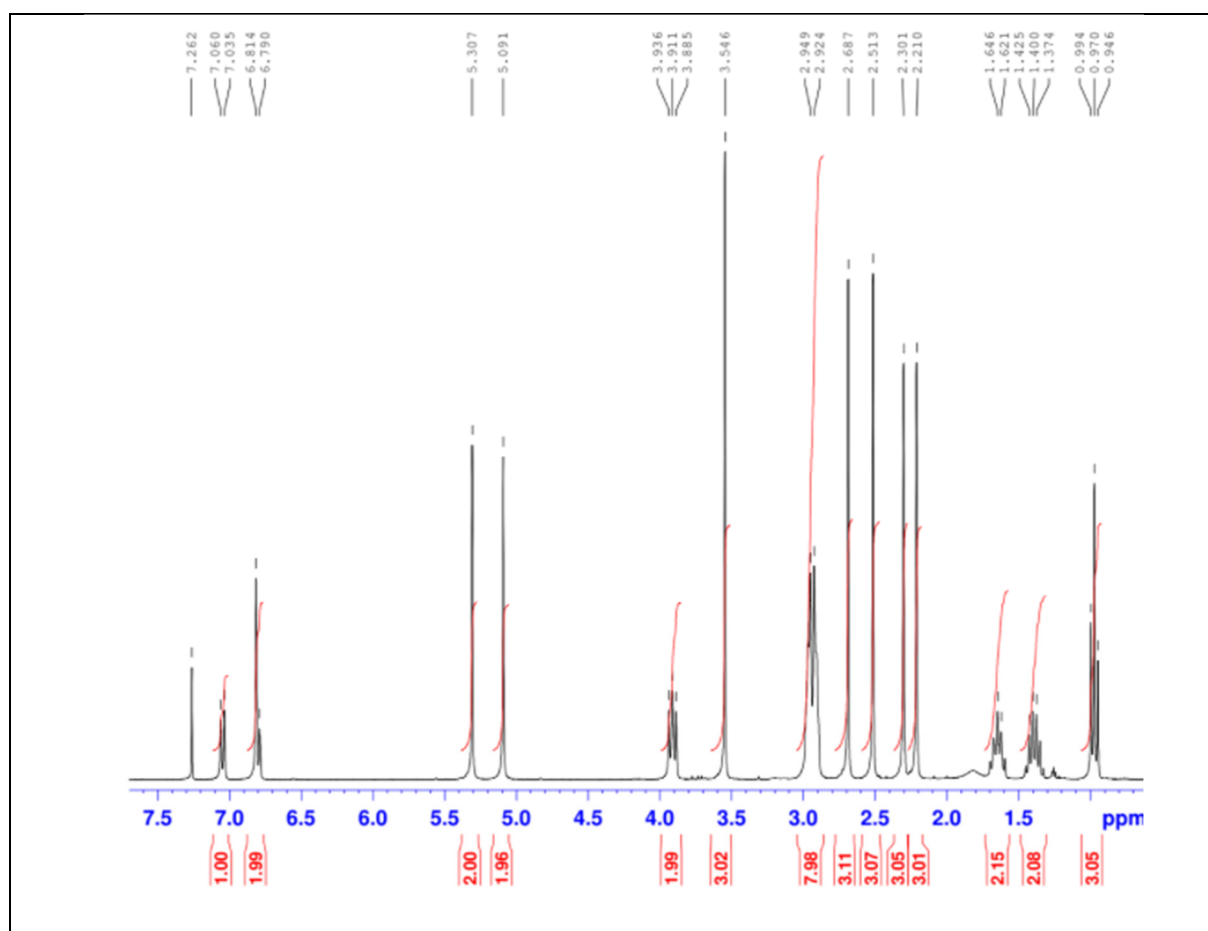

2b

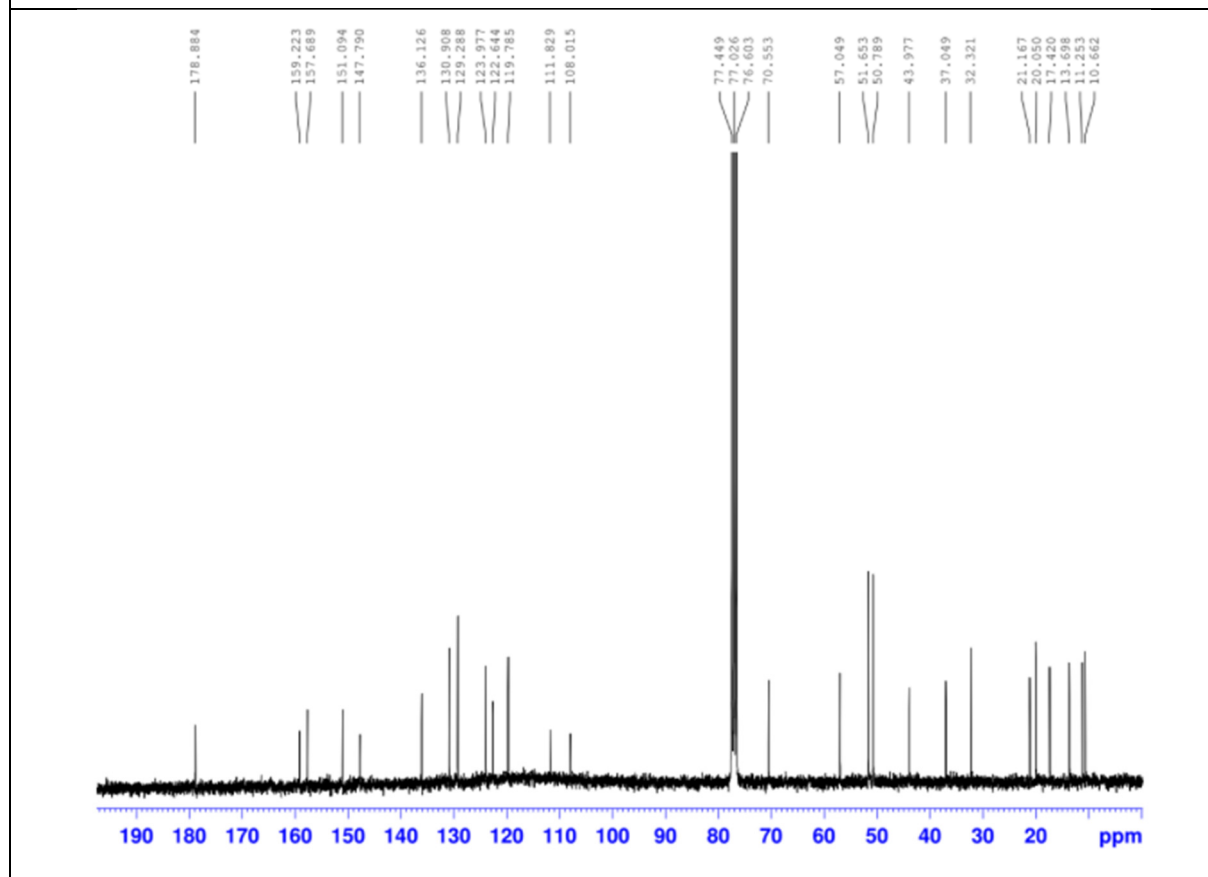

2b

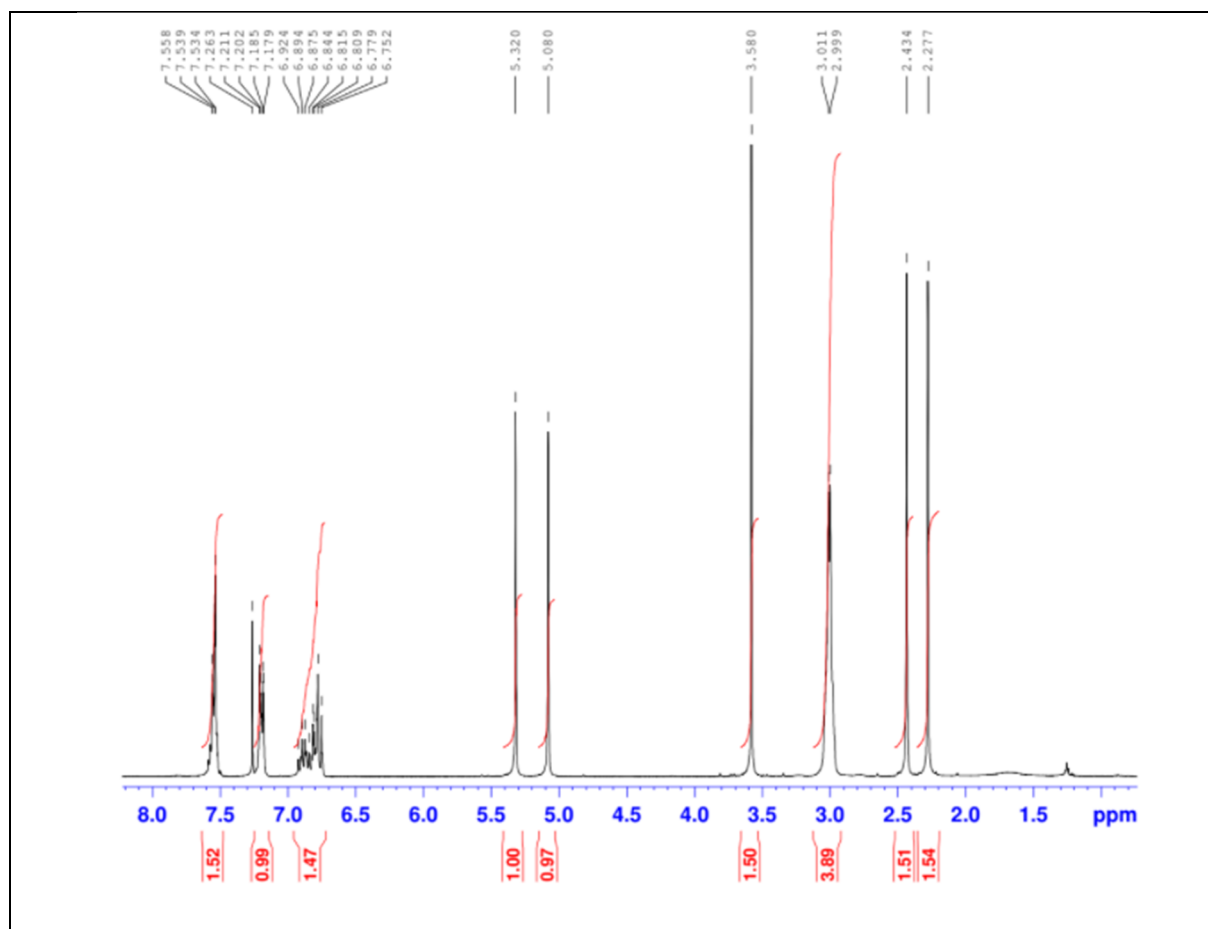

3a

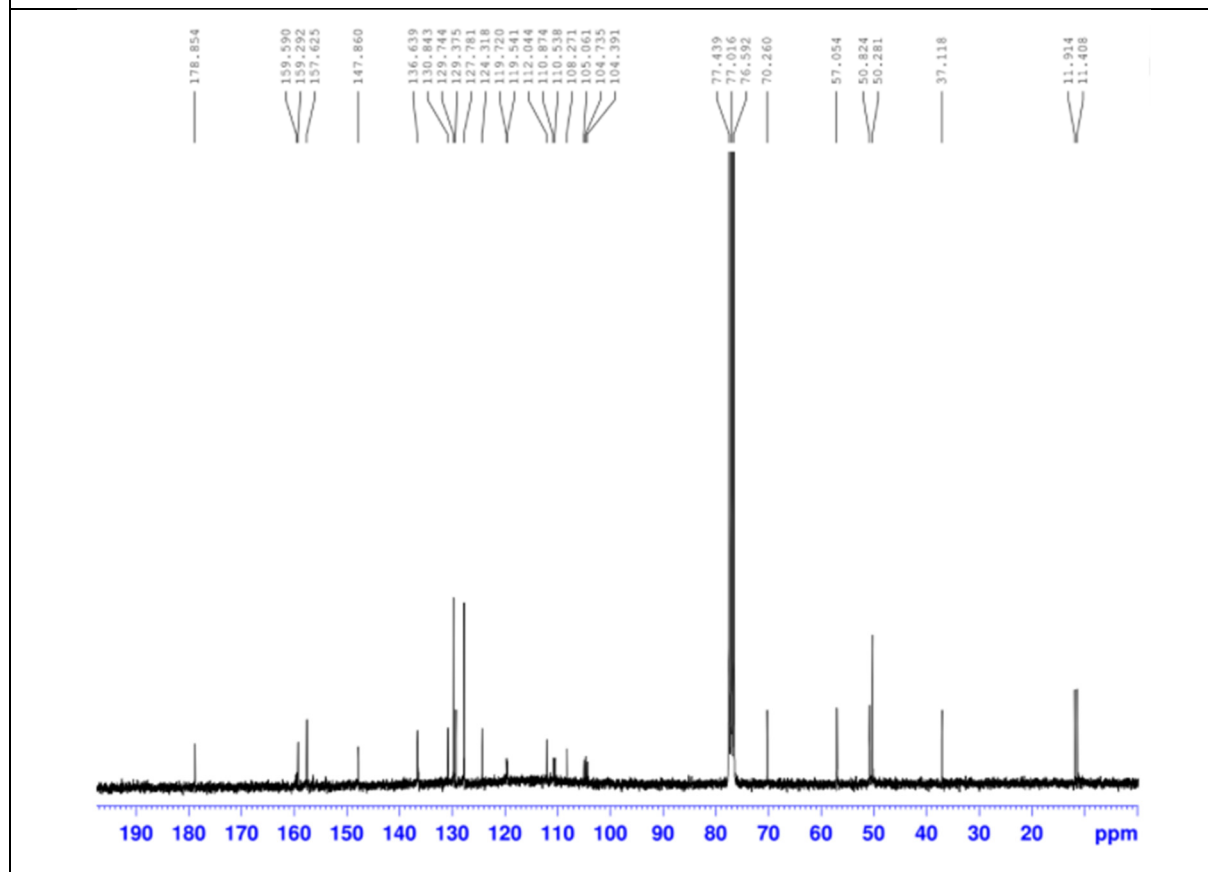

3a

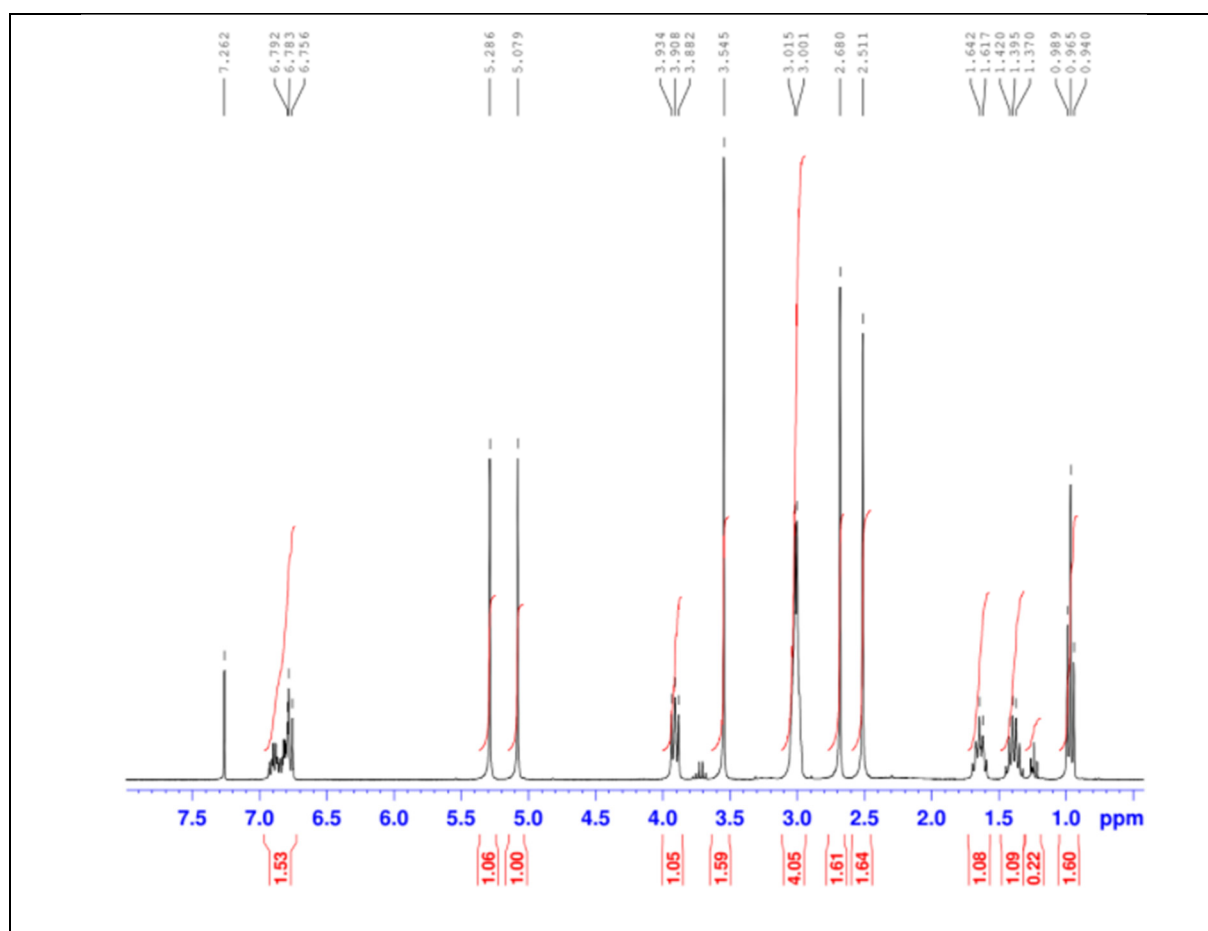

3b

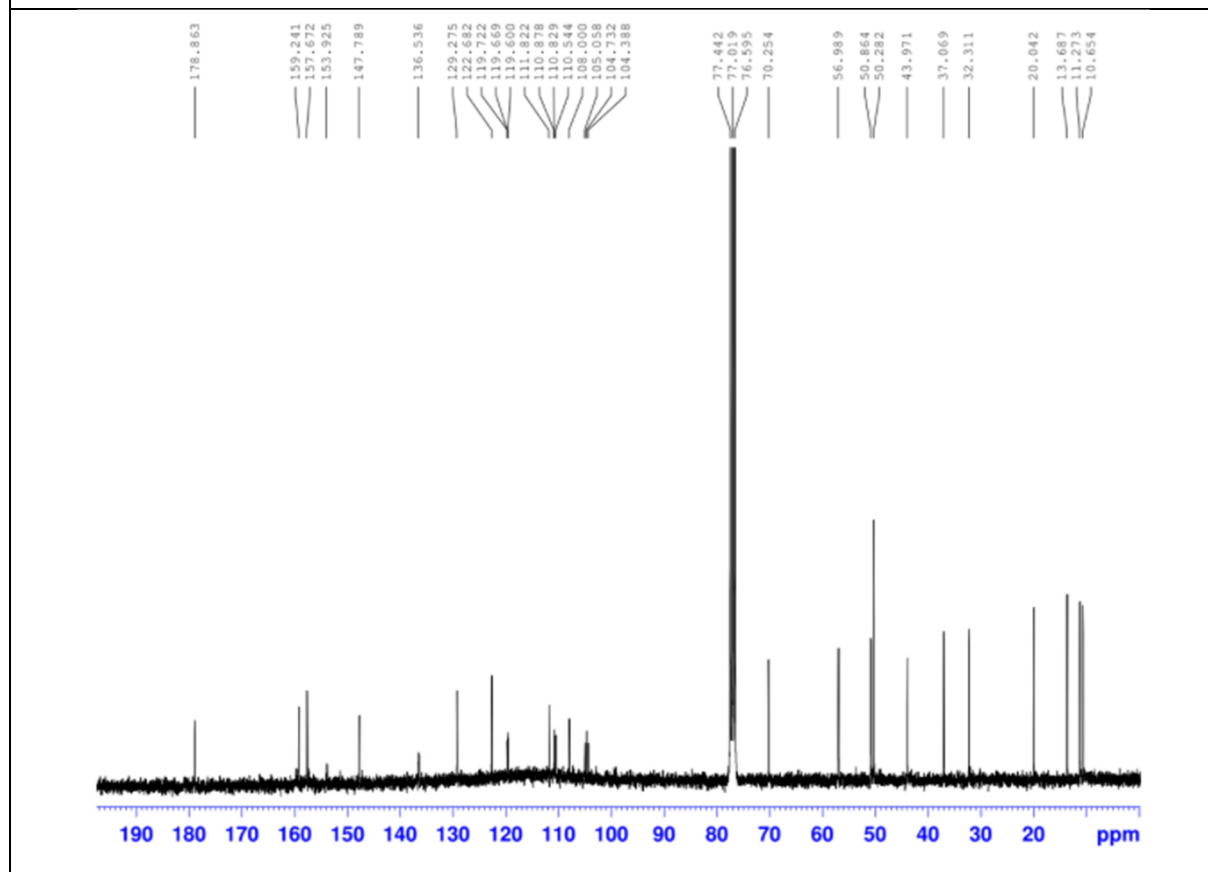

3b

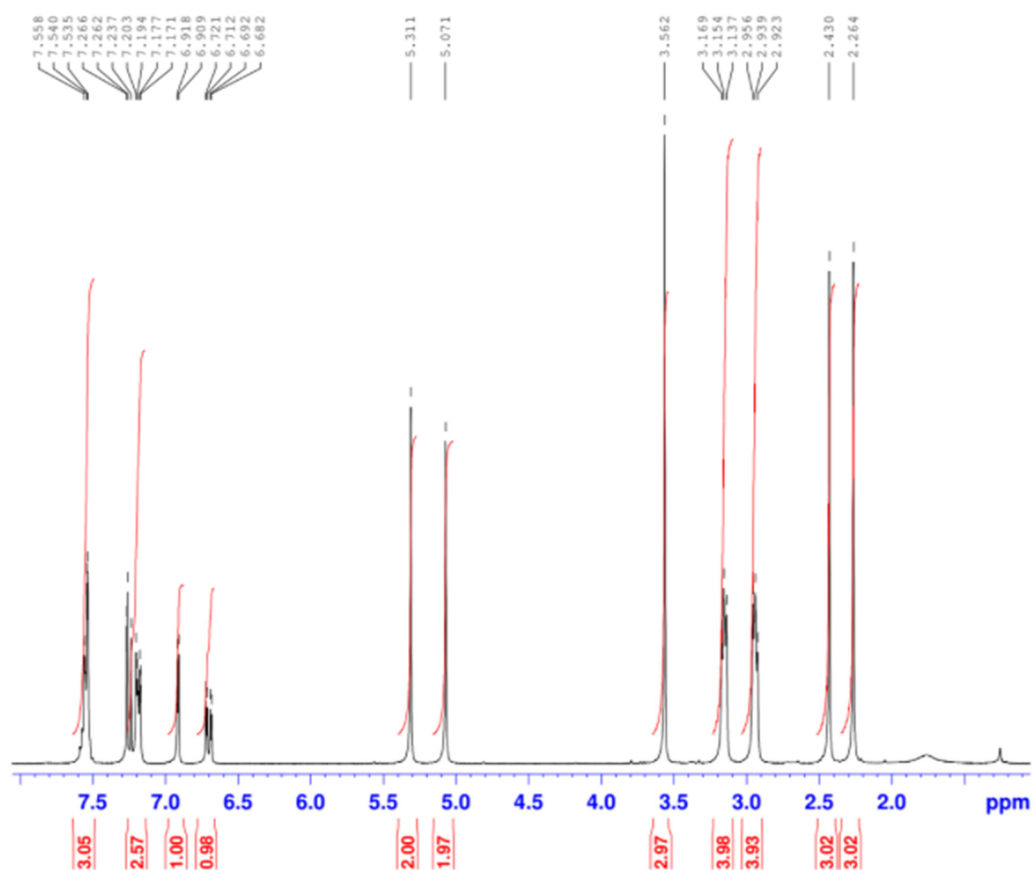

4a

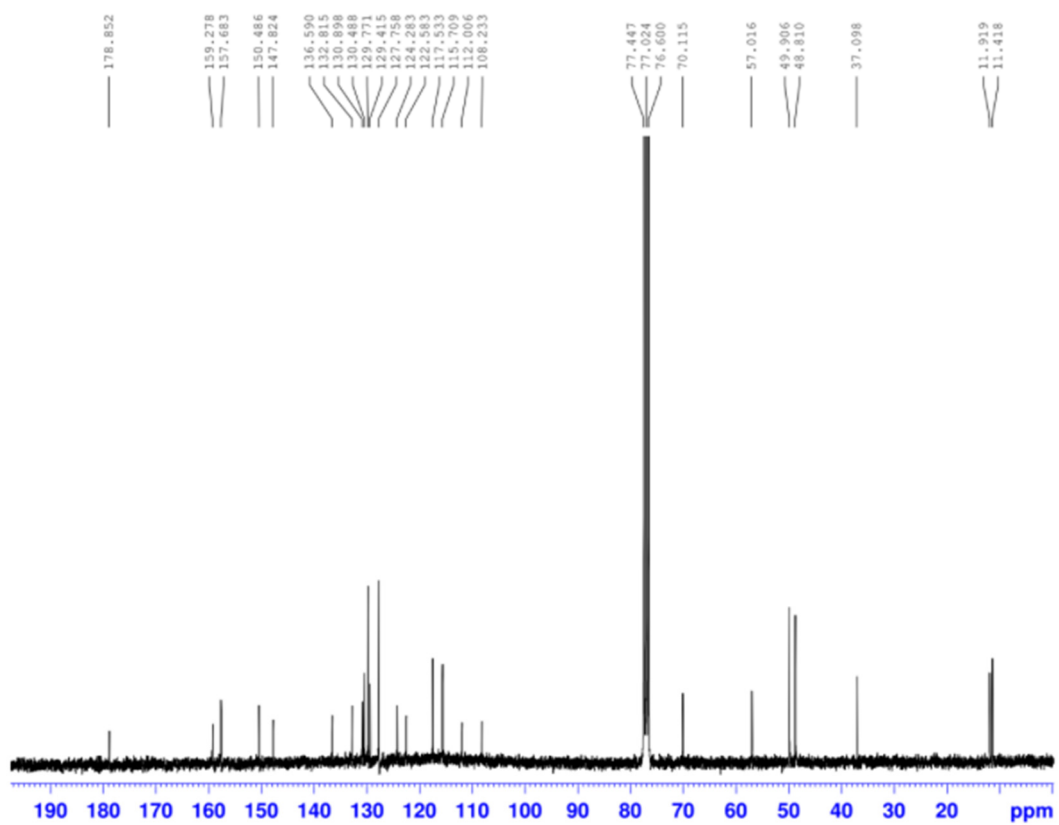

4a

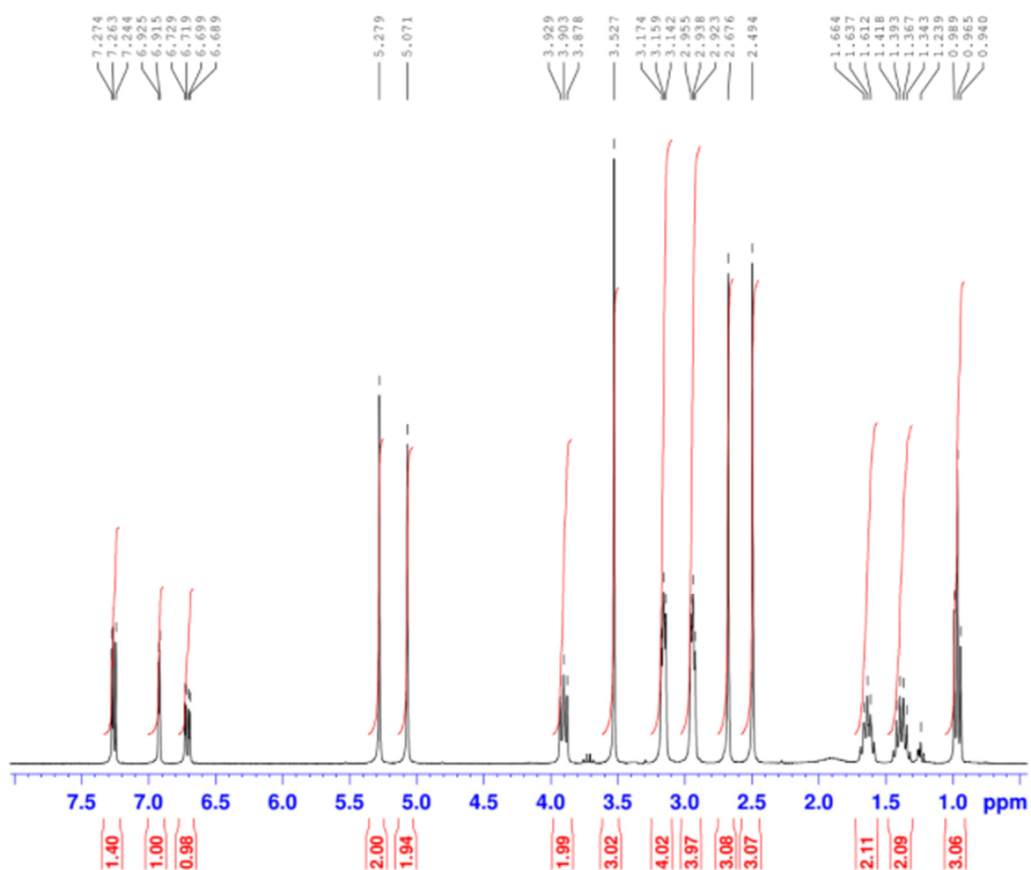

4b

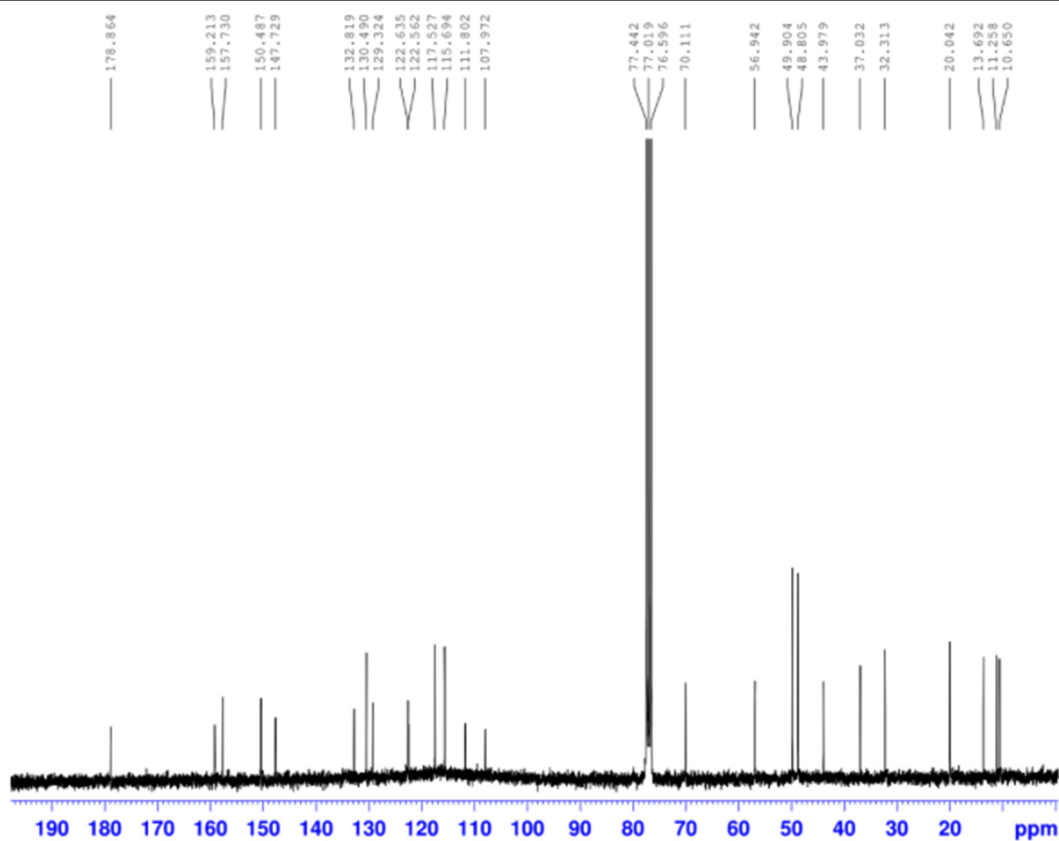

4b

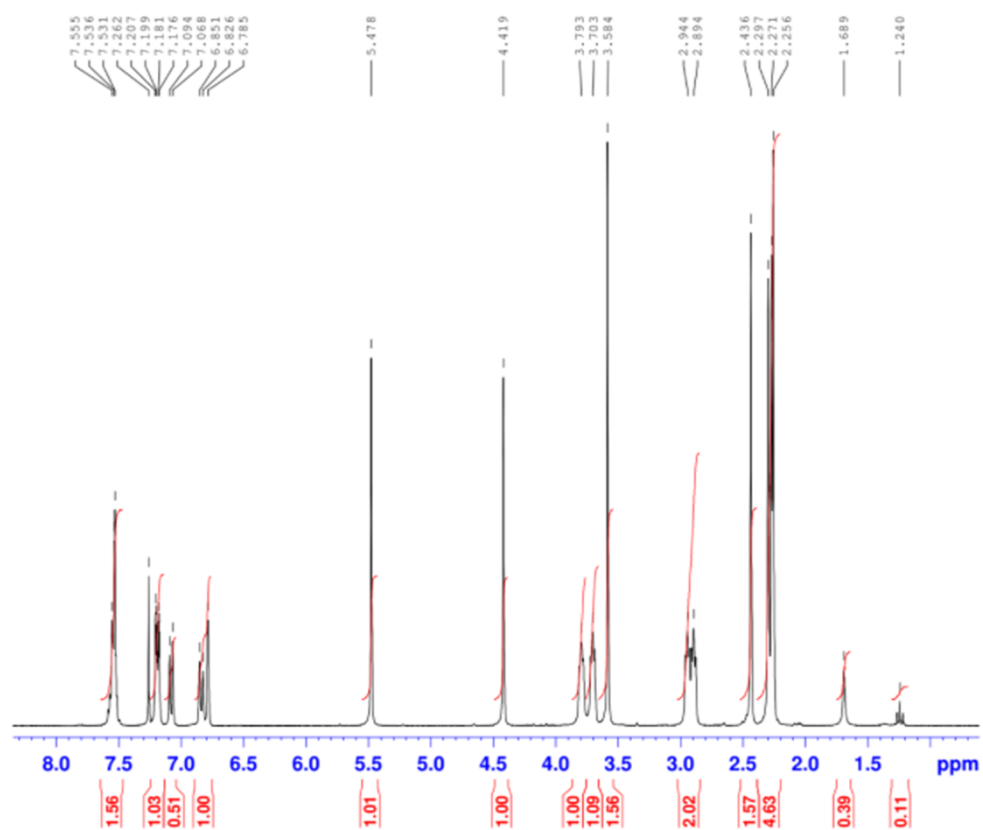

5a

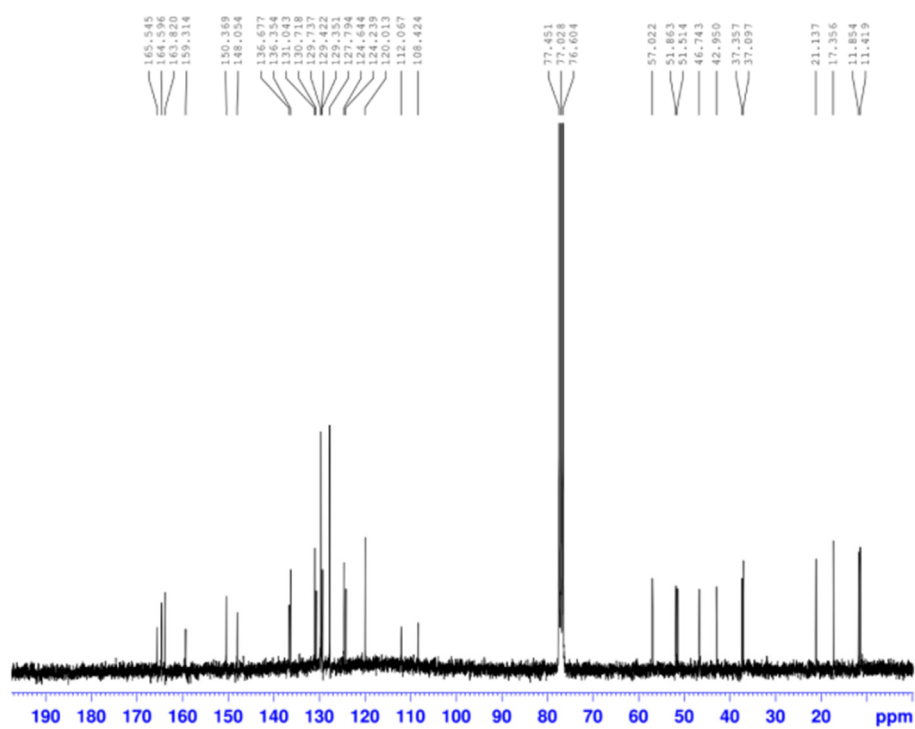

5a

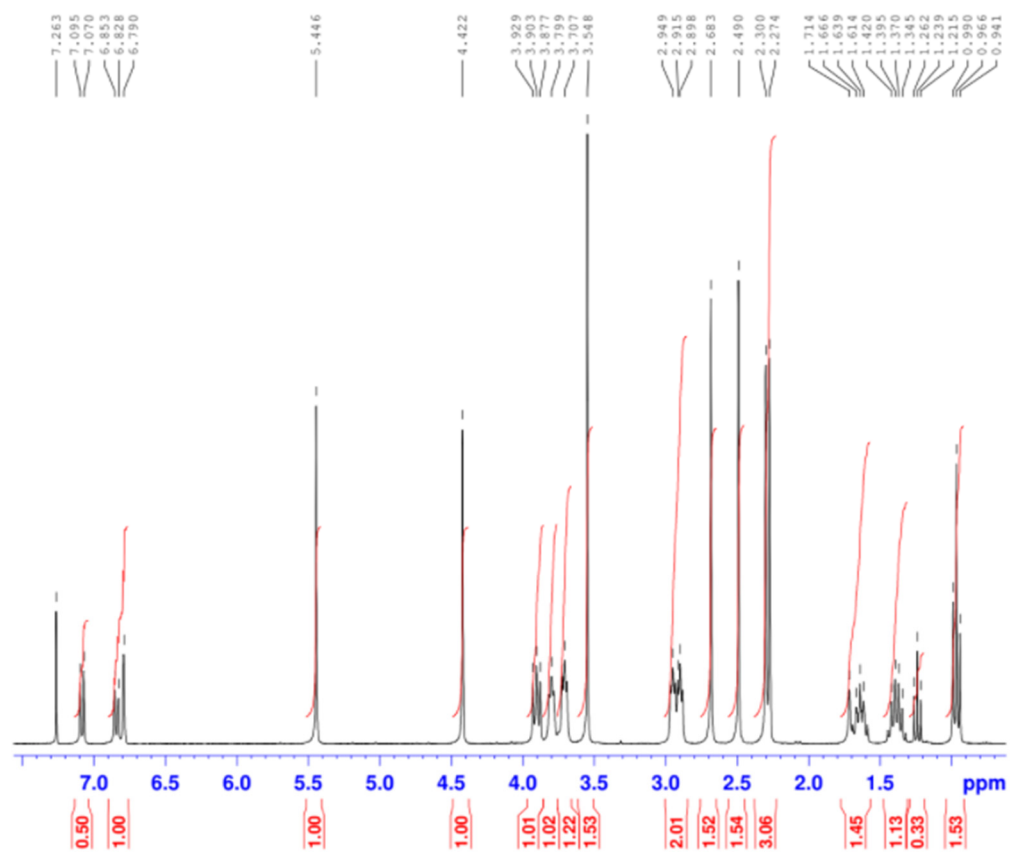

5b

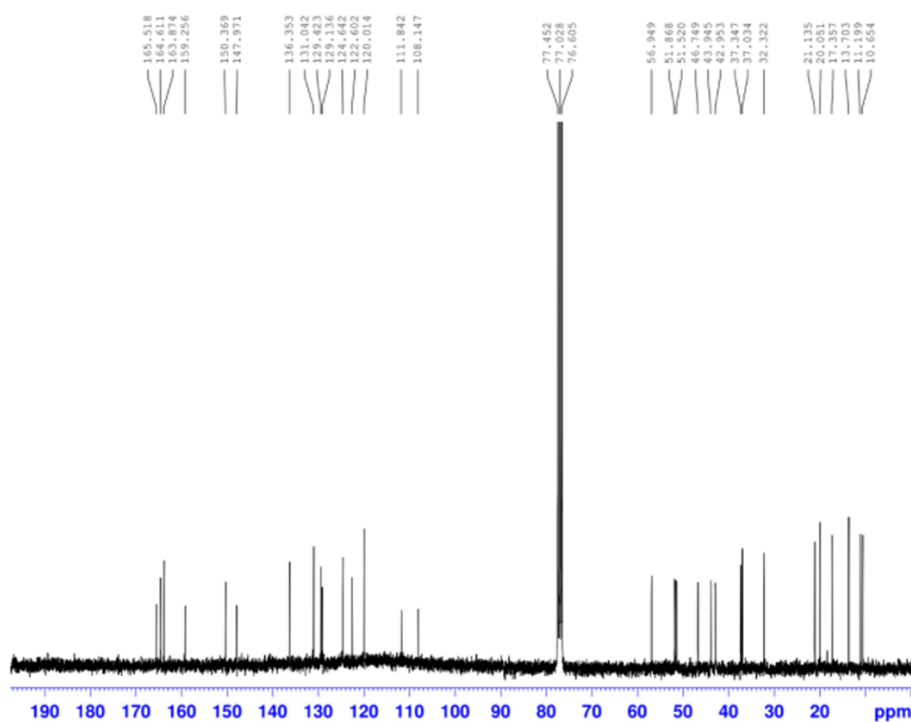

5b



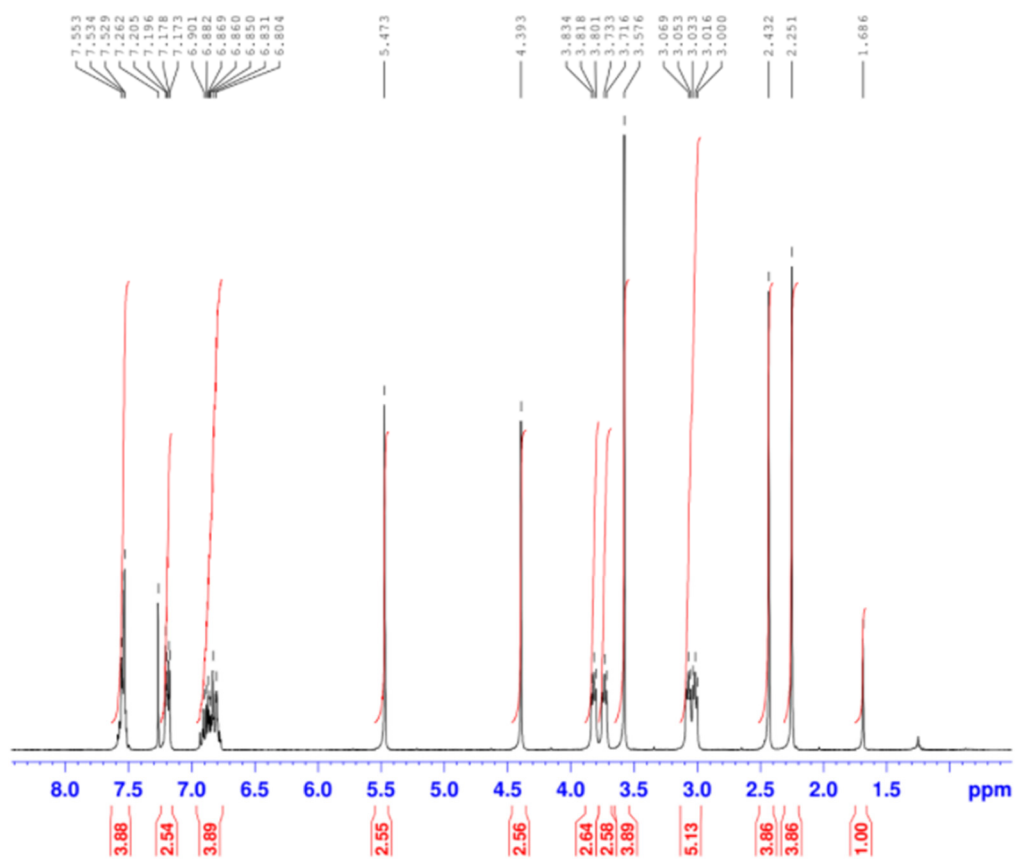

6a

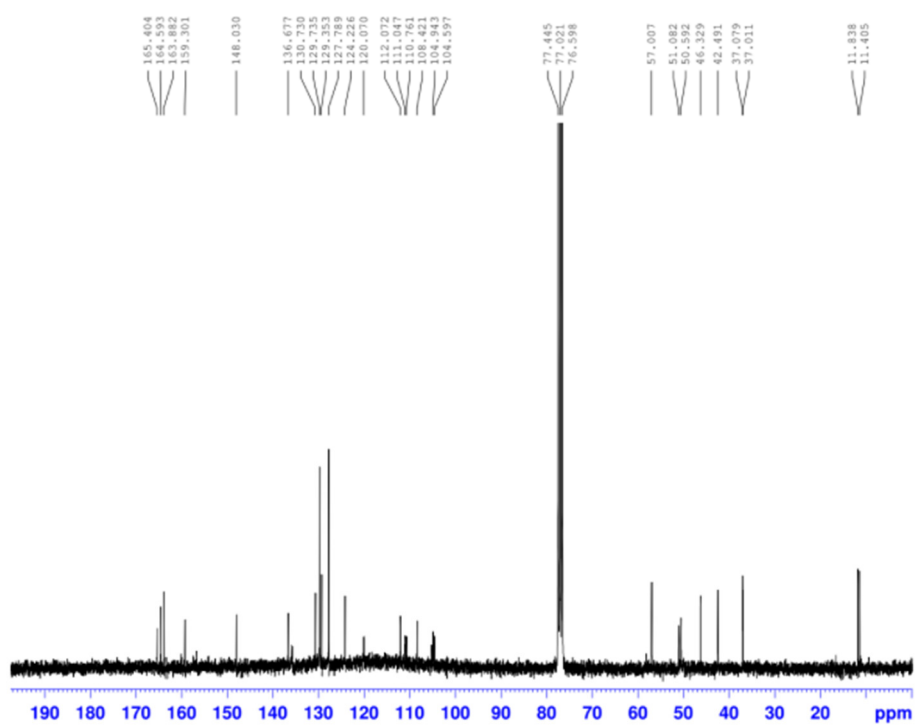

6a

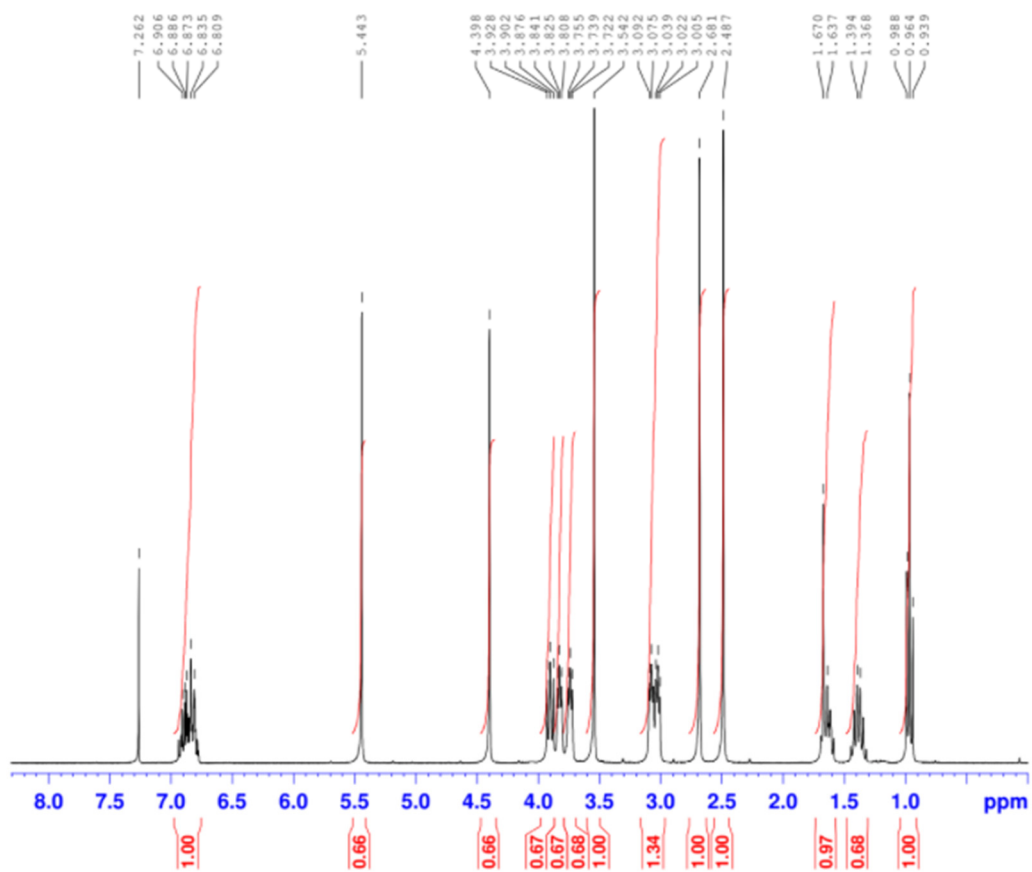

6b

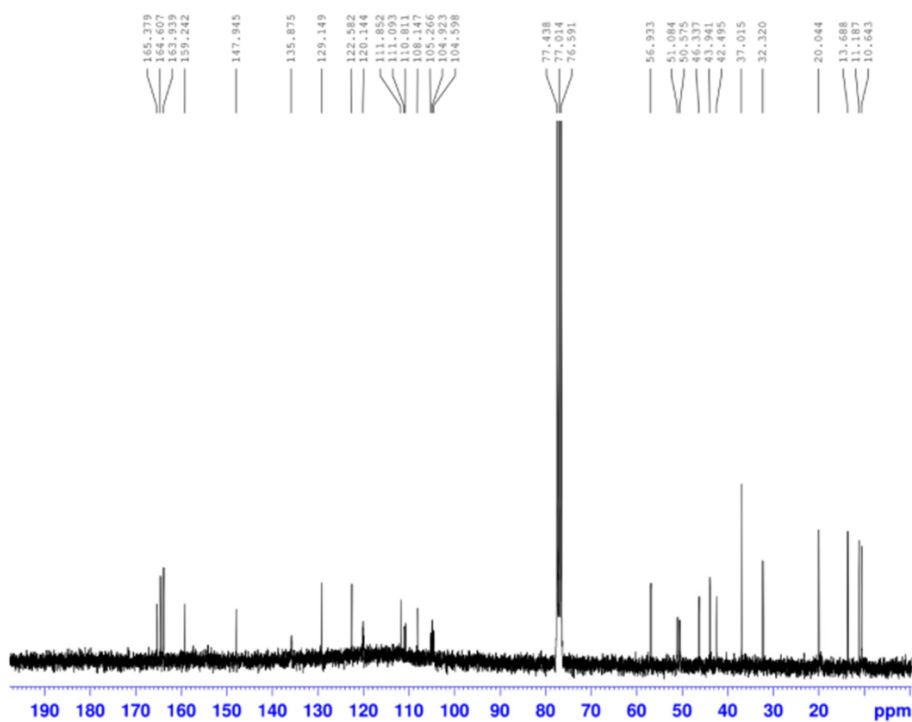

6b

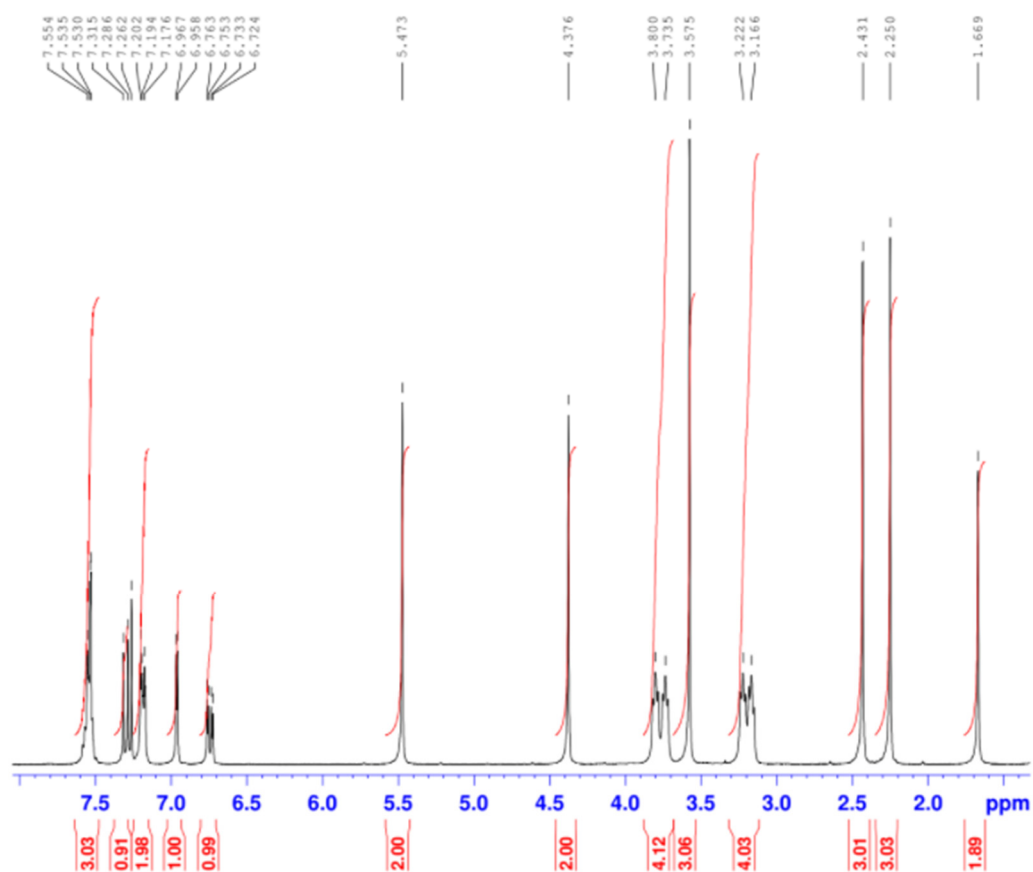

7a

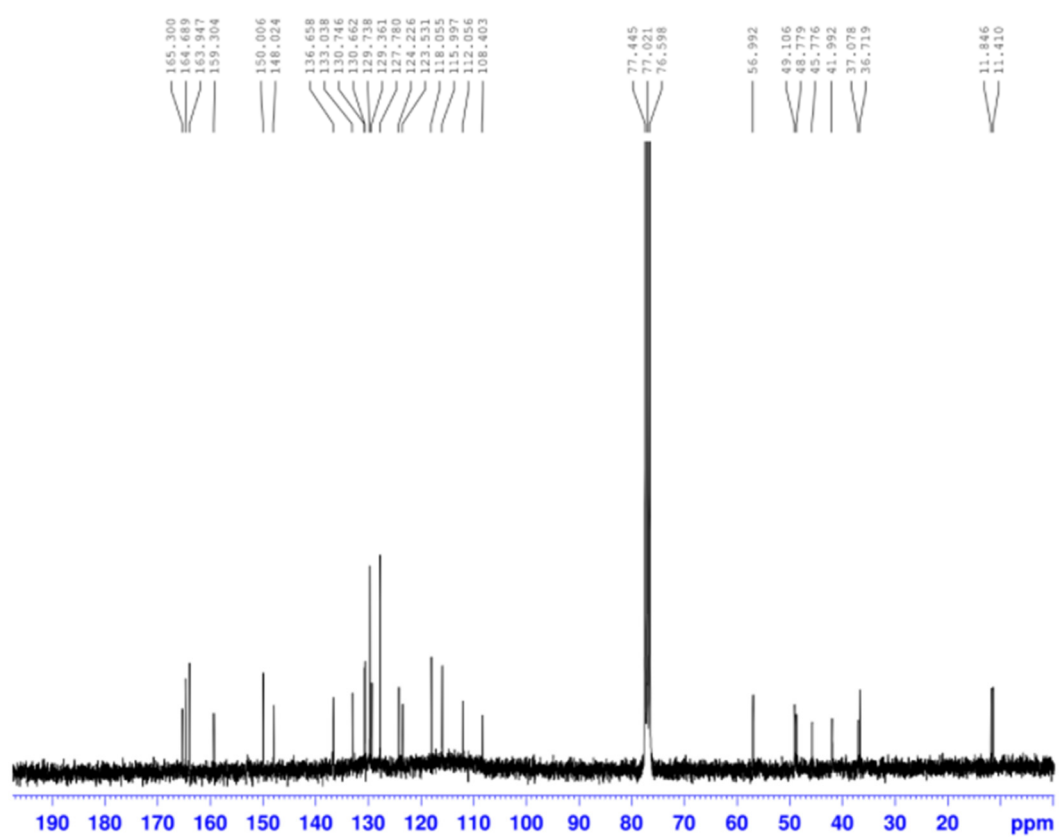

7a

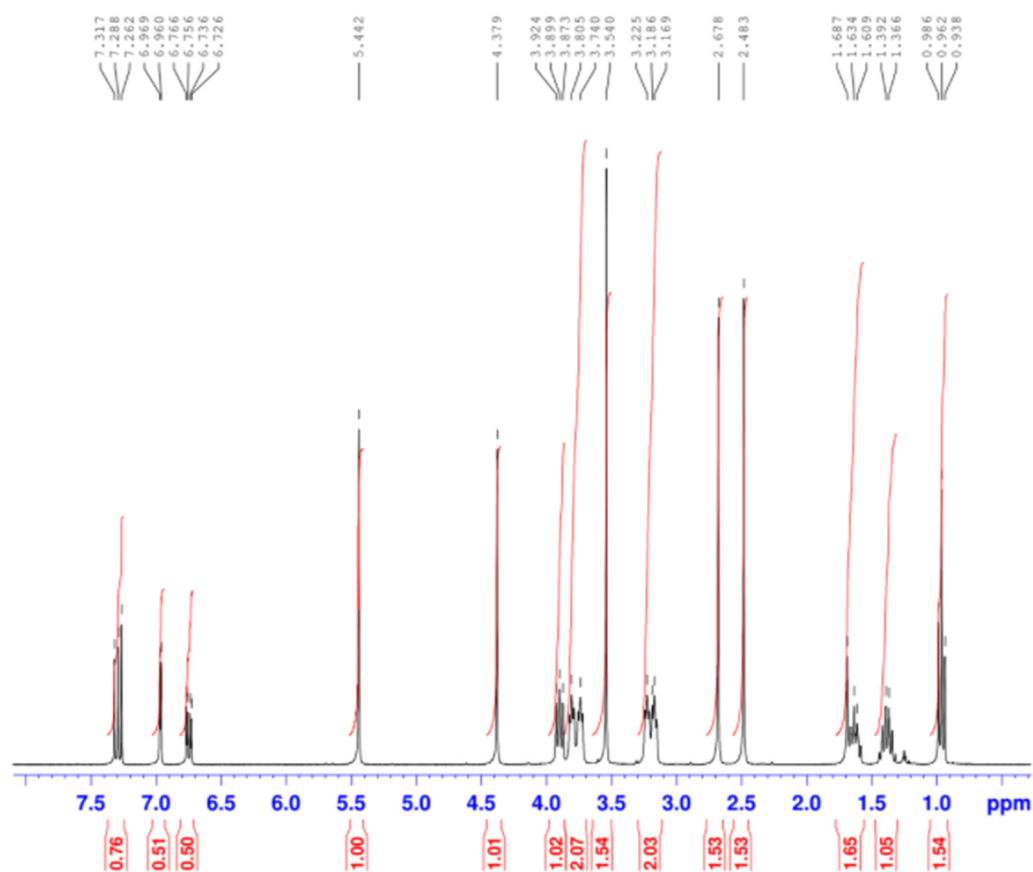

7b

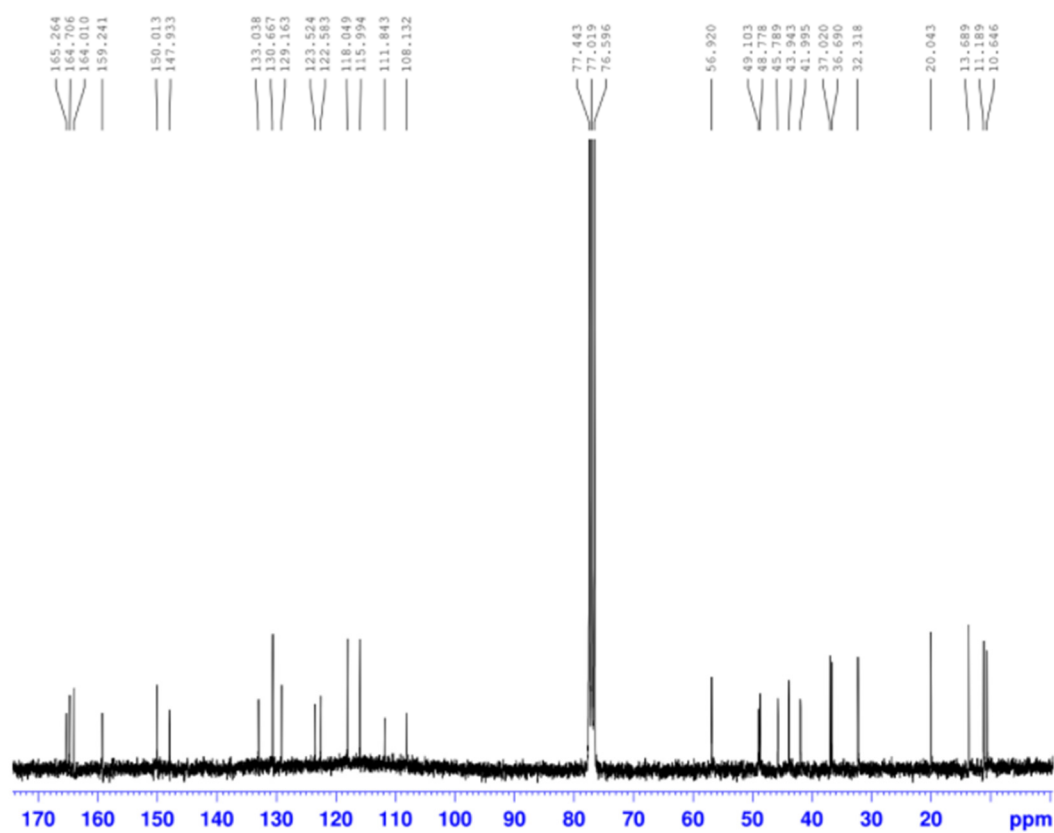

7b

**Table S3. IR spectra of new compounds**

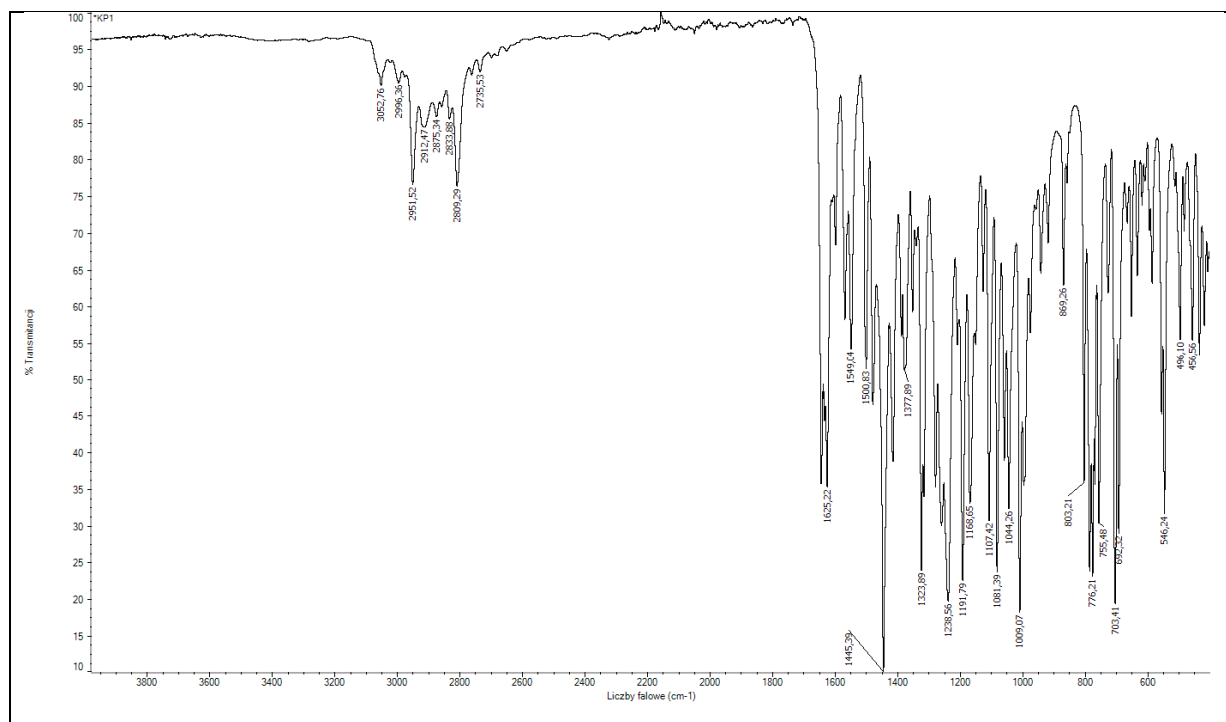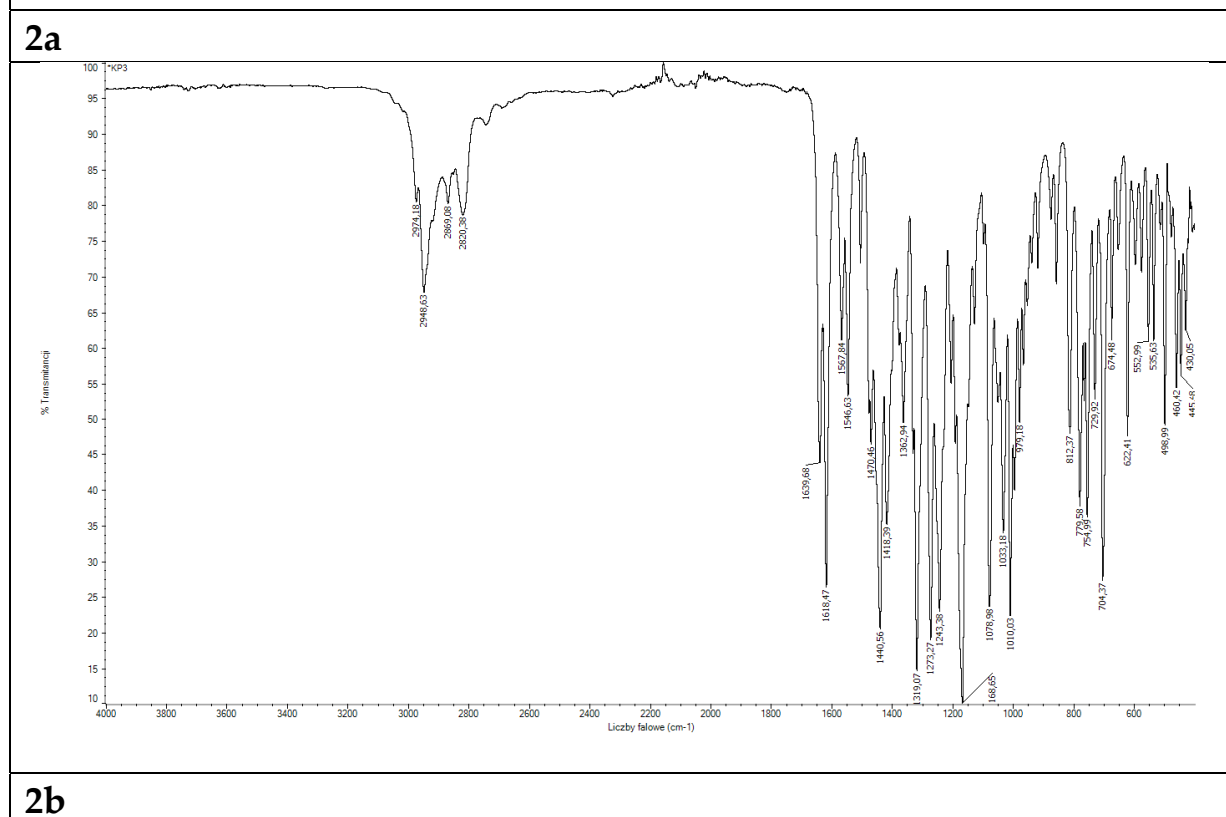

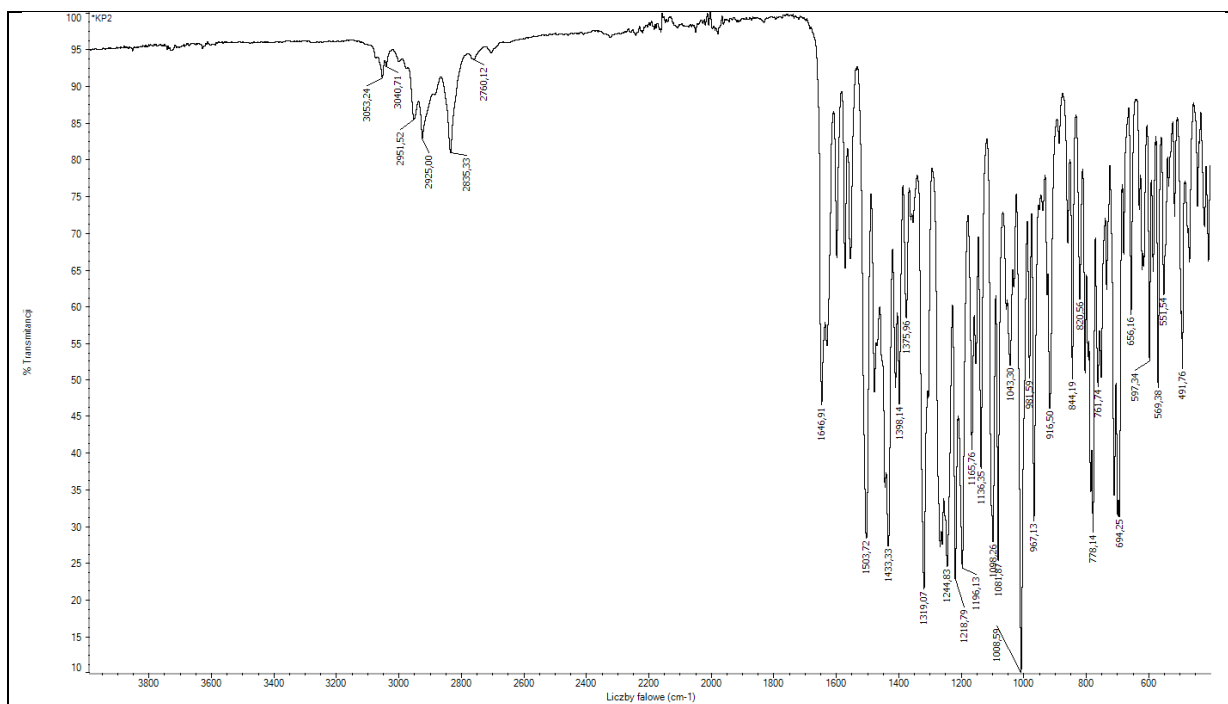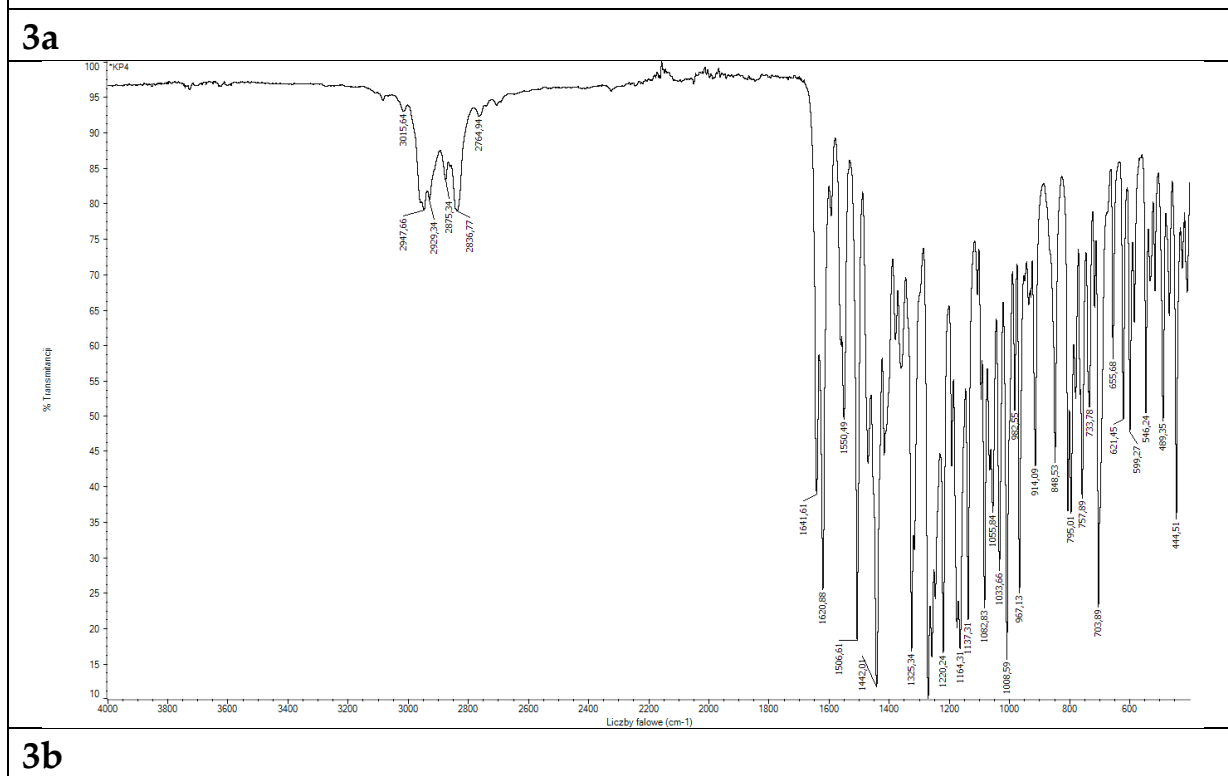

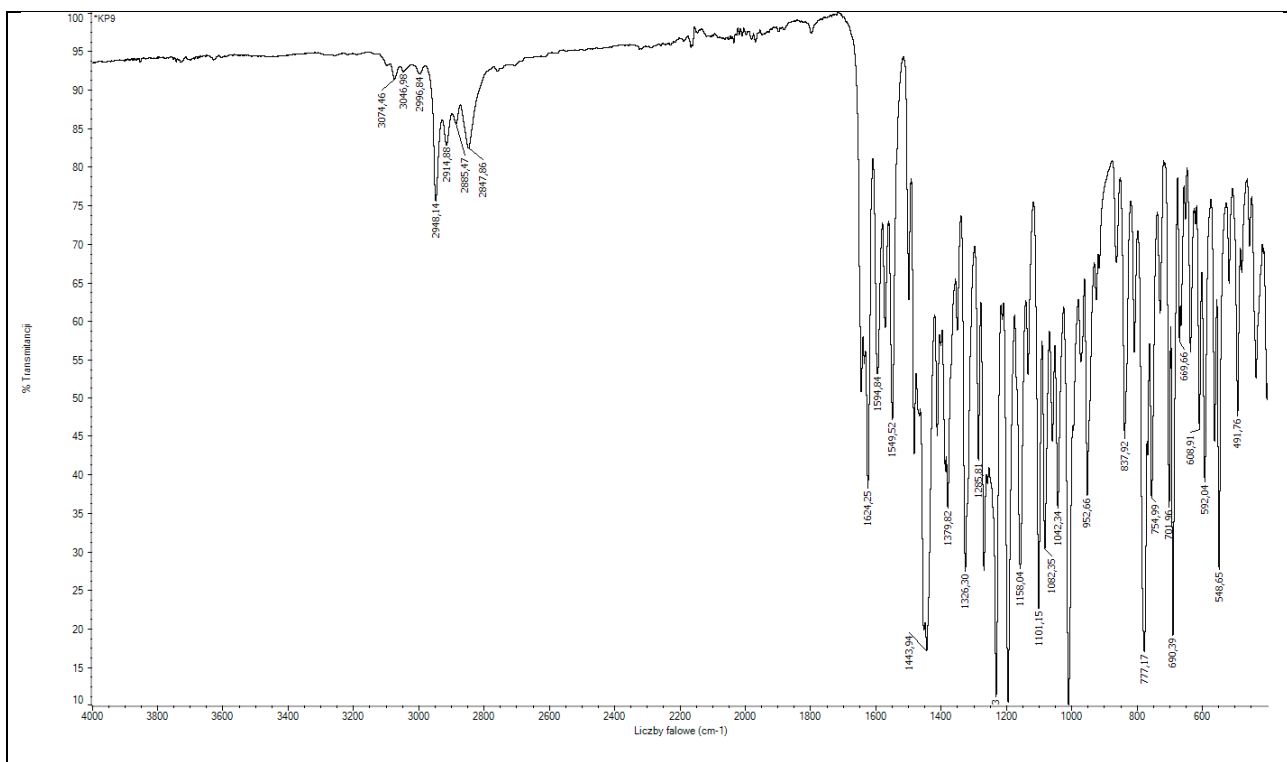

4a

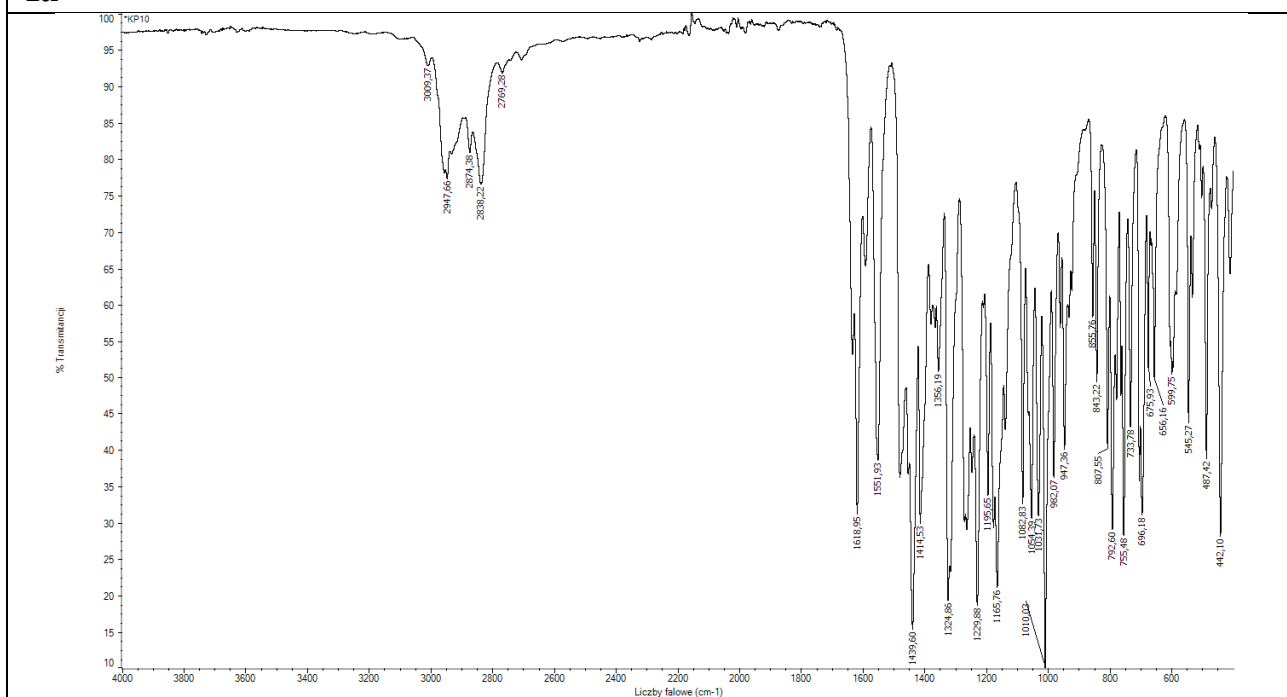

4b

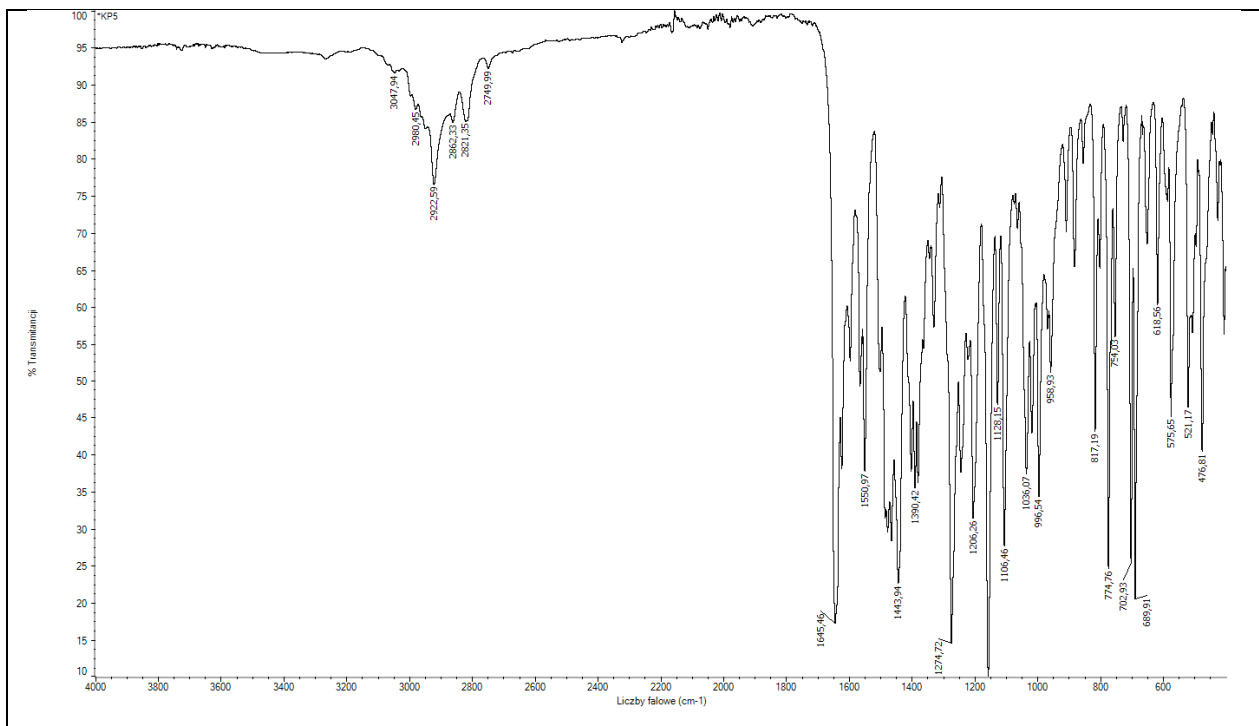

5a

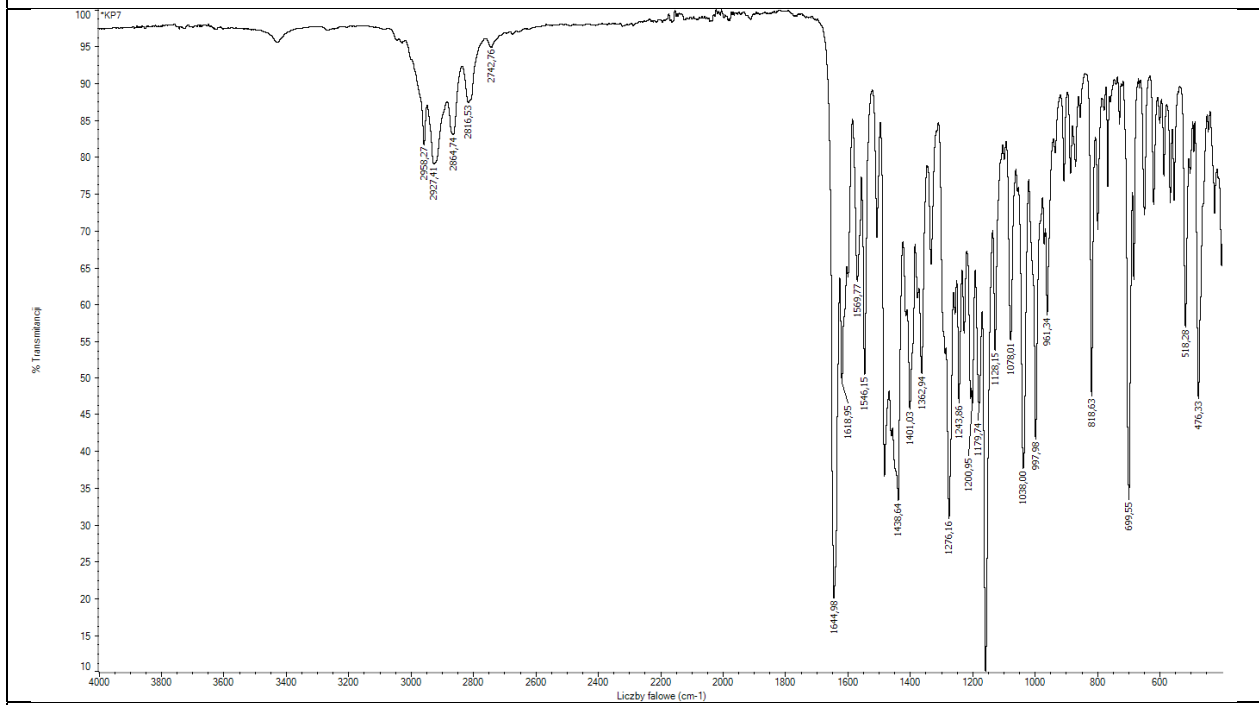

5b



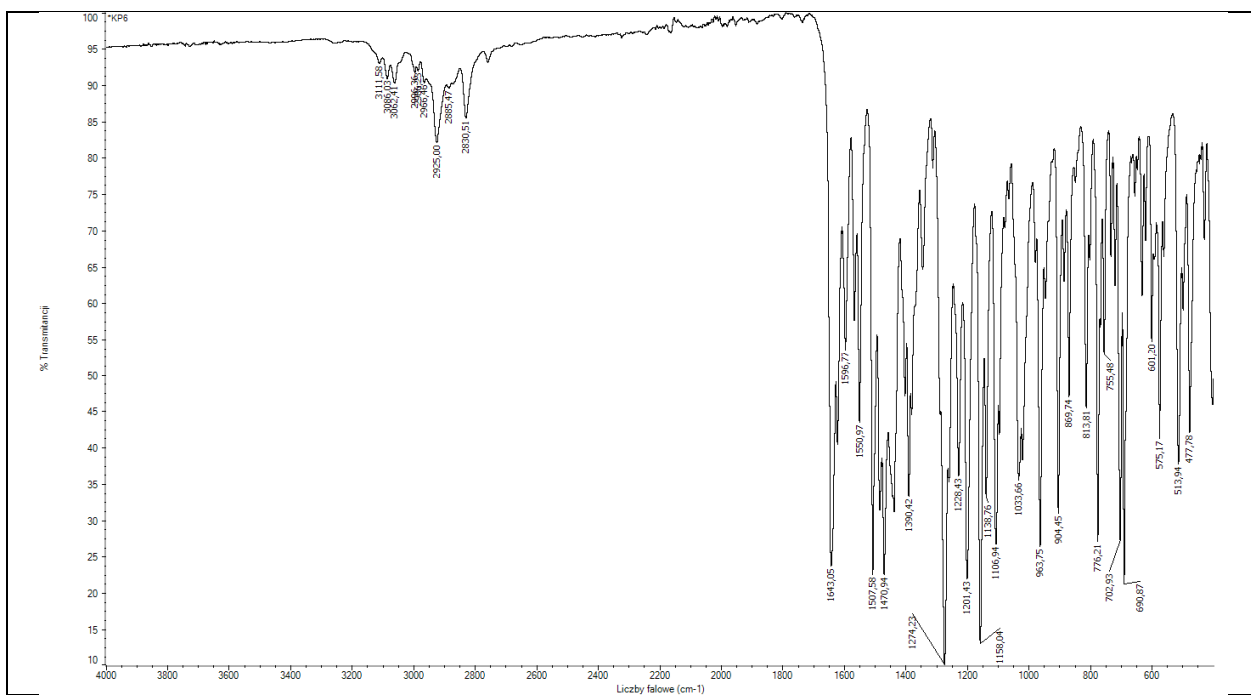

6a

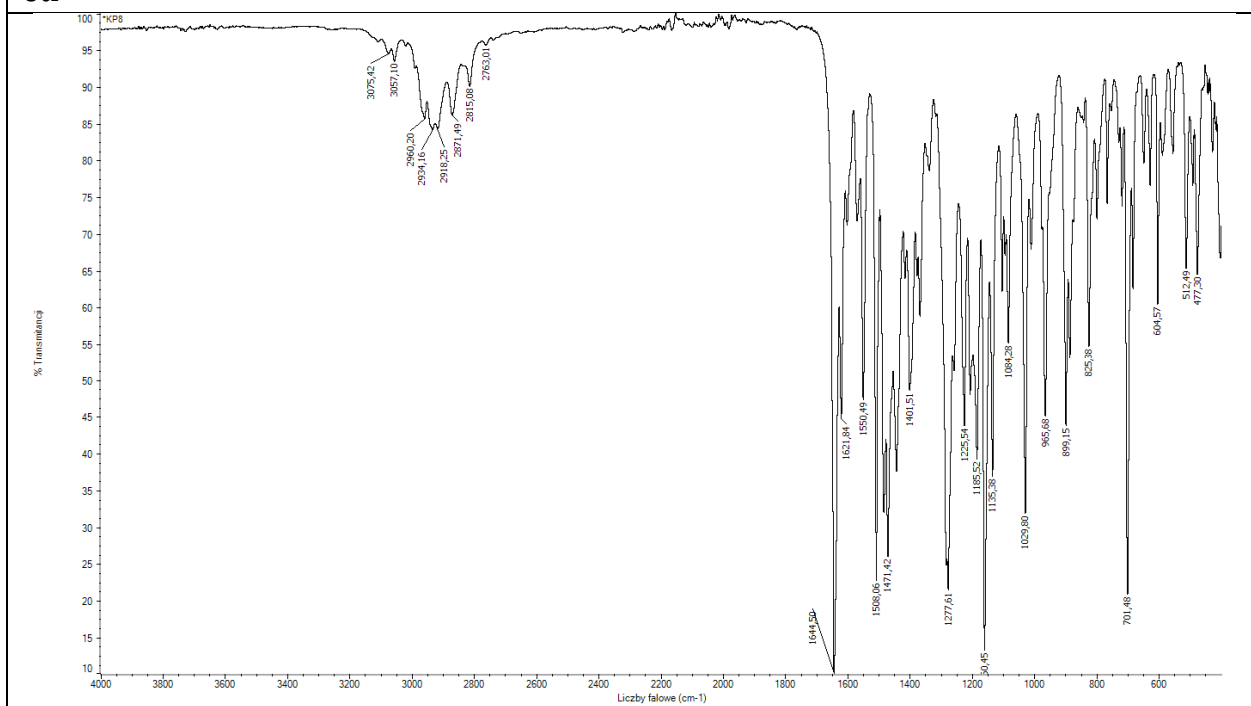

6b

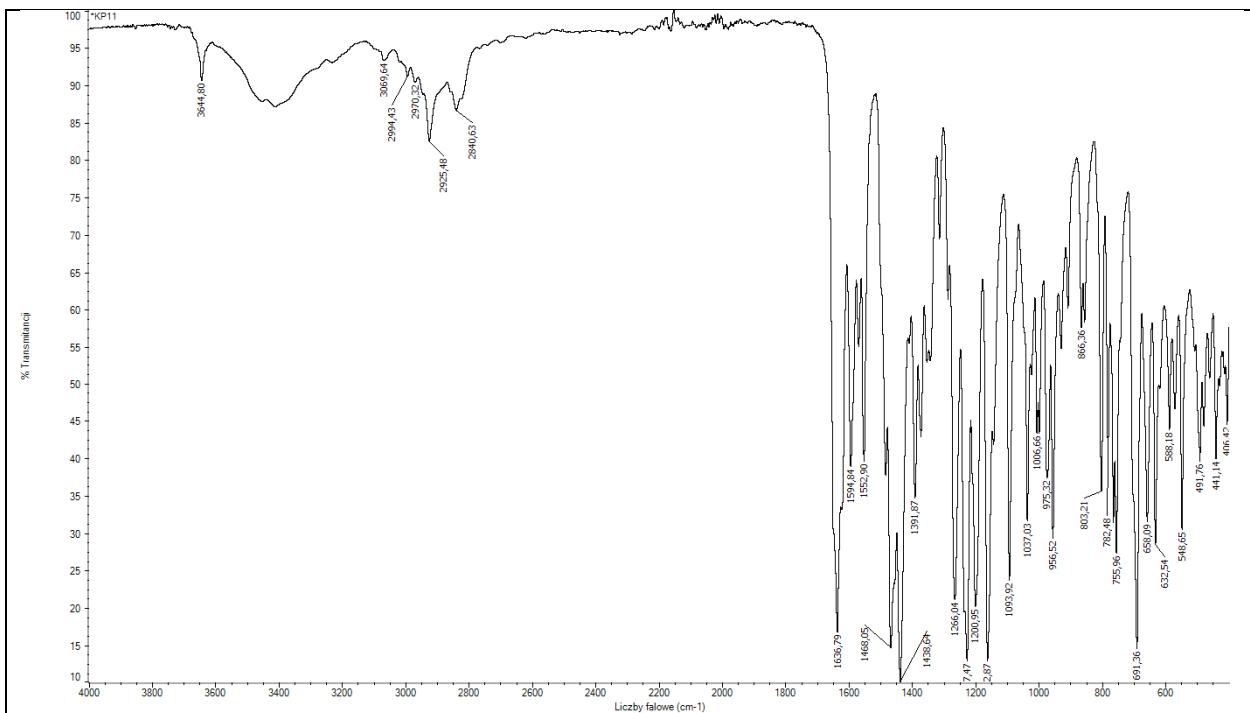

7a

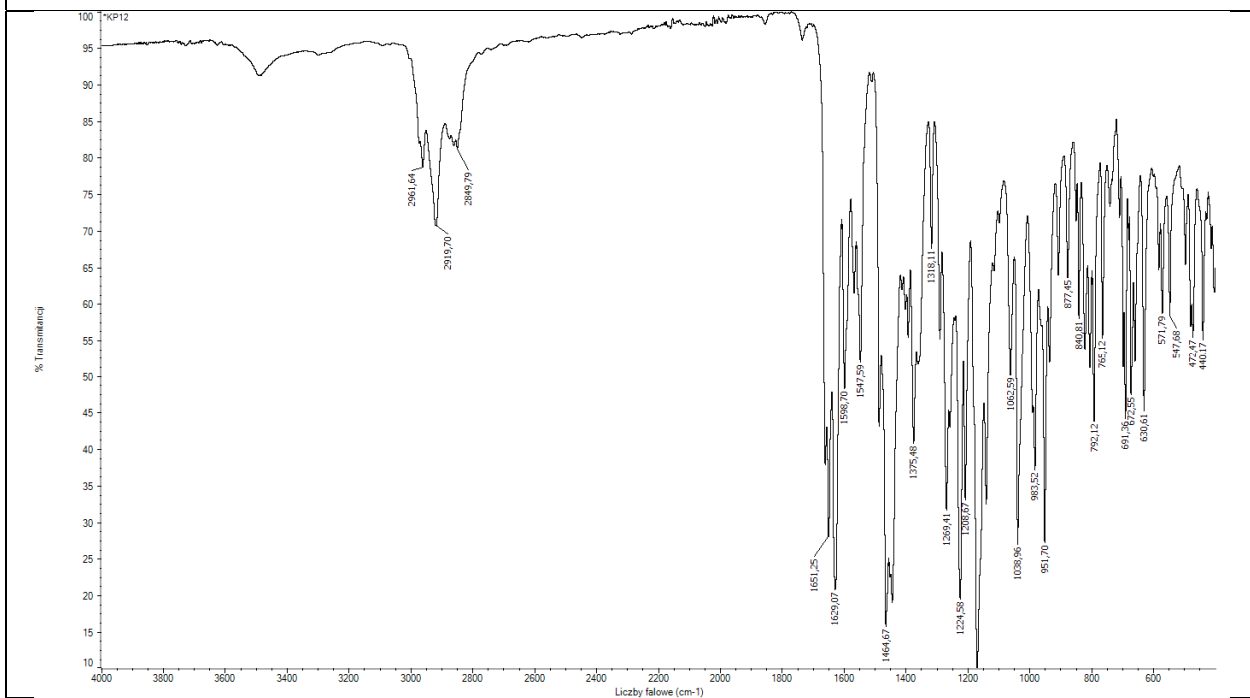

7b

**Table S4.** Mass spectra of new compounds

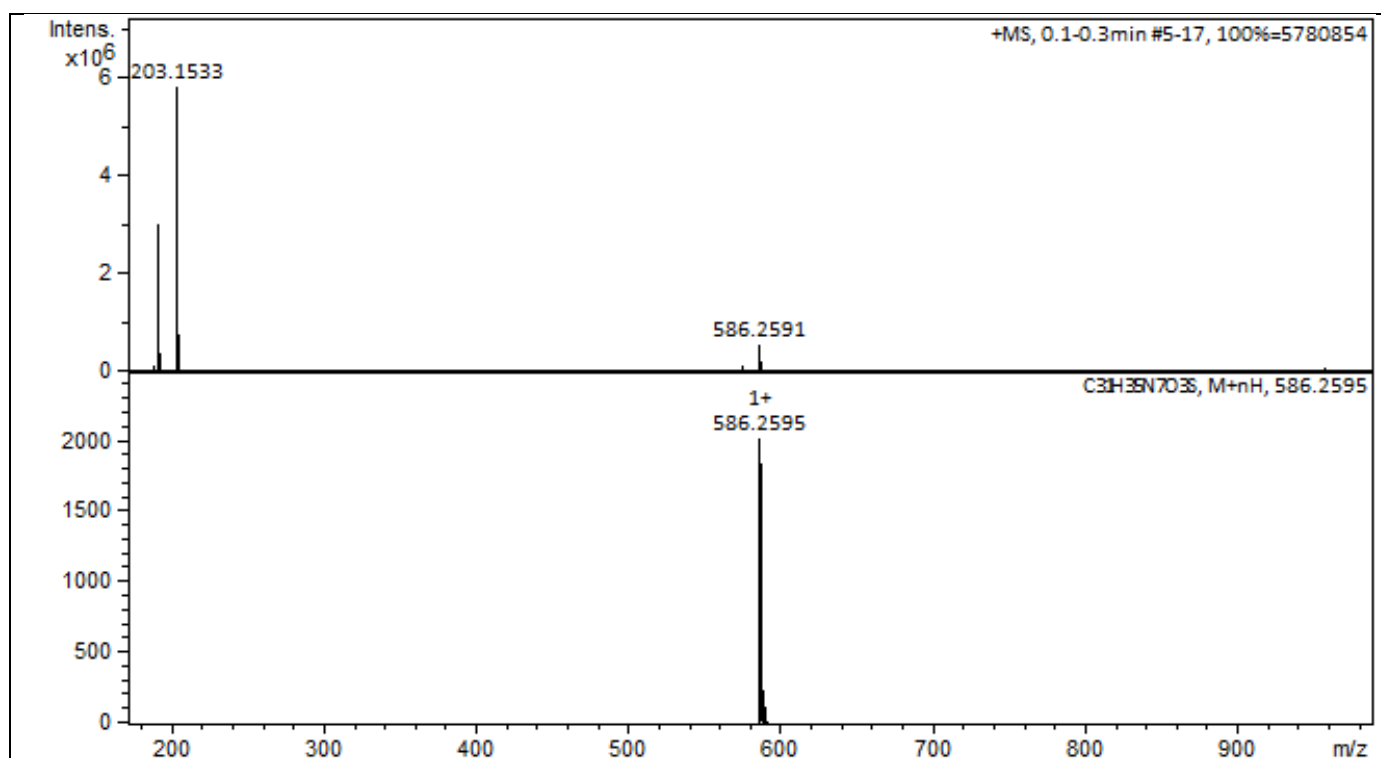

**2a**

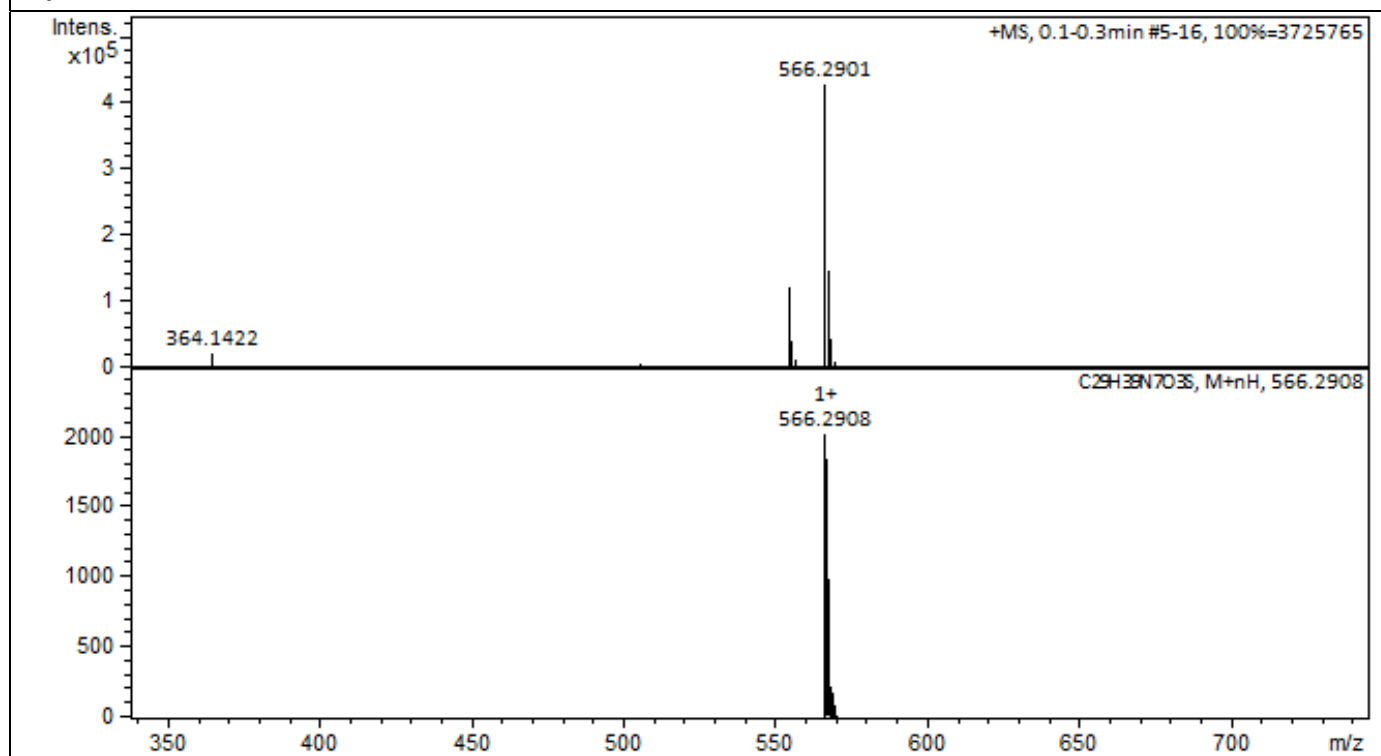

**2b**

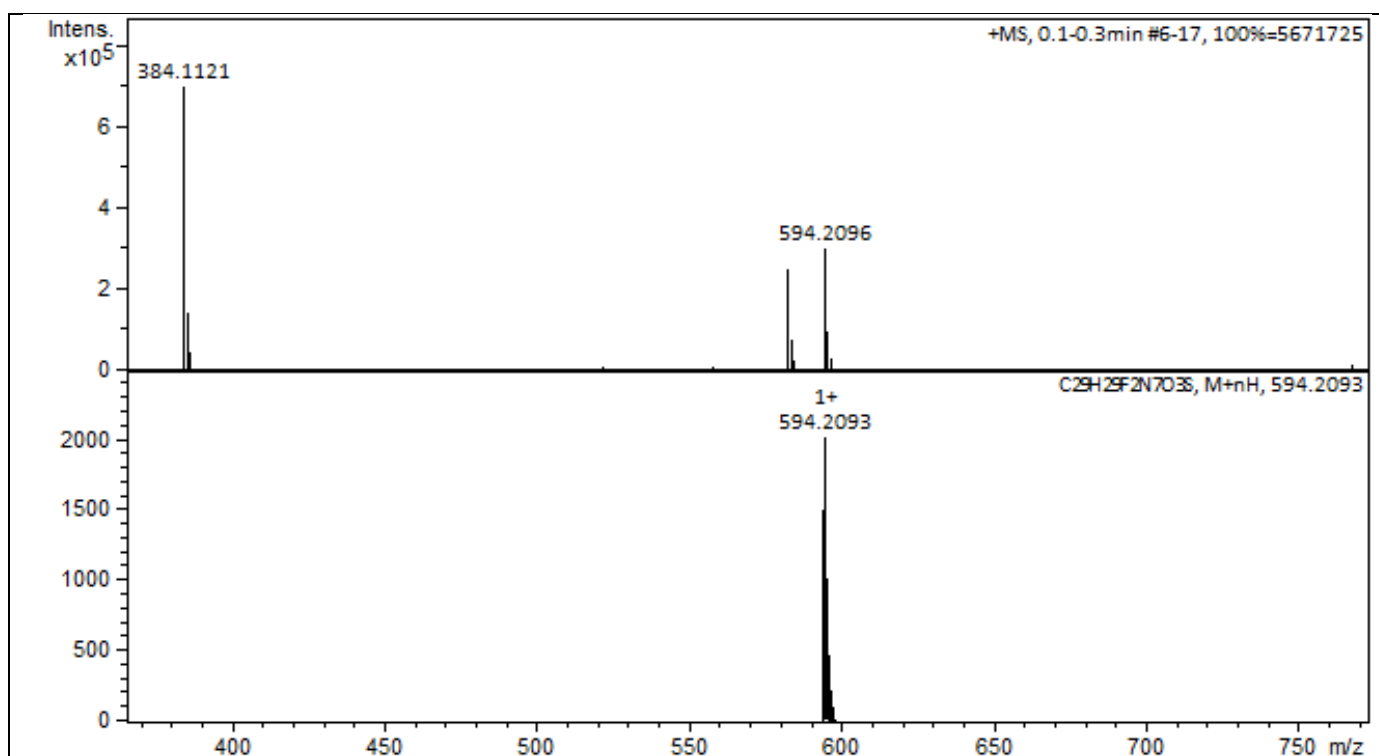

3a

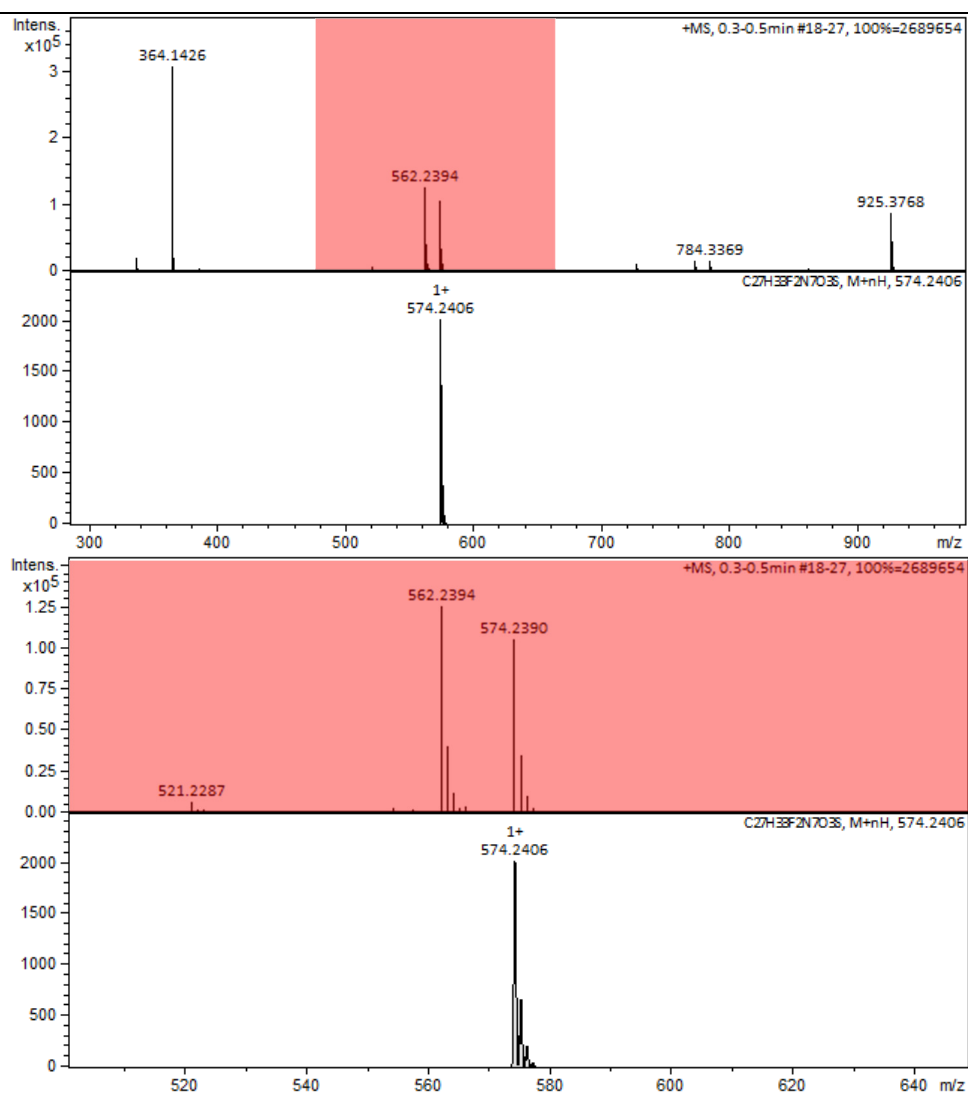

3b

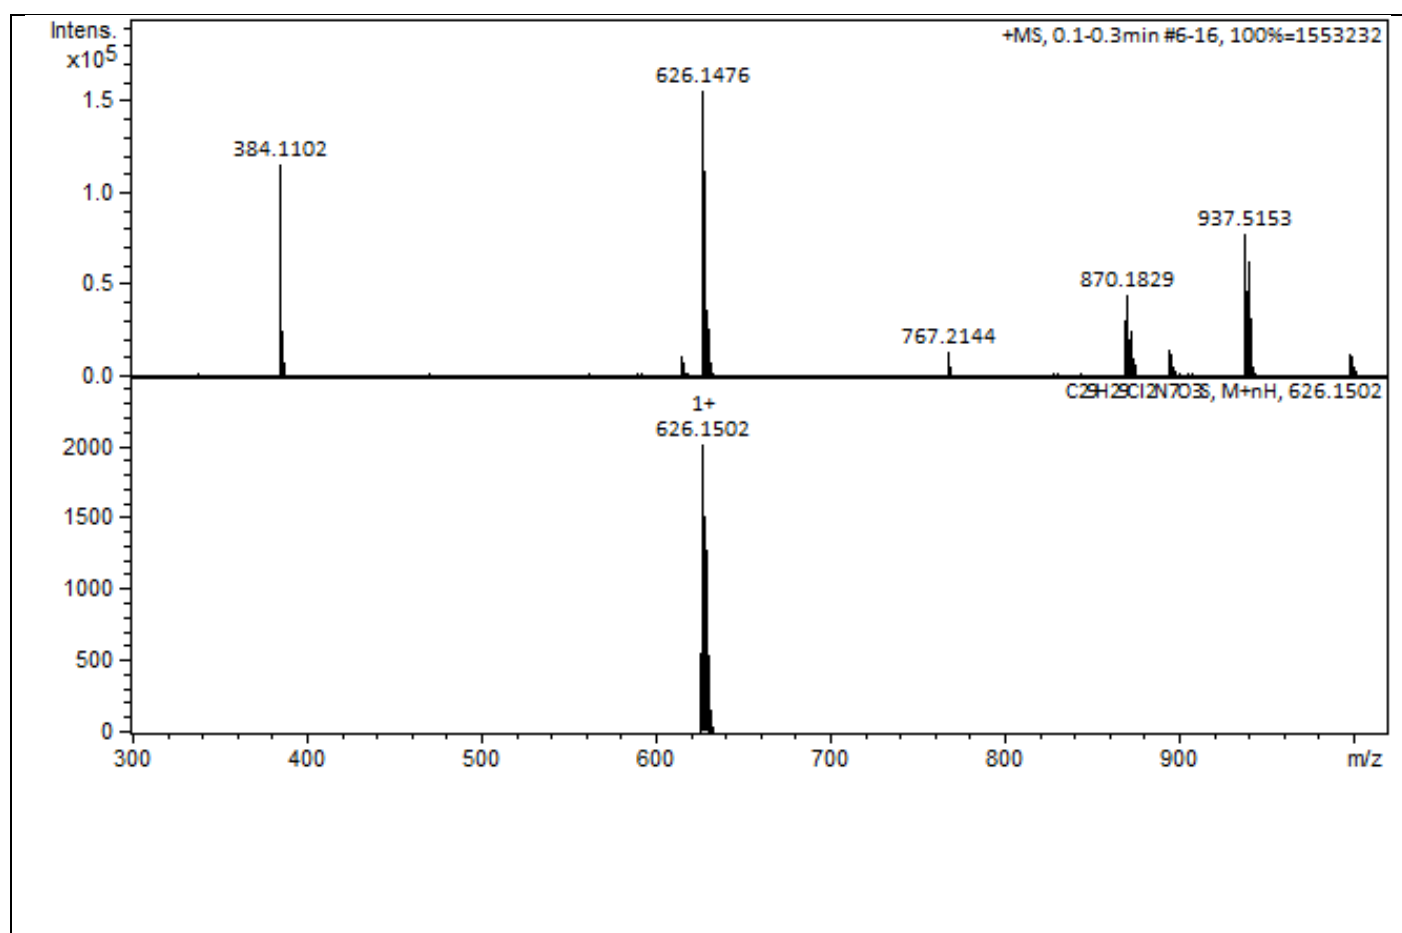

4a

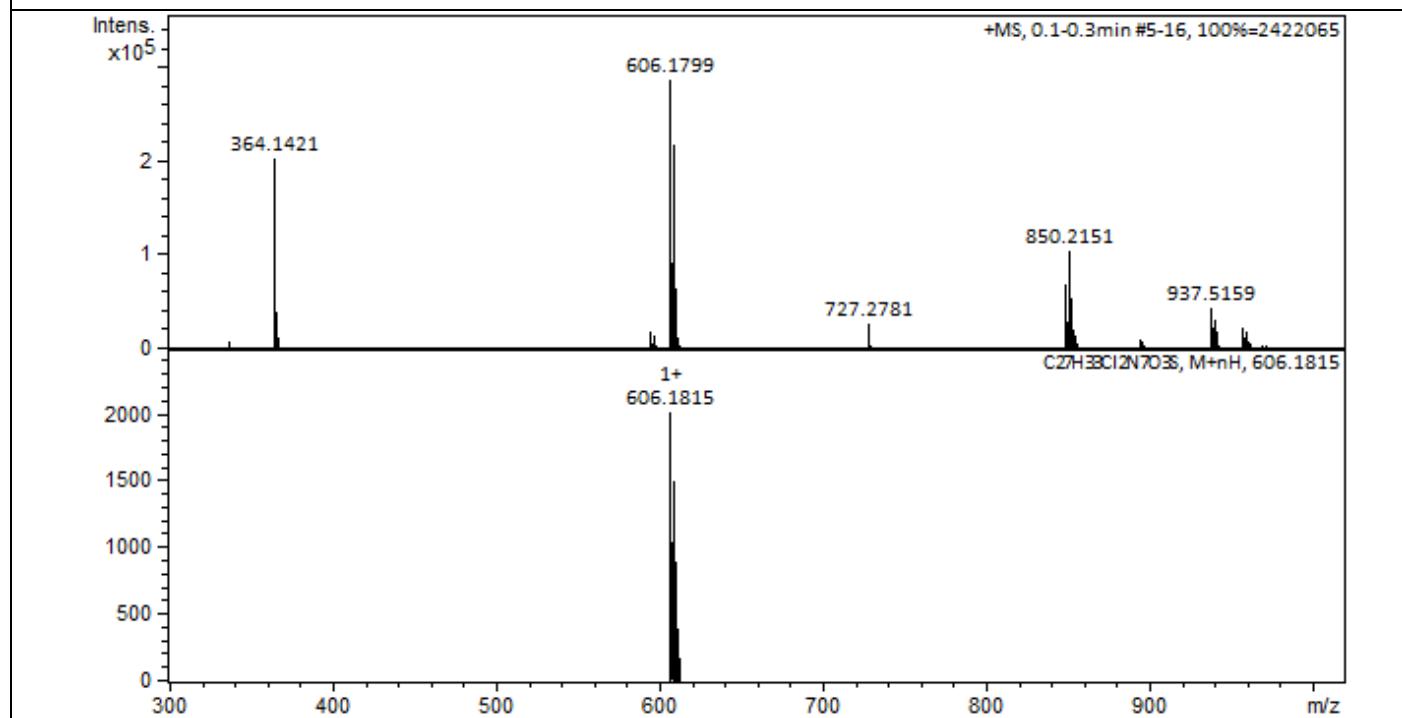

4b

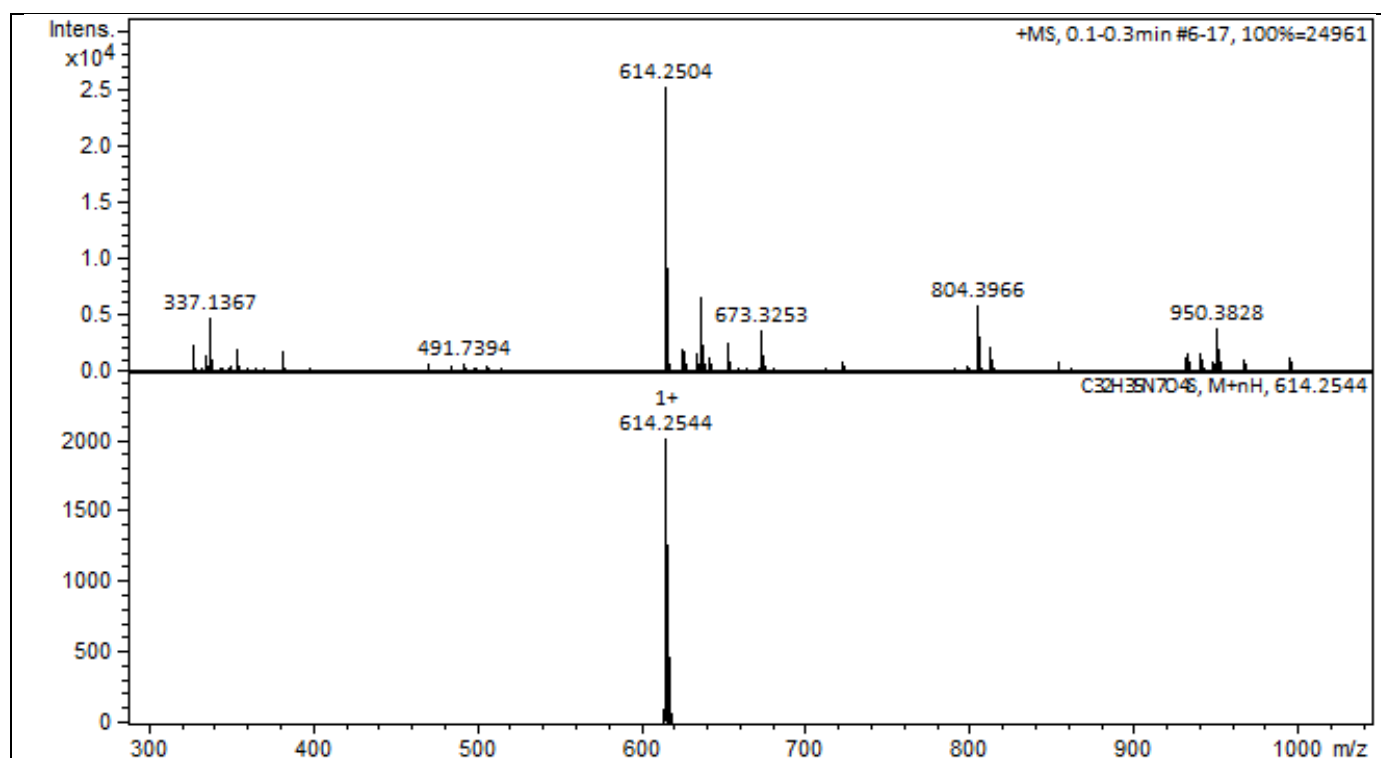

5a

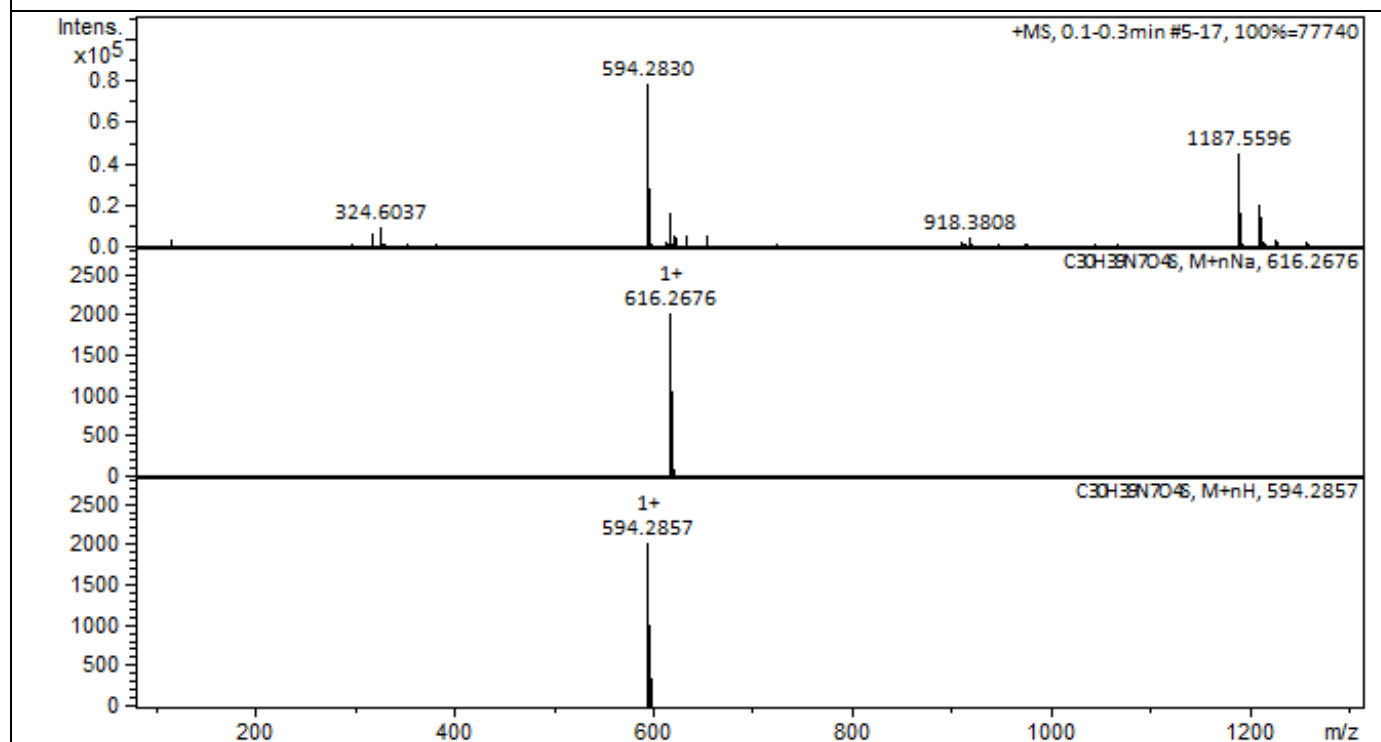

5b

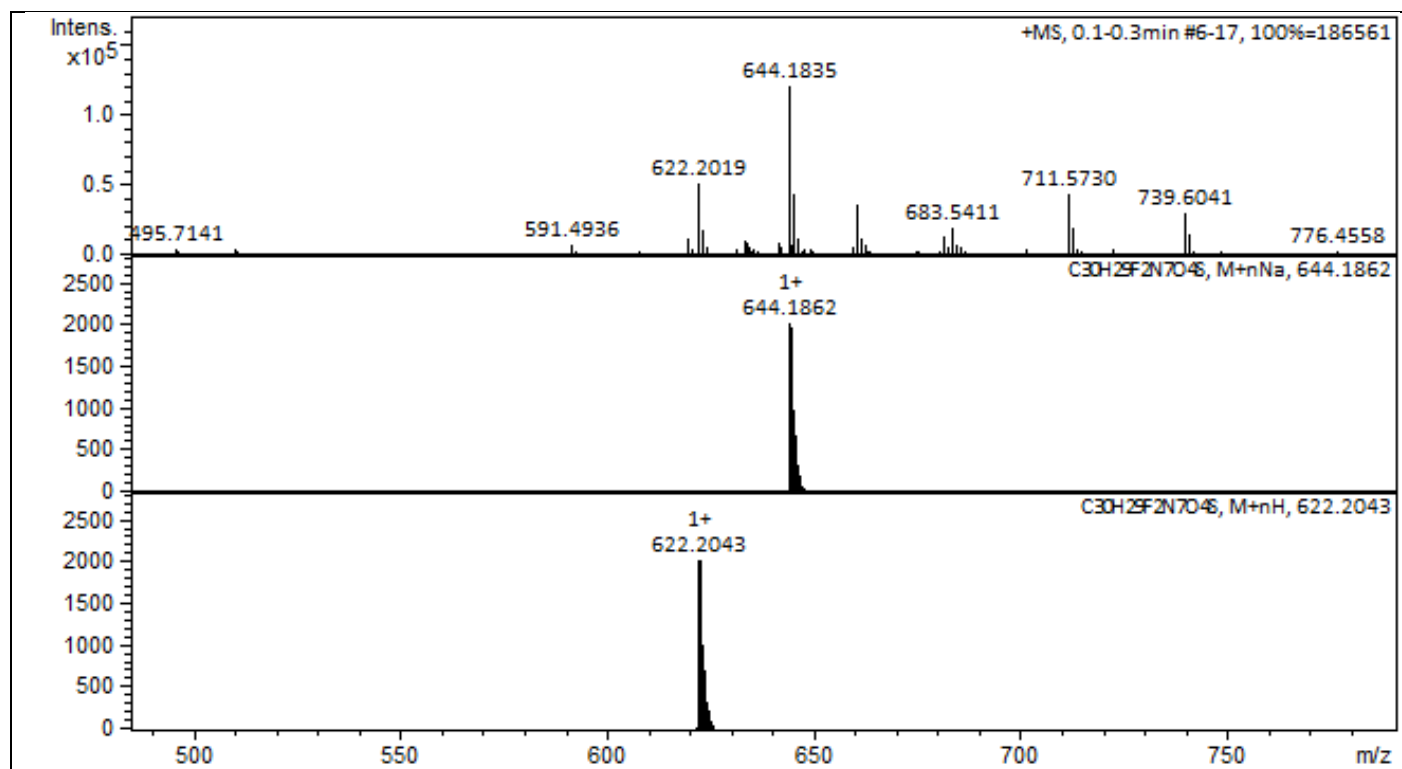

6a

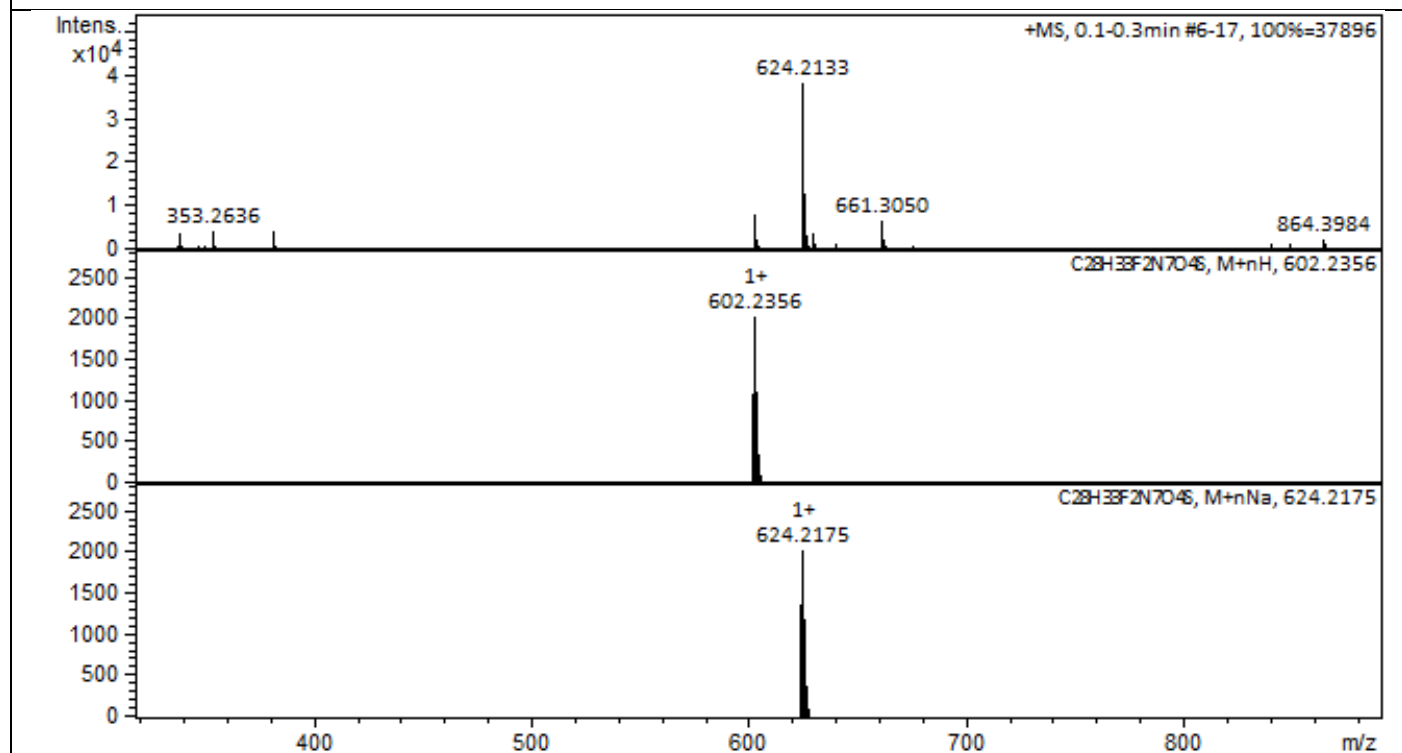

6b

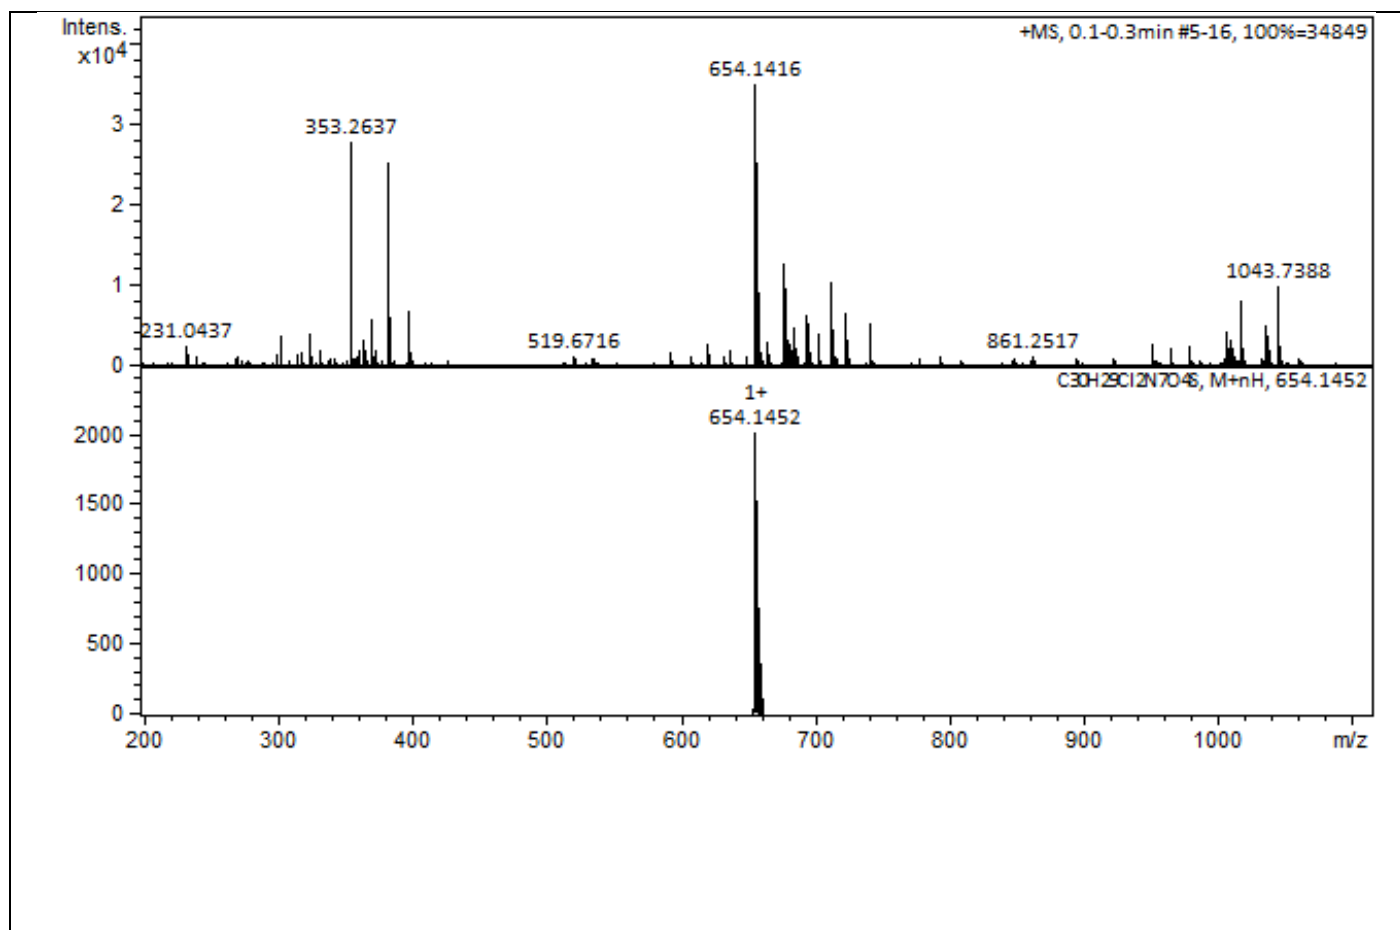

7a

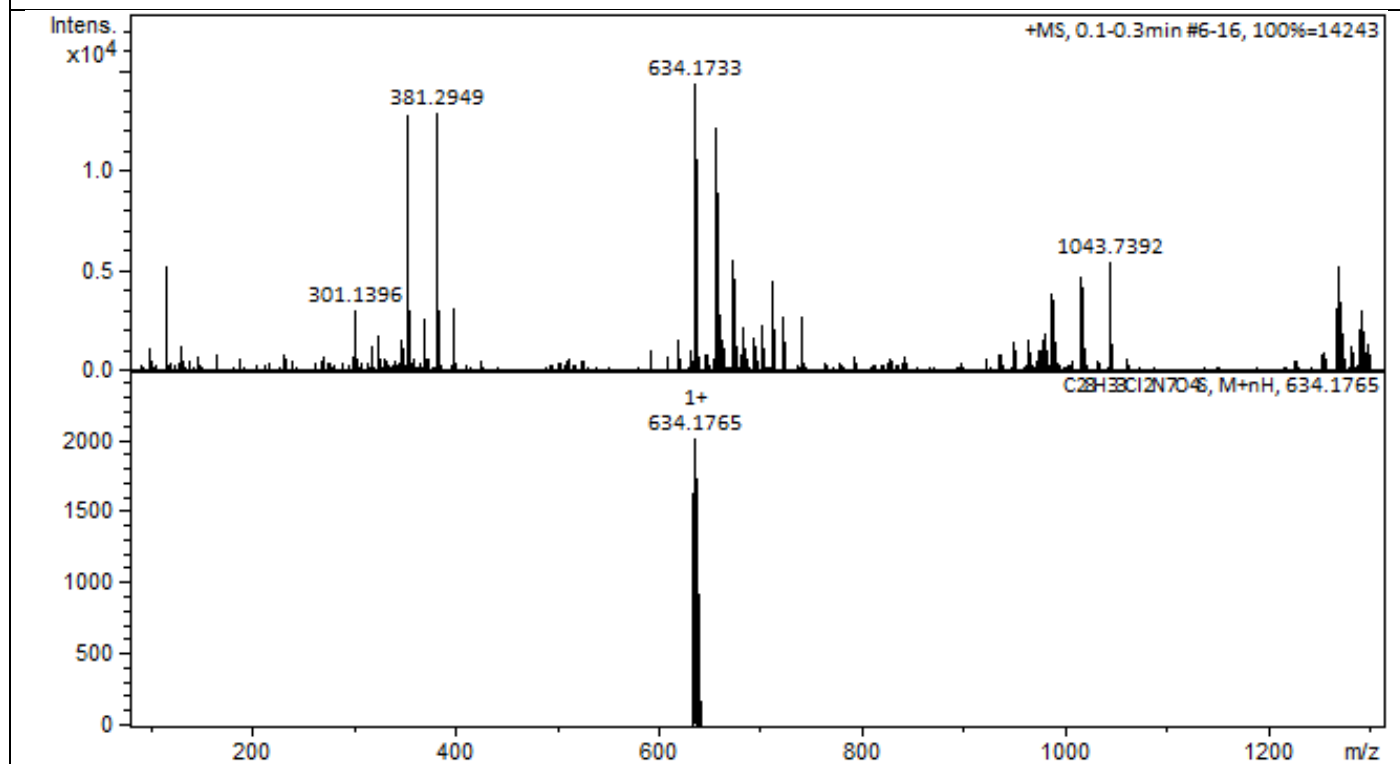

7b



**Table S5.** The 2D intermolecular interactions of investigated compounds in the active site of COX

**Figure S1.** The intermolecular interactions of **2a** in the active centre of a) COX-1 b) COX-2

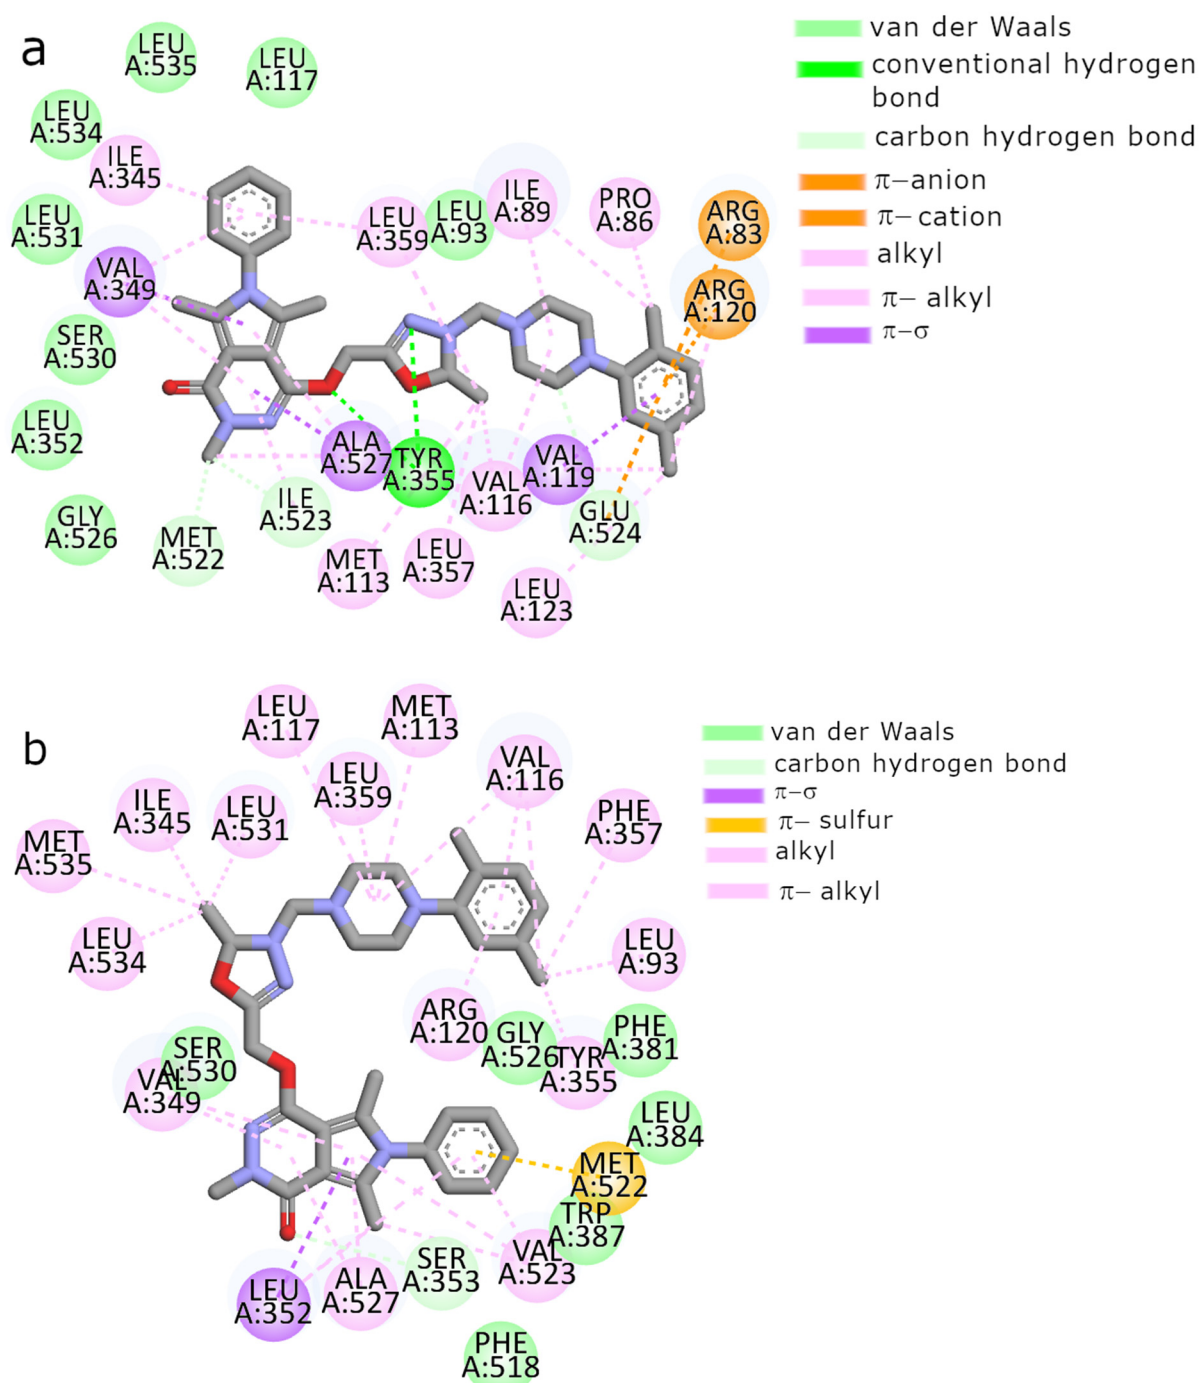

**Figure S2.** The intermolecular interactions of **2b** in the active centre of a) COX-1 b) COX-2

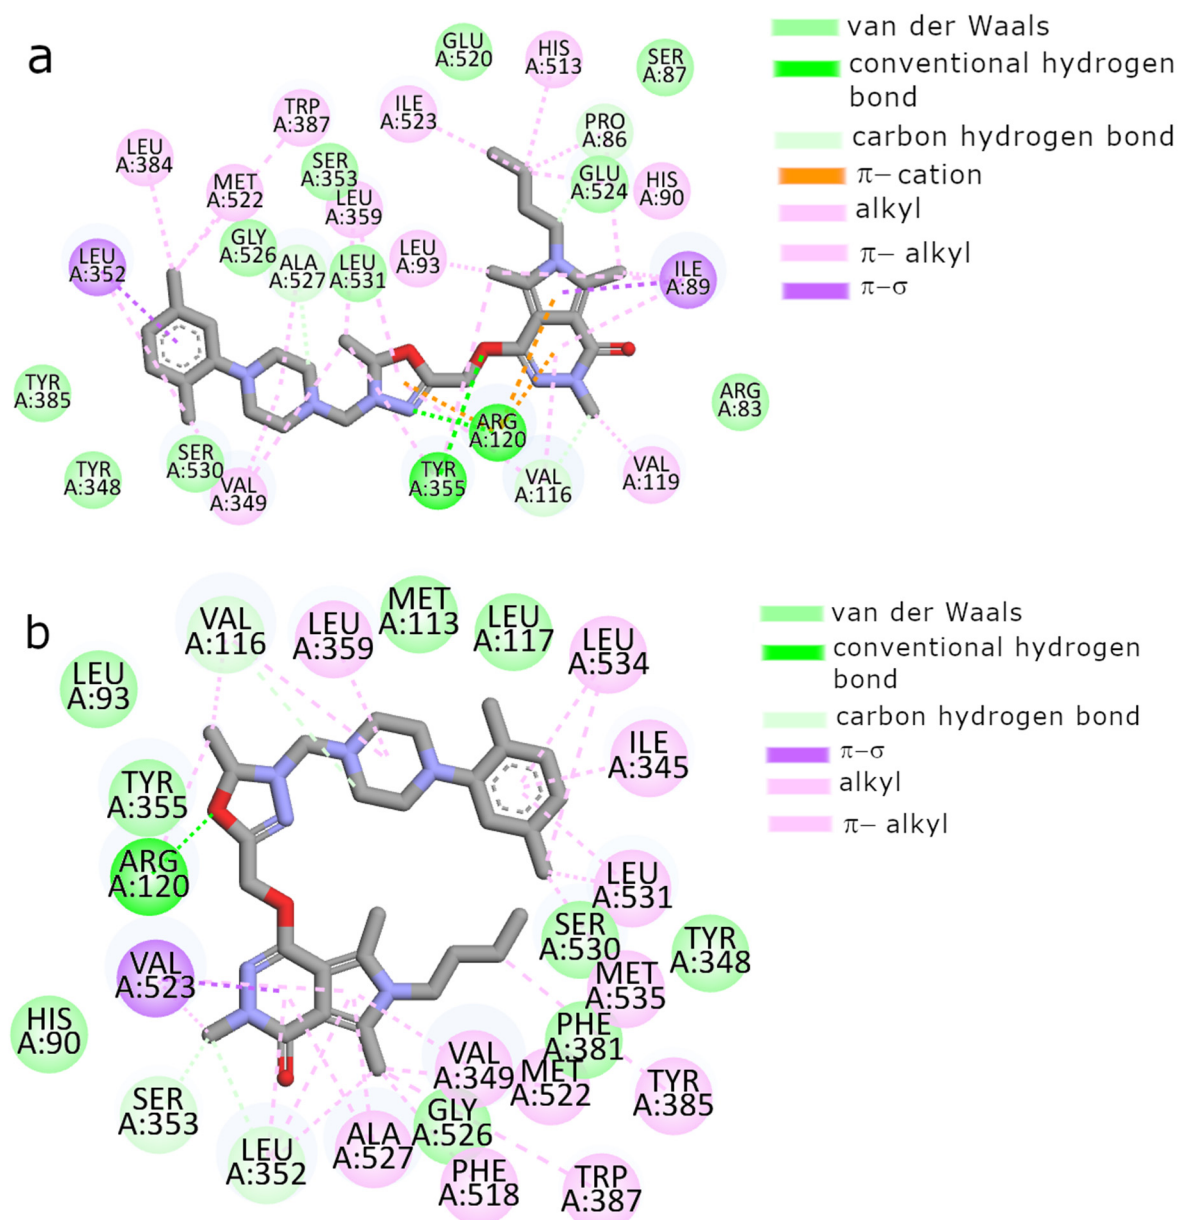

**Figure S3.** The intermolecular interactions of **3a** in the active centre of a) COX-1 b) COX-2

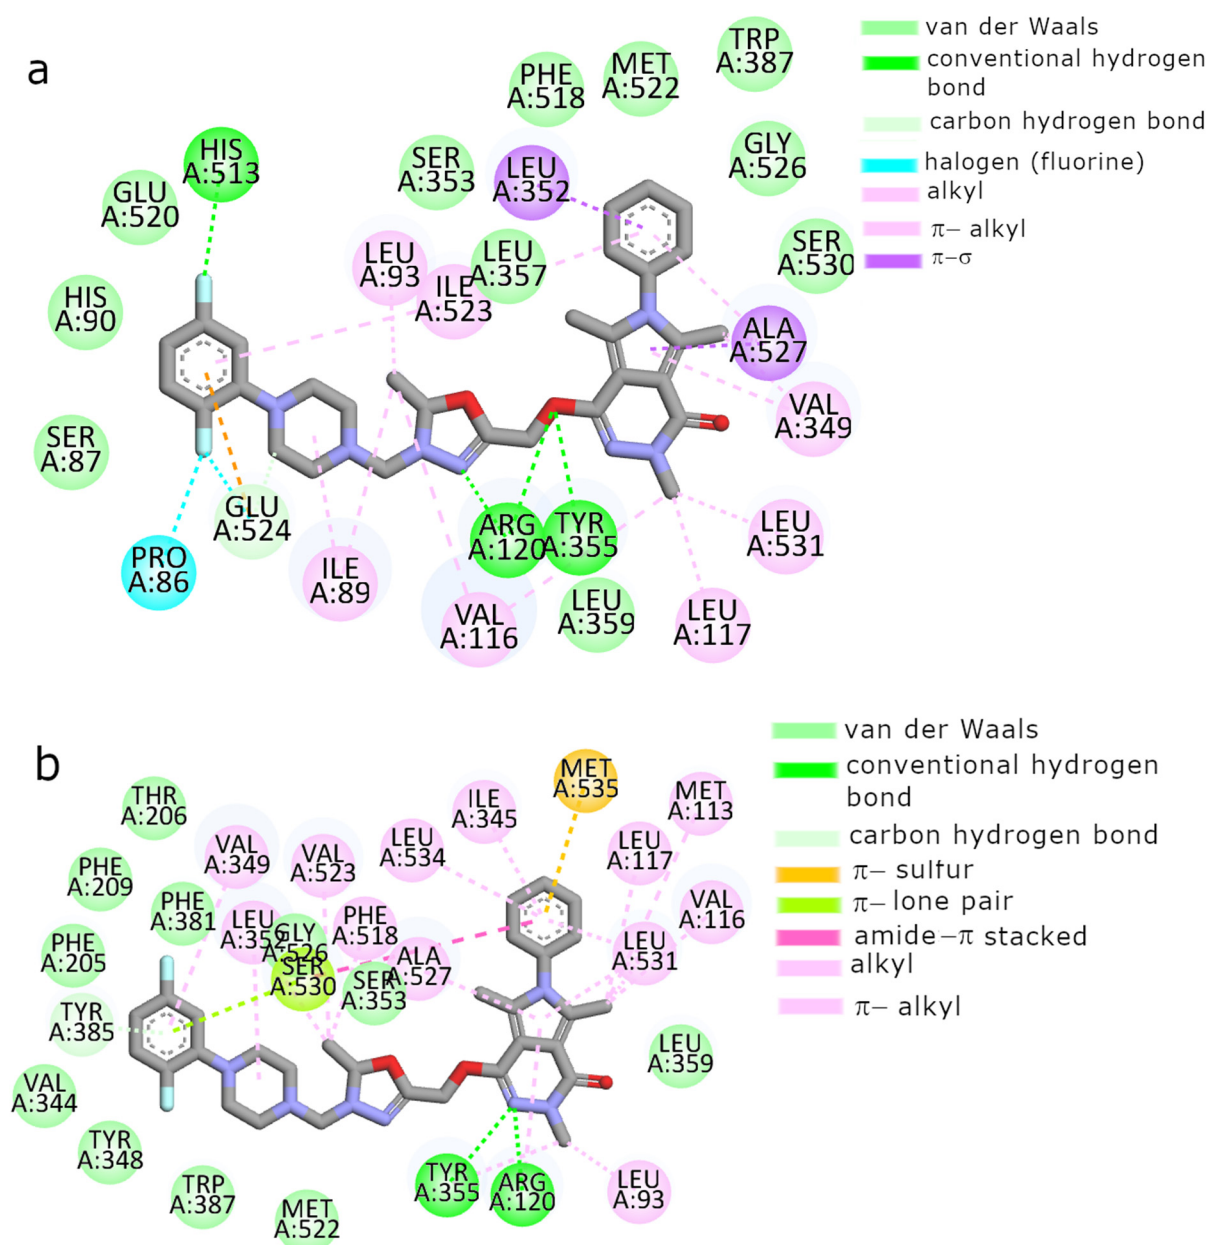

**Figure S4.** The intermolecular interactions of **3b** in the active centre of a) COX-1 b) COX-2

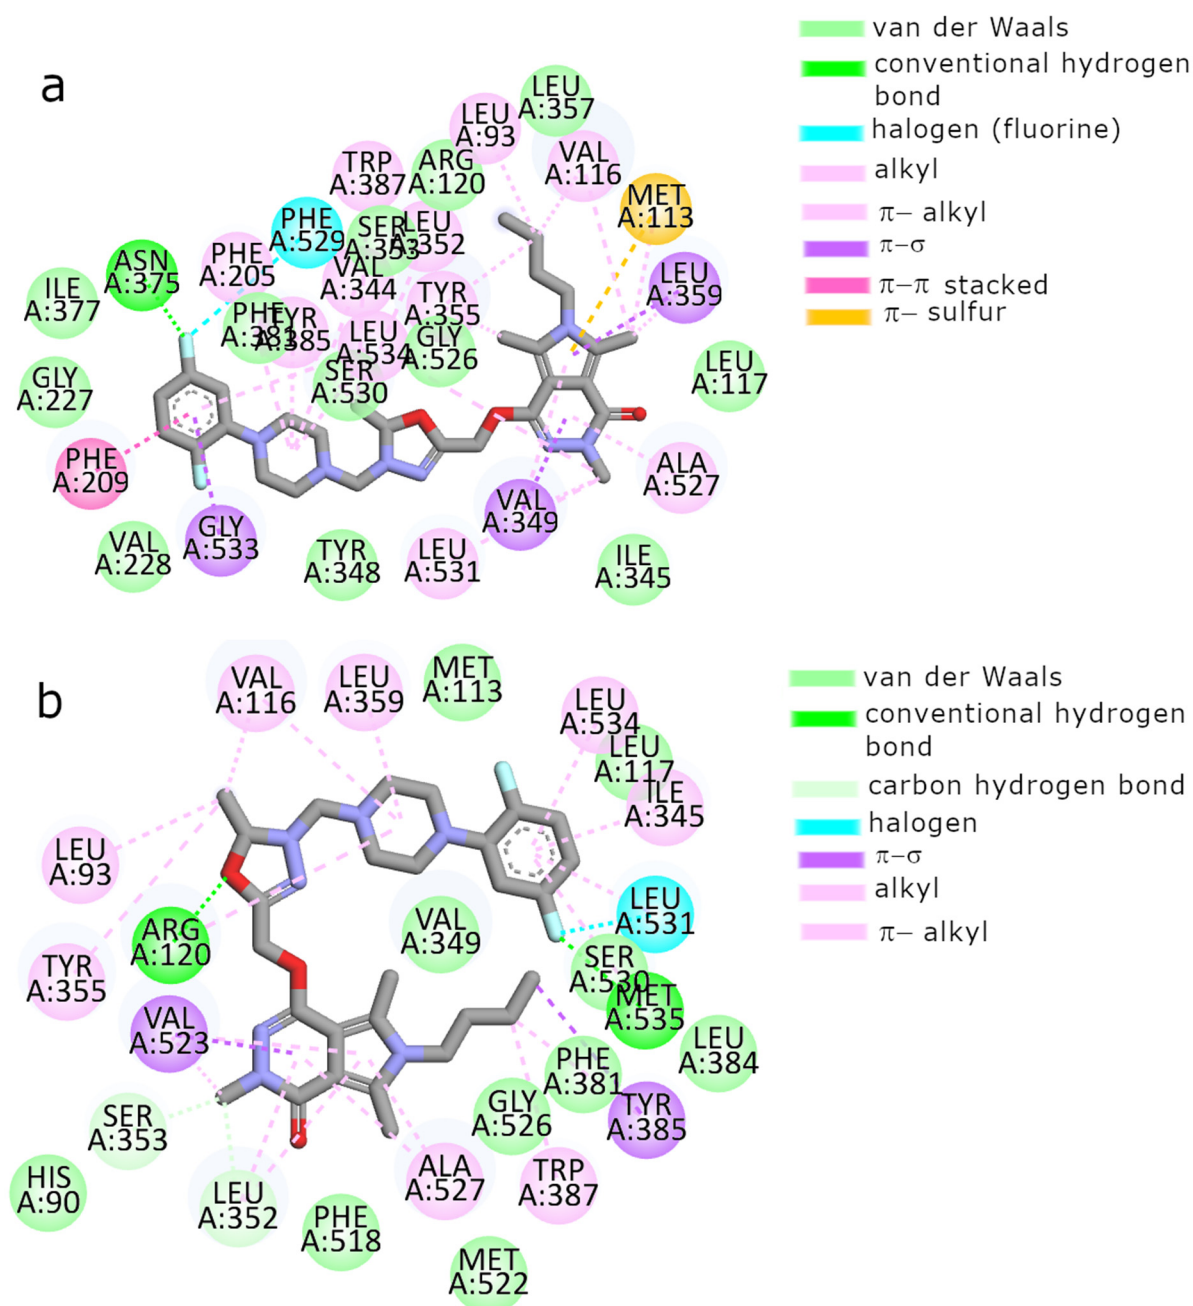



**Figure S5.** The intermolecular interactions of **4a** in the active centre of a) COX-1 b) COX-2

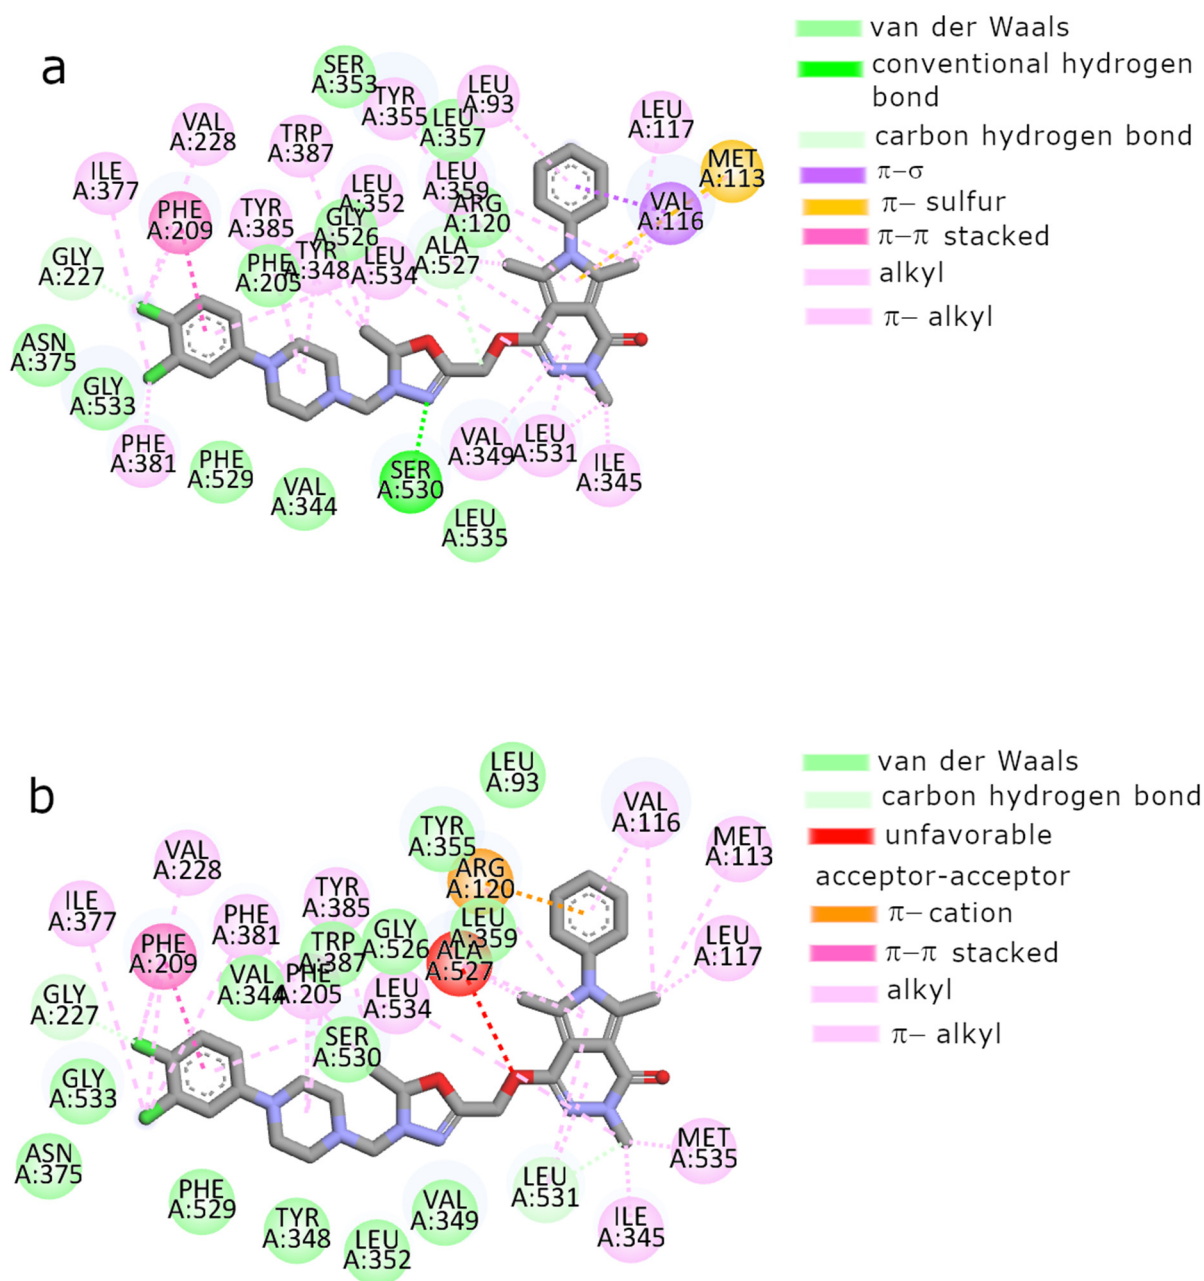

**Figure S6.** The intermolecular interactions of **4b** in the active centre of a) COX-1 b) COX-2

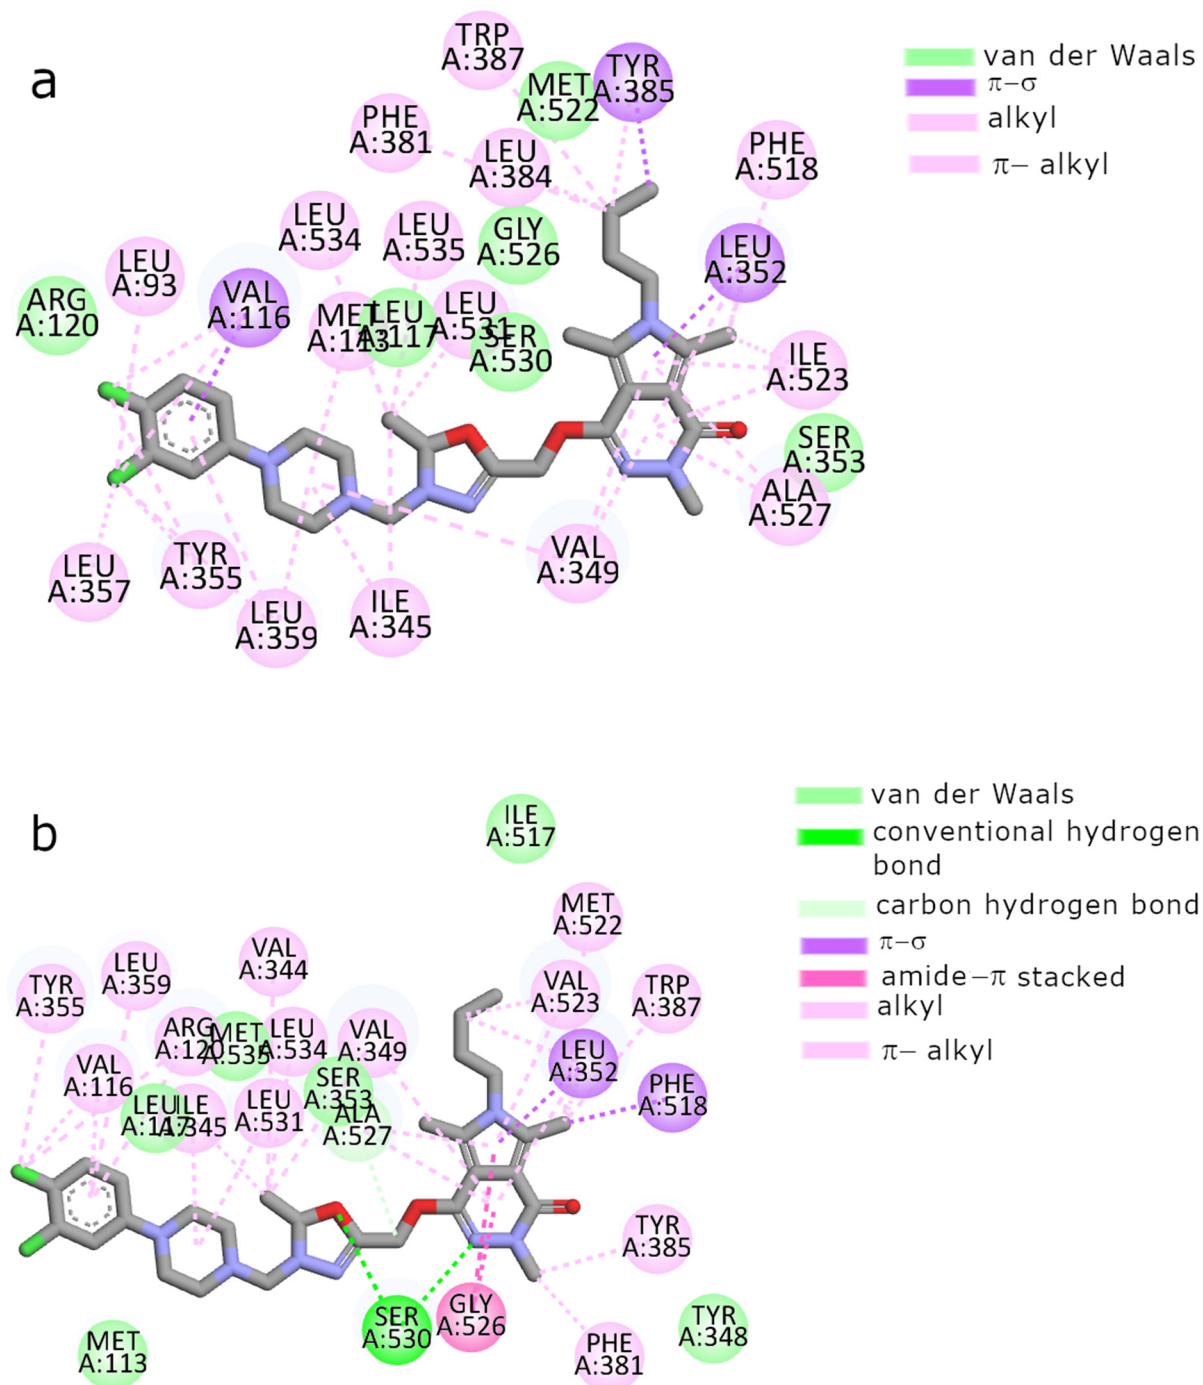

**Figure S7.** The intermolecular interactions of **5a** in the active centre of a) COX-1 b) COX-2

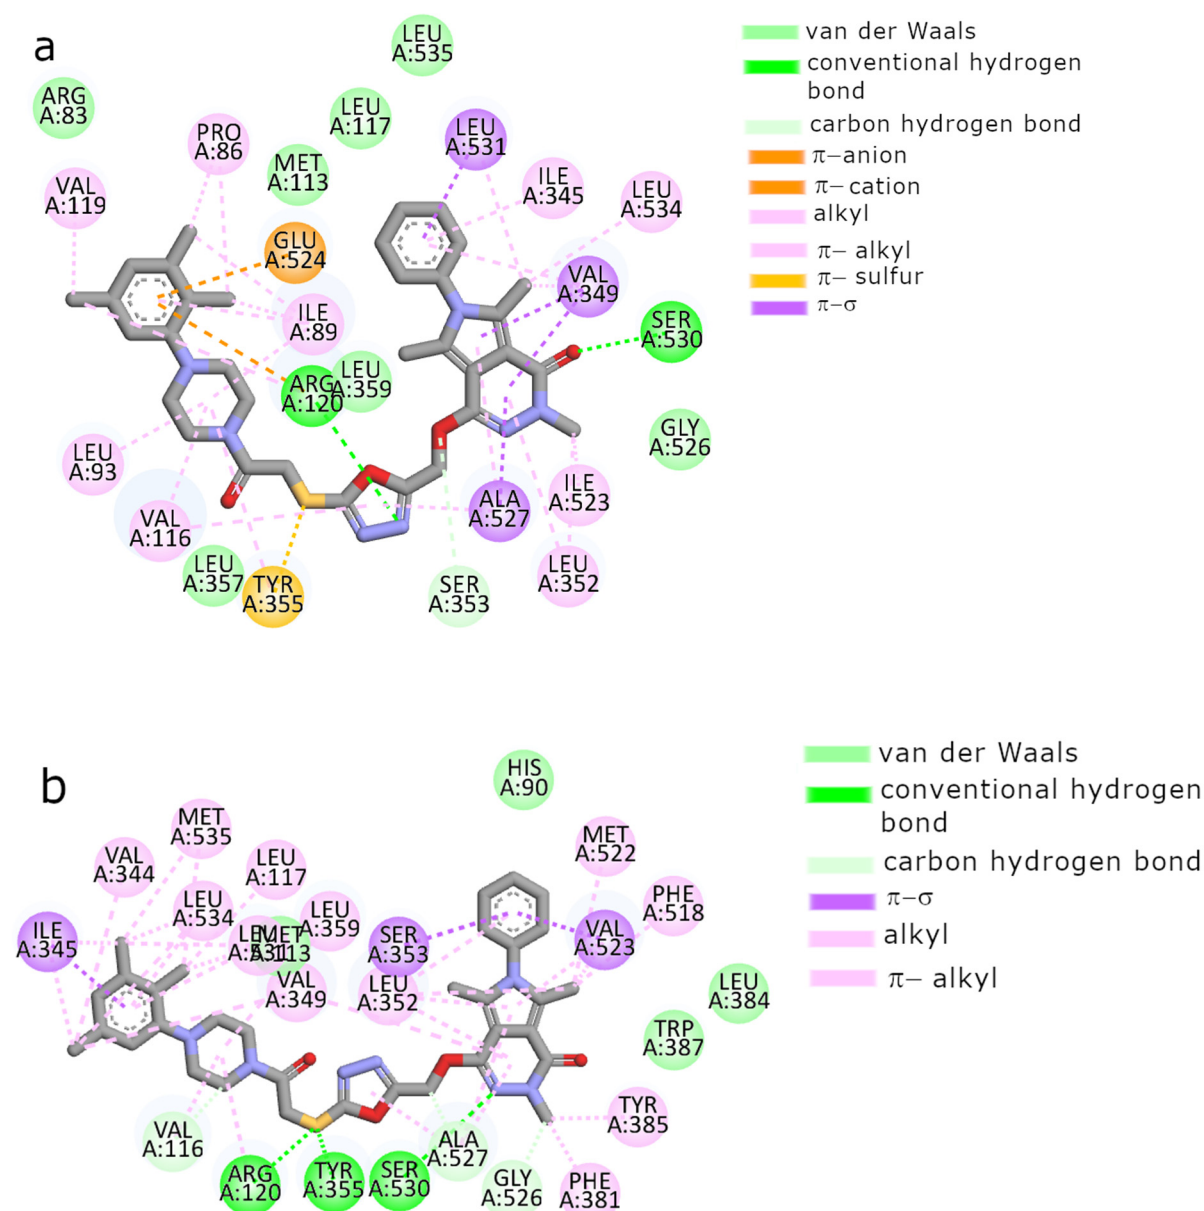

**Figure S8.** The intermolecular interactions of **5b** in the active centre of a) COX-1 b) COX-2

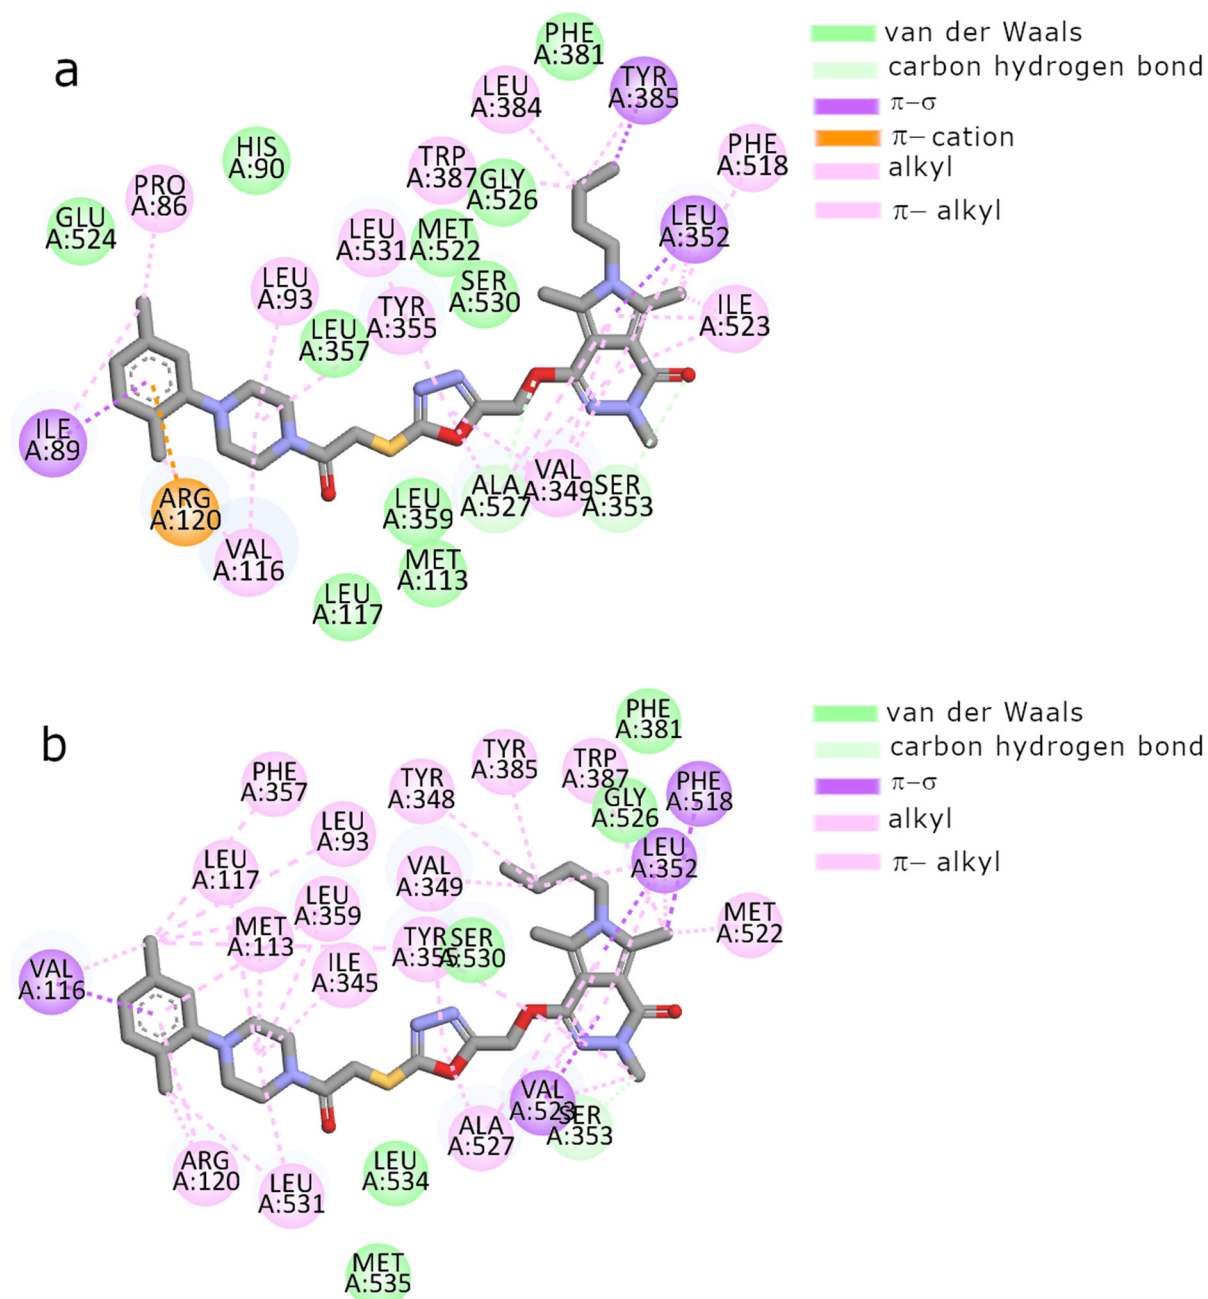



**Figure S9.** The intermolecular interactions of **6a** in the active centre of a) COX-1 b) COX-2

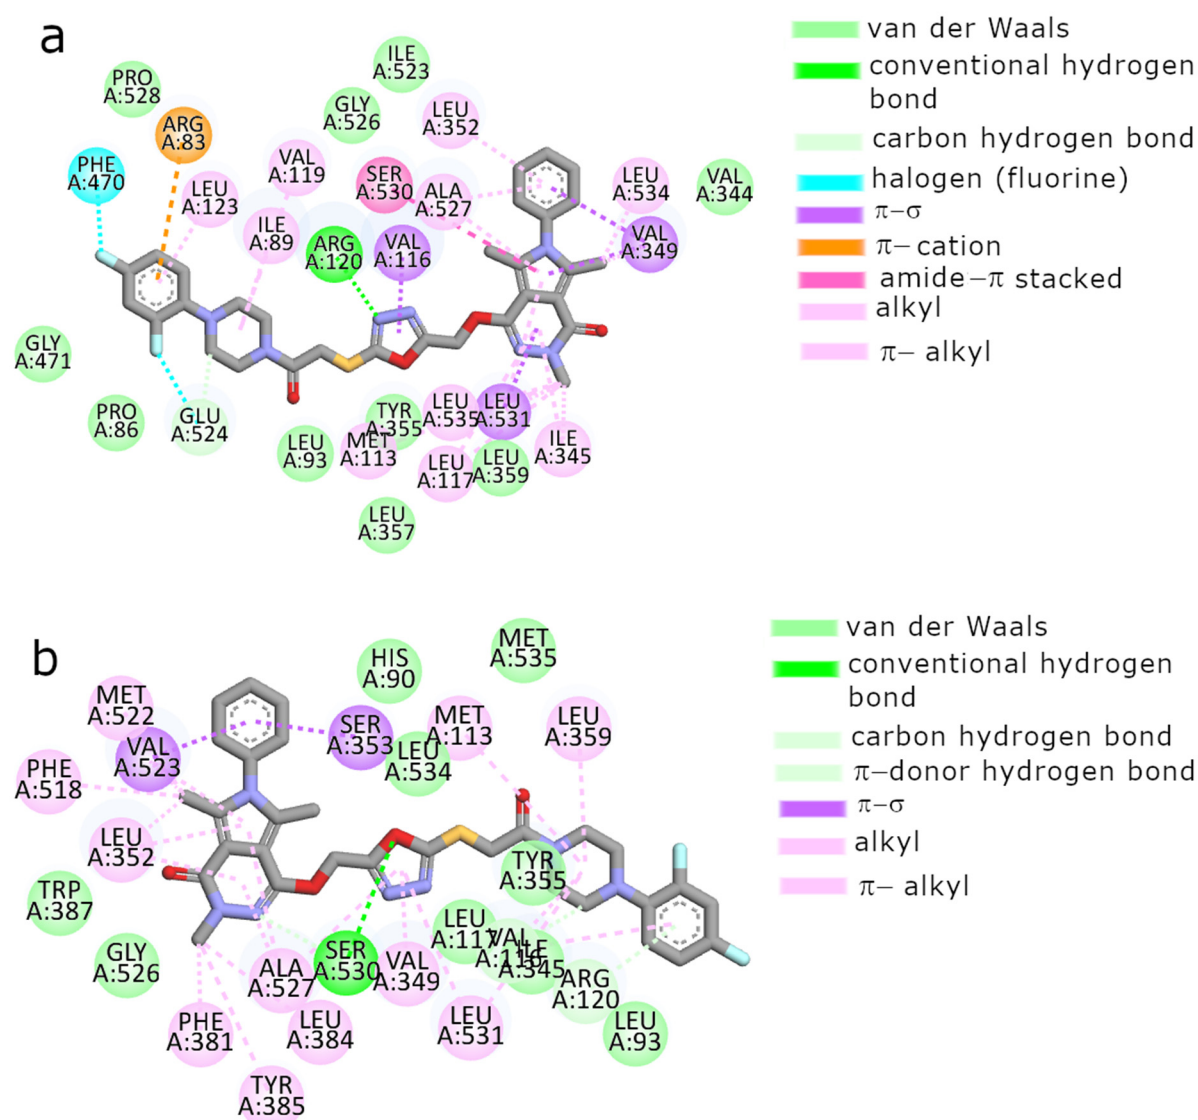

**Figure S10.** The intermolecular interactions of **6b** in the active centre of a) COX-1 b) COX-2

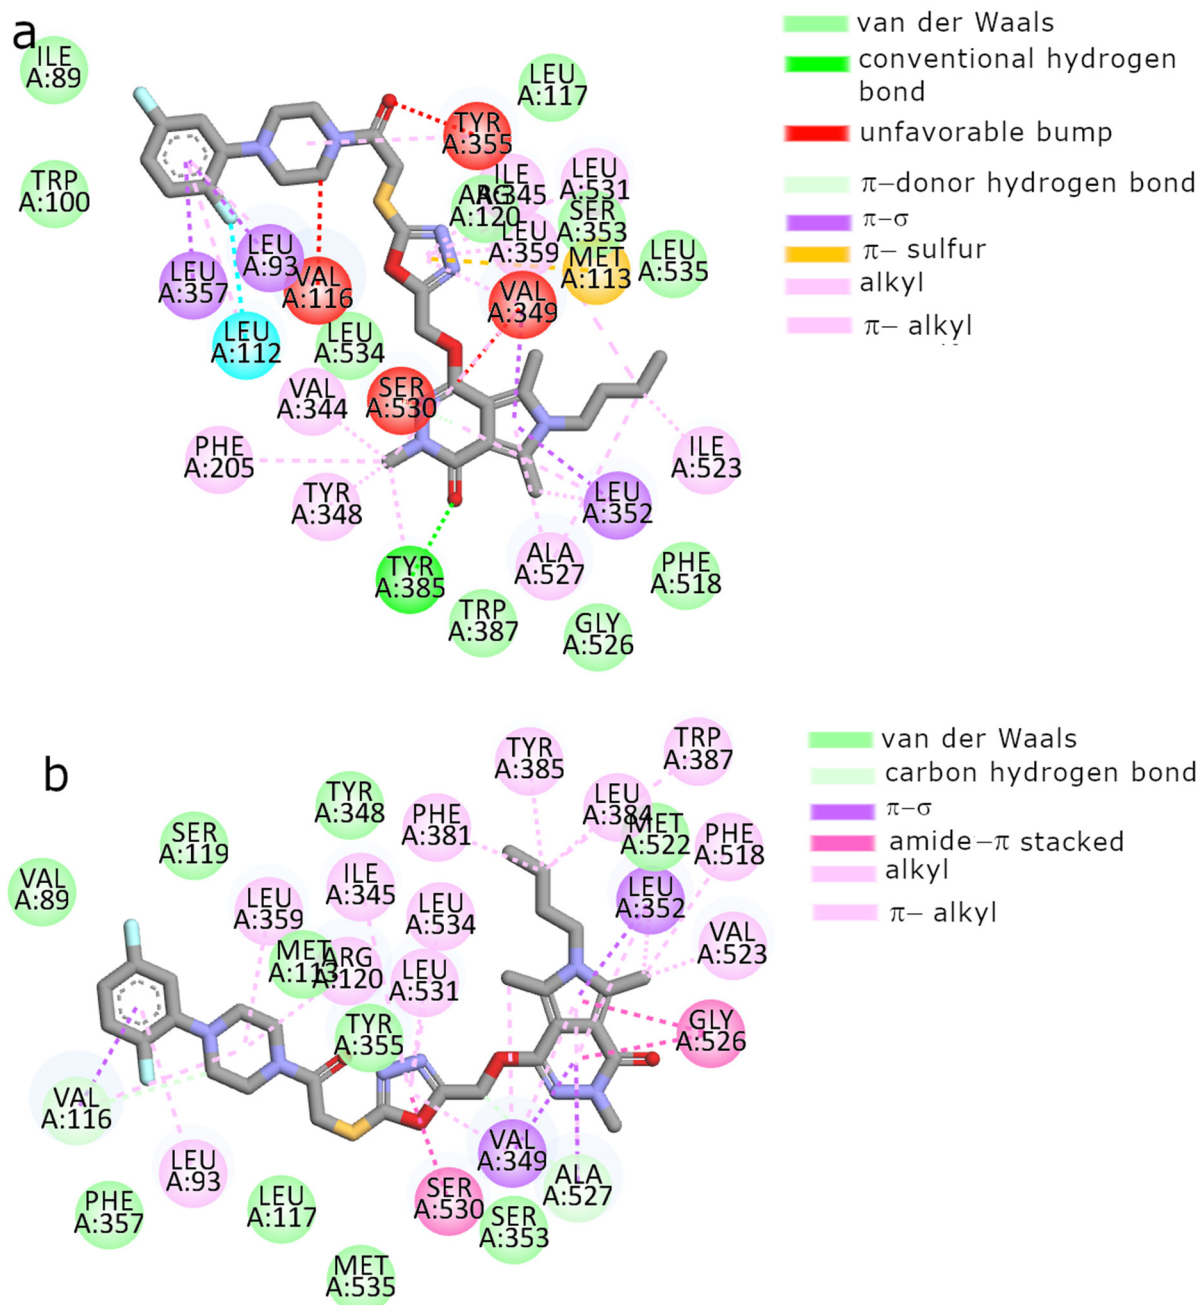

**Figure S11.** The intermolecular interactions of **7a** in the active centre of a) COX-1 b) COX-2

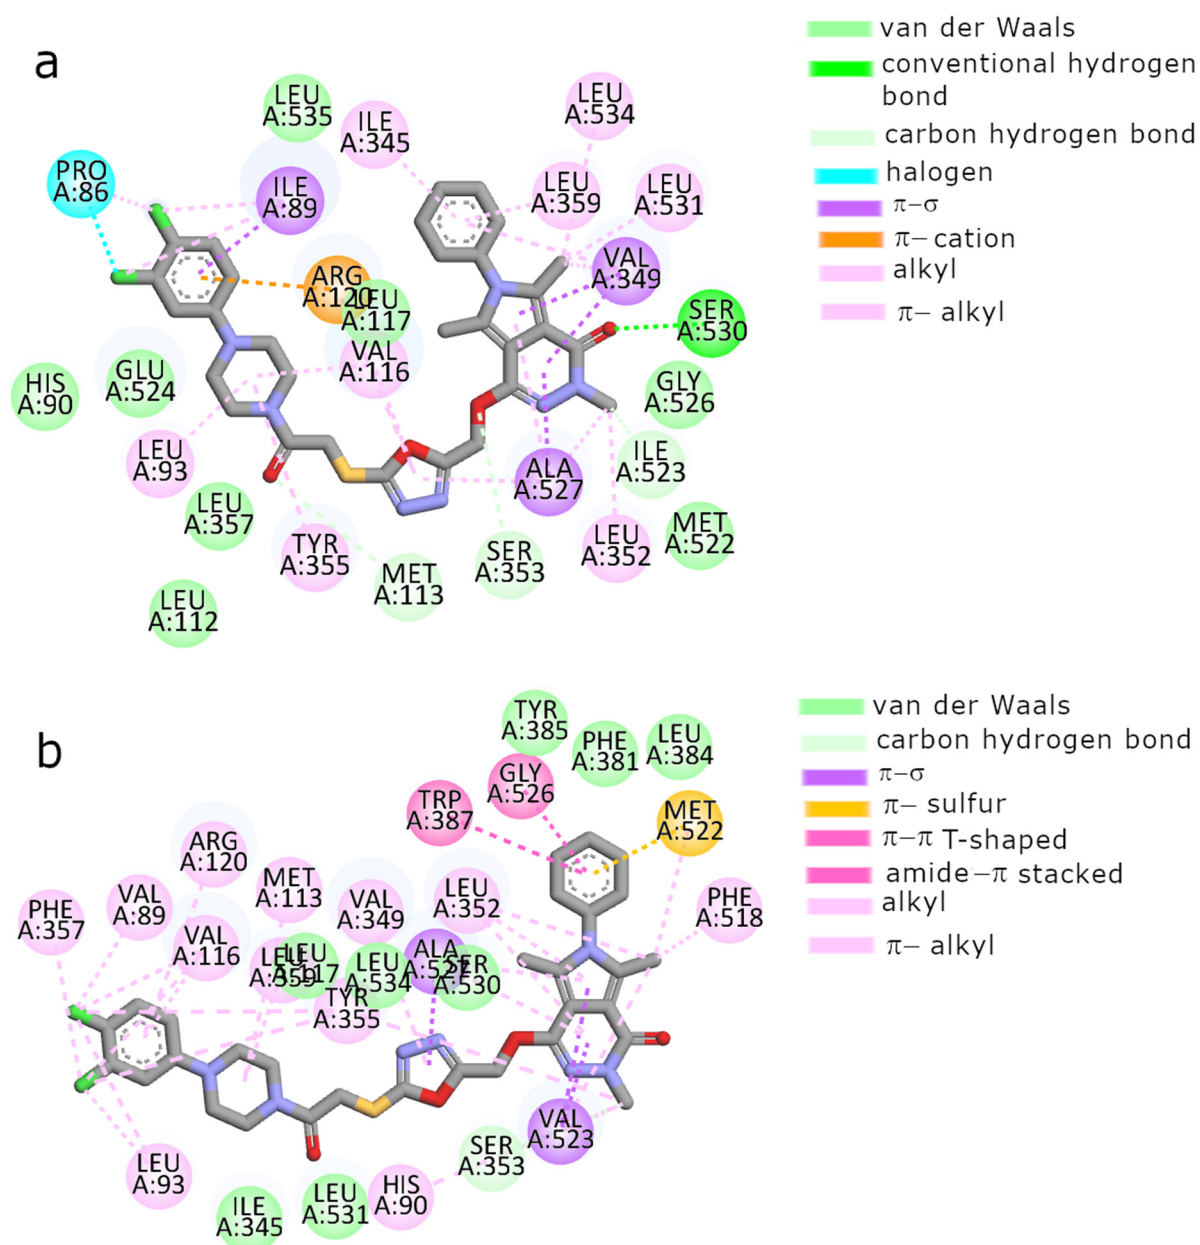

**Figure S12.** The intermolecular interactions of **7b** in the active centre of a) COX-1 b) COX-2

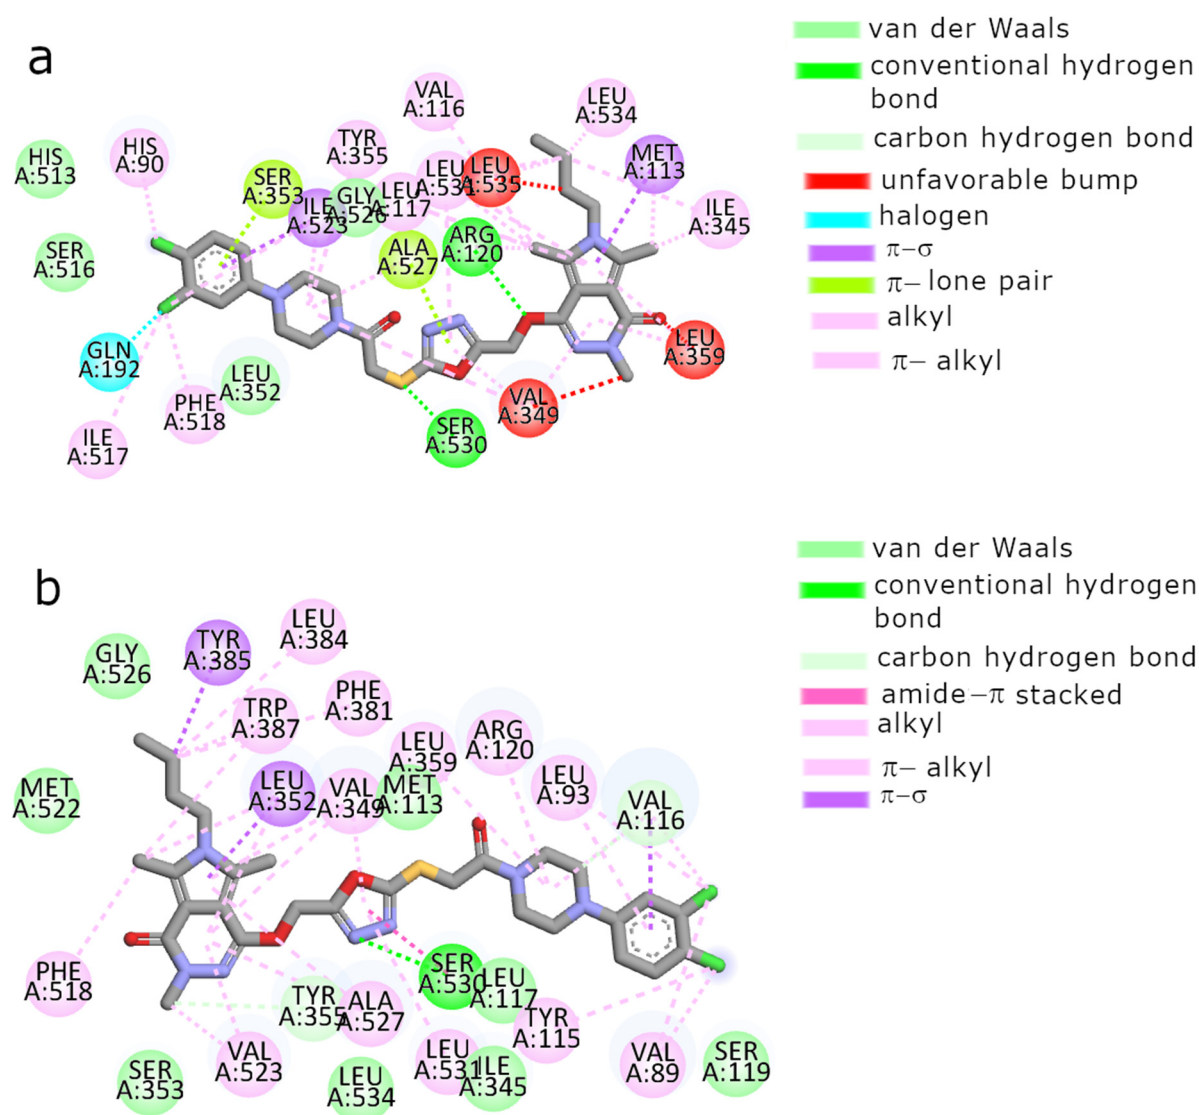

**Table S6.** Binding mode of investigated compounds with COX-1

Binding mode of compounds **a)** 2a, 2b, 3a, 3b, 4a, 4b; **b)** 5a, 5b, 6a, 6b, 7a, 7b; to the COX-1 obtained from molecular docking (by colour are marked amino acid residues responsible for meloxicam binding)

| <p><b>a</b></p> <p style="text-align: center;"><b>Compounds 2a 2b 3a 3b 4a 4b</b></p> 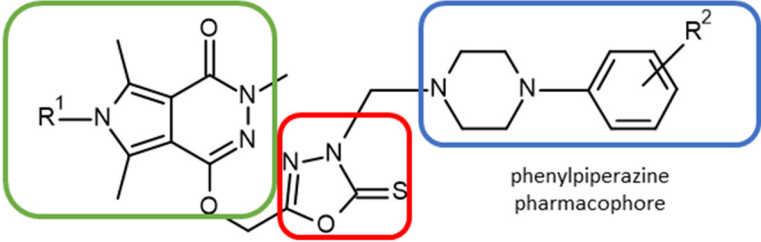 <p style="text-align: center;">pyrrolo[3,4-d]pyridazin-4-one scaffold      1,3,4-oxadiazole-2-thione moiety      phenylpiperazine pharmacophore</p> |                                                                                                                                                               |                                                                                                 |                                                                                  |
|------------------------------------------------------------------------------------------------------------------------------------------------------------------------------------------------------------------------------------------------------------------------------------------------------------------------------|---------------------------------------------------------------------------------------------------------------------------------------------------------------|-------------------------------------------------------------------------------------------------|----------------------------------------------------------------------------------|
| <p>2a</p> <p>R<sup>1</sup> (-C<sub>6</sub>H<sub>6</sub>) R<sup>2</sup> (-CH<sub>3</sub>, -CH<sub>3</sub>)</p>                                                                                                                                                                                                                | <p>Leu117 Ile345 Val349<br/>Leu352 Leu359 Met522<br/>Gly526 Ala527 Ser530<br/>Ile531 Leu534 Leu535</p>                                                        | <p>Leu93 Met113 Tyr355<br/>Leu357 Leu359</p>                                                    | <p>Arg83 Pro86 Ile89 Val116 Val119<br/>Arg120 Leu123 Glu524</p>                  |
| <p>2b</p> <p>R<sup>1</sup> (-C<sub>4</sub>H<sub>9</sub>) R<sup>2</sup> (-CH<sub>3</sub>, -CH<sub>3</sub>)</p>                                                                                                                                                                                                                | <p>Arg83 Pro86 Ser87 Ile89<br/>His90 Leu93 Val116<br/>Val119 Arg120 His513<br/>Glu520 Ile523 Glu524</p>                                                       | <p>Leu93 Arg120 Tyr355<br/>Leu359 Leu531</p>                                                    | <p>Tyr348 Val349 Leu352 Leu384 Tyr385<br/>Trp387 Met522 Gly526 Ala527 Ser530</p> |
| <p>3a</p> <p>R<sup>1</sup> (-C<sub>6</sub>H<sub>6</sub>) R<sup>2</sup> (-F, -F)</p>                                                                                                                                                                                                                                          | <p>Leu117 Val349 Leu352<br/>Leu357 Leu359 Trp387<br/>Phe518 Met522 Gly526<br/>Ala527 Ser530 Leu531</p>                                                        | <p>Ile89 Leu93 Val116<br/>Arg120 Tyr355 Leu359</p>                                              | <p>Pro86 Ser87 Ile89 His90 His513<br/>Glu520 Ile523 Glu524</p>                   |
| <p>3b</p> <p>R<sup>1</sup> (-C<sub>4</sub>H<sub>9</sub>) R<sup>2</sup> (-F, -F)</p>                                                                                                                                                                                                                                          | <p>Leu93 Met113 Val116<br/>Leu117 Arg120 Ile345<br/>Val349 Leu352 Leu359<br/>Tyr355 Gly526 Ala527</p>                                                         | <p>Val344 Tyr348 Leu352<br/>Trp387 Ser530 Leu531<br/>Ser353 Leu534</p>                          | <p>Phe205 Phe209 Gly227 Val228 Ile337<br/>Asn375 Phe381 Tyr385 Ser530 Gly533</p> |
| <p>4a</p> <p>R<sup>1</sup> (-C<sub>6</sub>H<sub>6</sub>) R<sup>2</sup> (-Cl, -Cl)</p>                                                                                                                                                                                                                                        | <p>Leu93 Met113 Val116<br/>Leu117 Arg120 Ile345<br/>Val349 Leu357 Leu359<br/>Ala527 Leu531 Leu534</p>                                                         | <p>Phe205 Val344 Tyr348<br/>Leu352 Ser353 Leu354<br/>Tyr355 Tyr385 Trp387<br/>Gly526 Ser530</p> | <p>Phe205 Phe209 Val228 Asn375<br/>Phe381 Tyr385 Gly533 Leu534</p>               |
| <p>4b</p> <p>R<sup>1</sup> (-C<sub>4</sub>H<sub>9</sub>) R<sup>2</sup> (-Cl, -Cl)</p>                                                                                                                                                                                                                                        | <p>Val349 Leu352 Ser353<br/>Phe381 Leu384 Tyr385<br/>Trp387 Phe518 Met522<br/>Ile523 Gly526 Ala527<br/>Ser530 Leu351</p>                                      | <p>Met113 Leu117 Val349<br/>Leu531 Leu534 Leu535</p>                                            | <p>Leu93 Met113 Val116 Arg120 Ile345<br/>Tyr355 Leu357 Leu359</p>                |
| <p>Meloxicam</p>                                                                                                                                                                                                                                                                                                             | <p>Met113 Val116 Leu117 Arg120 Ile345 Val349 Leu352 Ser353 Tyr355 Leu359 Tyr385 Trp387<br/>Phe518 Met522 Ile523 Gly526 Ala527 Ser530 Leu531 Leu534 Leu535</p> |                                                                                                 |                                                                                  |



b

Compounds 5a 5b 6a 6b 7a 7b

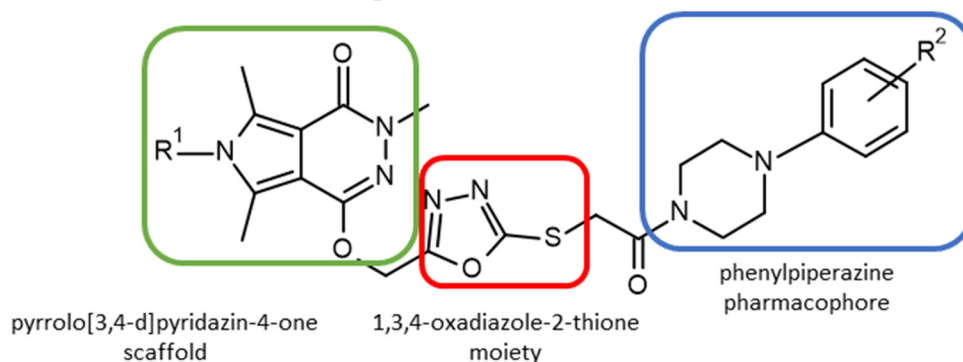

|                                                                                                              |                                                                                                                                                       |                                                                     |                                                                                |
|--------------------------------------------------------------------------------------------------------------|-------------------------------------------------------------------------------------------------------------------------------------------------------|---------------------------------------------------------------------|--------------------------------------------------------------------------------|
| 5a<br>R <sup>1</sup> (-C <sub>6</sub> H <sub>6</sub> ) R <sup>2</sup> (-CH <sub>3</sub> , -CH <sub>3</sub> ) | Met113 Leu117 Ile345<br>Val349 Leu352 Ile523<br>Gly526 Ala527 Ser530<br>Leu531 Leu534 Leu535                                                          | Arg120 Ser353 Leu359<br>Ala527                                      | Arg83 Pro86 Ile89 Leu93 Met113<br>Val116 Val119 Arg120 Tyr355 Leu357<br>Glu524 |
| 5b<br>R <sup>1</sup> (-C <sub>4</sub> H <sub>9</sub> ) R <sup>2</sup> (-CH <sub>3</sub> , -CH <sub>3</sub> ) | Val349 Leu352 Ser353<br>Leu384 Phe381 Tyr385<br>Trp387 Phe518 Met522<br>Ile523 Gly526 Ser530                                                          | Val349 Tyr355 Leu359<br>Ala527 Leu531                               | Pro86 Ile89 His90 Leu93 Val116<br>leu117 Arg120 Leu357 Glu524                  |
| 6a<br>R <sup>1</sup> (-C <sub>6</sub> H <sub>6</sub> ) R <sup>2</sup> (-F, -F)                               | Ile345 Val344 Val349<br>Leu352 Ile523 Ala527<br>Ser530 Leu531 Leu534                                                                                  | Leu93 Met113 Val116<br>Leu117 Arg120 Tyr355<br>Leu357 Gly526 Leu535 | Arg83 Ile89 Leu123 Gly471 Glu524<br>Pro528                                     |
| 6b<br>R <sup>1</sup> (-C <sub>4</sub> H <sub>9</sub> ) R <sup>2</sup> (-F, -F)                               | Met113 Phe205 Val344<br>Val349 Leu352 Ser353<br>Tyr385 Trp378 Phe518<br>Ile523 Ala527 Ser530<br>Leu531 Ser535                                         | Arg120 Ile345 Tyr355<br>Val349 Leu534 Leu359                        | Ile89 Leu93 Trp100 Leu112 Val116<br>Tyr355 Leu357                              |
| 7a<br>R <sup>1</sup> (-C <sub>6</sub> H <sub>6</sub> ) R <sup>2</sup> (-Cl, -Cl)                             | Ile345 Val349 Leu359<br>Met522 Ile523 Gly526<br>Ala527 Ser530 Leu531<br>Leu534                                                                        | Met113 Val116 Ser353<br>Tyr355 Ala527                               | Pro86 Ile89 His90 Leu112 Val116<br>Leu117 Arg120 Leu357 Glu524<br>Leu535       |
| 7b<br>R <sup>1</sup> (-C <sub>4</sub> H <sub>9</sub> ) R <sup>2</sup> (-Cl, -Cl)                             | Met113 Val116 Leu117<br>Arg120 Ile345 Val349<br>Leu359 Leu531 Leu534<br>Leu535                                                                        | Leu117 Arg120 Val349<br>Tyr355 Ala527 Ser530                        | His90 Gln192 Leu352 Ser353 His513<br>Ser516 Ile517 Phe518 Ile523               |
| Meloxicam                                                                                                    | Met113 Val116 Leu117 Arg120 Ile345 Val349 Leu352 Ser353 Tyr355 Leu359 Tyr385 Trp387<br>Phe518 Met522 Ile523 Gly526 Ala527 Ser530 Leu531 Leu534 Leu535 |                                                                     |                                                                                |

**Table S7.** Binding mode of investigated compounds with COX-2

Binding mode of compounds **a)** 2a, 2b, 3a, 3b, 4a, 4b; **b)** 5a, 5b, 6a, 6b, 7a, 7b; to the COX-2 obtained from molecular docking (by colour are marked amino acid residues responsible for meloxicam binding)

| <p><b>a</b></p> <p style="text-align: center;"><b>Compounds 2a 2b 3a 3b 4a 4b</b></p> 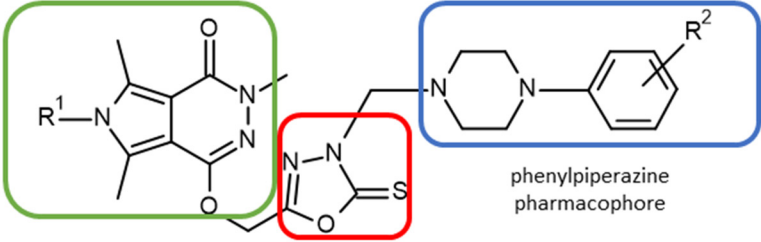 <p style="text-align: center;">pyrrolo[3,4-d]pyridazin-4-one scaffold      1,3,4-oxadiazole-2-thione moiety      phenylpiperazine pharmacophore</p> |                                                                                                                                                        |                                                      |                                                                                                                  |
|------------------------------------------------------------------------------------------------------------------------------------------------------------------------------------------------------------------------------------------------------------------------------------------------------------------------------|--------------------------------------------------------------------------------------------------------------------------------------------------------|------------------------------------------------------|------------------------------------------------------------------------------------------------------------------|
| <p>2a</p> <p>R<sup>1</sup> (-C<sub>6</sub>H<sub>6</sub>) R<sup>2</sup> (-CH<sub>3</sub>, -CH<sub>3</sub>)</p>                                                                                                                                                                                                                | <p>Val349 Leu352 Ser353<br/>Leu384 Trp387 Met522<br/>Val523 Ala527 Ser530<br/>Ser535</p>                                                               | <p>Ile345 Leu531 Leu534<br/>Met535</p>               | <p>Leu93 Met113 Val116 Leu117 Arg120<br/>Tyr355 Phe357 Leu359 Phe381<br/>Gly527</p>                              |
| <p>2b</p> <p>R<sup>1</sup> (-C<sub>4</sub>H<sub>9</sub>) R<sup>2</sup> (-CH<sub>3</sub>, -CH<sub>3</sub>)</p>                                                                                                                                                                                                                | <p>His90 Tyr348 Val349<br/>Leu352 Ser353 Phe381<br/>Tyr385 Trp387 Met522<br/>Val523 Gly526 Ala527<br/>Ser530 Leu531</p>                                | <p>Leu93 Val116 Arg120<br/>Tyr355</p>                | <p>Met113 Leu117 Ile345 Leu359 Ser530<br/>Leu531</p>                                                             |
| <p>3a</p> <p>R<sup>1</sup> (-C<sub>6</sub>H<sub>6</sub>) R<sup>2</sup> (-F, -F)</p>                                                                                                                                                                                                                                          | <p>Leu93 Met113 Val116<br/>Leu117 Arg120 Tyr355<br/>Ala527 Leu531 Leu534<br/>Met535 Leu359</p>                                                         | <p>Ser353 Phe518 Val523<br/>Gly526 Ser530</p>        | <p>Phe205 Thr206 Phe209 Val344 Tyr348<br/>Val349 Leu352 Phe381 Tyr385 Trp387<br/>Met522 Ser530</p>               |
| <p>3b</p> <p>R<sup>1</sup> (-C<sub>4</sub>H<sub>9</sub>) R<sup>2</sup> (-F, -F)</p>                                                                                                                                                                                                                                          | <p>His90 Val349 Ser352<br/>Ser353 Phe381 Leu384<br/>Tyr385 Trp387 Phe518<br/>Met522 Val523 Gly526<br/>Ala527 Met535</p>                                | <p>Leu93 Val116 Arg120<br/>Tyr355</p>                | <p>Met113 Val116 Leu117 Arg120 Ile349<br/>Leu359 Ser530 Leu531 Leu534</p>                                        |
| <p>4a</p> <p>R<sup>1</sup> (-C<sub>6</sub>H<sub>6</sub>) R<sup>2</sup> (-Cl, -Cl)</p>                                                                                                                                                                                                                                        | <p>Leu93 Met113 Val116<br/>Leu117 Arg120 Ile345<br/>Tyr355 Leu359 Ala527<br/>Leu531 Leu534 Met535</p>                                                  | <p>Val349 Leu352 Gly526<br/>Ser530 Leu531</p>        | <p>Phe205 Phe209 Gly227 Val228 Val344<br/>Tyr348 Asn375 Ile377 Phe381 Tyr385<br/>Trp387 Phe529 Ser530 Gly533</p> |
| <p>4b</p> <p>R<sup>1</sup> (-C<sub>4</sub>H<sub>9</sub>) R<sup>2</sup> (-Cl, -Cl)</p>                                                                                                                                                                                                                                        | <p>Tyr348 Val349 Leu352<br/>Tyr385 Trp387 Phe381<br/>Ile517 Phe518 Met522<br/>Val532 Gly526 Ala527<br/>Ser530 Ser353</p>                               | <p>Val344 Val349 Ser530<br/>Leu531 Ser353 Leu534</p> | <p>Met113 Leu117 Arg120 Ile345 Tyr355<br/>Leu359 Leu531 Met535</p>                                               |
| <p>Meloxicam</p>                                                                                                                                                                                                                                                                                                             | <p>Met113 Val116 Leu117 Arg120 Ile345 Val349 Leu352 Ser353 Tyr355 Leu359 Tyr385 Trp387<br/>Phe518 Met522 Val523 Ala527 Ser530 Leu531 Leu534 Met535</p> |                                                      |                                                                                                                  |

b

Compounds 5a 5b 6a 6b 7a 7b



|                                                                                                              |                                                                                                                                                       |                                                        |                                                                        |
|--------------------------------------------------------------------------------------------------------------|-------------------------------------------------------------------------------------------------------------------------------------------------------|--------------------------------------------------------|------------------------------------------------------------------------|
| 5a<br>R <sup>1</sup> (-C <sub>6</sub> H <sub>6</sub> ) R <sup>2</sup> (-CH <sub>3</sub> , -CH <sub>3</sub> ) | His90 Leu352 Ser353<br>Phe381 Leu384 Tyr385<br>Trp387 Phe518 Met522<br>Val523 Gly526 Ala527<br>Ser530                                                 | Arg120 Tyr355 Ala527<br>Ser530                         | Met113 Val116 Leu117 Arg120<br>Val344 Ile345 Leu534 Met535             |
| 5b<br>R <sup>1</sup> (-C <sub>4</sub> H <sub>9</sub> ) R <sup>2</sup> (-CH <sub>3</sub> , -CH <sub>3</sub> ) | Tyr348 Val349 Leu352<br>Phe381 Tyr385 Trp387<br>Val523 Phe518 Met522<br>Gly526 Ala527 Ser530<br>Ser535                                                | Tyr355 Ala527 Ser530                                   | Leu93 Met113 Val116 Leu117 Arg120<br>Ile345 Phe357 Leu359 Leu531       |
| 6a<br>R <sup>1</sup> (-C <sub>6</sub> H <sub>6</sub> ) R <sup>2</sup> (-F, -F)                               | Leu352 Ser353 Phe381<br>Tyr385 Trp387 Met522<br>Val523 Gly526 Phe518<br>Ala527                                                                        | His90 Val349 Ser530<br>Leu531 Leu534                   | Leu93 Met113 Val116 Leu117 Arg120<br>Ile345 Tyr355 Leu359 Met535       |
| 6b<br>R <sup>1</sup> (-C <sub>4</sub> H <sub>9</sub> ) R <sup>2</sup> (-F, -F)                               | Tyr348 Val349 Leu352<br>Phe381 Leu384 Tyr385<br>Trp387 Phe518 Met522<br>Val523 Gly526 Ala527<br>Leu534                                                | Arg120 Val349 Tyr355<br>Ser530 Leu531 Ser353           | Val89 Leu93 Met113 Val116 Leu117<br>Ser119 Arg120 Phe357 Leu359        |
| 7a<br>R <sup>1</sup> (-C <sub>6</sub> H <sub>6</sub> ) R <sup>2</sup> (-Cl, -Cl)                             | Phe381 Leu384 Tyr385<br>Trp387 Leu352 Phe518<br>Met522 Val523 Gly526<br>Ser530                                                                        | His90 Val349 Tyr355<br>Ala527 Ser530 Ser353<br>Leu534  | Val89 Leu93 Met113 Val116 Leu117<br>Arg120 Ile345 Phe357 Leu359 Leu531 |
| 7b<br>R <sup>1</sup> (-C <sub>4</sub> H <sub>9</sub> ) R <sup>2</sup> (-Cl, -Cl)                             | Val349 Leu352 Ser353<br>Tyr355 Phe381 Leu384<br>Tyr385 Trp387 Phe518<br>Met522 Val523 Gly526<br>Leu534                                                | Met113 Ile345 Leu349<br>Leu359 Ala527 Ser530<br>Leu531 | Val89 Leu93 Tyr115 Val116 Leu117<br>Ser119 Arg120 Ile345               |
| Meloxicam                                                                                                    | Met113 Val116 Leu117 Arg120 Ile345 Val349 Leu352 Ser353 Tyr355 Leu359 Tyr385 Trp387<br>Phe518 Met522 Val523 Gly526 Ala527 Ser530 Leu531 Leu534 Leu535 |                                                        |                                                                        |
